# Supplementary material
Source: publisher figshare collection journal article supplement (https://diabetesjournals.figshare.com/articles/dataset/_/23553117)
Supplement: Supplementary file 1 [file 1]

**Table S2: Genes measured using real time PCR**

| Symbol                            | Gene Name                                         | Forward Primer (5' to 3') |
|-----------------------------------|---------------------------------------------------|---------------------------|
|                                   |                                                   | Reverse Primer (5' to 3') |
| <b>Genes measured in sheep</b>    |                                                   |                           |
| <b>PCK1</b>                       | Phosphoenolpyruvate Carboxykinase 1               | TGTCCGAGGAGGATTTTGAG      |
|                                   |                                                   | ATGCCAATCTTGGACAGAGG      |
| <b>G6PC</b>                       | glucose 6-phosphatase                             | GGATTCTGGATCGTGCAACT      |
|                                   |                                                   | ATCCAATGGCGAAACTGAAC      |
| <b>PGC1A</b>                      | Peroxisome proliferator-activated receptor        | GTGACTCTGGGGTCAGAGGA      |
|                                   |                                                   | CACCAAACCCACAGAGAACC      |
| <b>LDHA</b>                       | lactate dehydrogenase-A                           | CATGGCCTGTGCCATCAGTA      |
|                                   |                                                   | GGAAAAGGCTGCCATGTTGG      |
| <b>CPT1A</b>                      | carnitine palmitoyltransferase 1A                 | GAAGCCTCTGCTGGATGACA      |
|                                   |                                                   | CGACCAGCTGCTCATGTAGT      |
| <b>S15</b>                        | Ribosomal Protein S15                             | ATCATTCTGCCCAGATGGTG      |
|                                   |                                                   | CGGGCCGGCCATGCTTTACG      |
| <b>OCT1</b>                       | organic cation uptake transporter 1 (SLC22A1)     | CATCCTCGTCACCATCGACC      |
|                                   |                                                   | TTCGGCCGACACAAGCTATT      |
| <b>OCT2</b>                       | organic cation uptake transporter 2 (SLC22A2)     | CATGGCCATCTCCCCAAACT      |
|                                   |                                                   | CTCCGGTATCTCAGCCCAAC      |
| <b>OCT3</b>                       | organic cation uptake transporter 3 (SLC22A3)     | CCCTTTGCAGCAAGCAATGT      |
|                                   |                                                   | GGGTAGCAACAGTGGTCCTC      |
| <b>MATE1</b>                      | Multidrug and toxin extrusion protein 1 (SLC47A1) | GTTACTGGTGTCTCGGTGGG      |
|                                   |                                                   | CGCCCACATGCTTCTTGTTT      |
| <b>MATE2</b>                      | Multidrug and toxin extrusion protein 2 (SLC47A2) | TTCCAGCTGTTTGATGCCCT      |
|                                   |                                                   | CATGACAGCATTACCCACGG      |
| <b>Genes measured in macaques</b> |                                                   |                           |
| <b>S15</b>                        | Ribosomal Protein S15                             | GACCAGAGCGGTCTTTTCTGA     |
|                                   |                                                   | CGGAAGGTCCGCTTCTTCTT      |
| <b>G6P</b>                        | glucose 6-phosphatase                             | GGCTGTGCAGCTGAACGTCTGT    |
|                                   |                                                   | TGCTGTGGATGTGGCTGAAAGTT   |
| <b>LDHA</b>                       | lactate dehydrogenase-A                           | CCAACATGGCAGCCTTTTCC      |
|                                   |                                                   | TCTCCCTCTTGTTGACGTGC      |
| <b>PEPCK</b>                      | Phosphoenolpyruvate Carboxykinase 1               | TCATGACGCGGATGGGCACG      |
|                                   |                                                   | CGTCAGCTCCGGGTTGCAGG      |
| <b>FGF21</b>                      | Fibroblast growth factor 21                       | AGATTCTGTGCCAGAAGCC       |
|                                   |                                                   | TTCTCAAGAAGCAGCTCCCG      |
| <b>GDF15</b>                      | Growth/differentiation factor 15                  | AAACACCGACCTCATCCAGG      |
|                                   |                                                   | GGAAATACGCAGGTGCAGGT      |
| <b>IGF2</b>                       | Insulin Like Growth Factor 2                      | GACACCCTCCAGTTCGTCTG      |
|                                   |                                                   | GGAAACAGCACTCCTCAACG      |
| <b>OCT1</b>                       | organic cation uptake transporter 1 (SLC22A1)     | TGAAAAGCTGAGCCCTTCGT      |

|                     |                                                   |                      |
|---------------------|---------------------------------------------------|----------------------|
|                     |                                                   | AGCCCCTGATAGAGCACAGA |
| <b><i>OCT2</i></b>  | organic cation uptake transporter 2 (SLC22A2)     | CTTACGCCCTTCCTCACTGG |
|                     |                                                   | TTCTGGGAGATCAGCCACCT |
| <b><i>OCT3</i></b>  | organic cation uptake transporter 3 (SLC22A3)     | TTAGGCTATGCAGCGGACAG |
|                     |                                                   | GCAGGAAGCGGAAGATCACA |
| <b><i>MATE1</i></b> | Multidrug and toxin extrusion protein 1 (SLC47A1) | GTGTCCAGGCTTACCCAGAC |
|                     |                                                   | TACGATCTGGGGCAGGAGAA |
| <b><i>MATE2</i></b> | Multidrug and toxin extrusion protein 2 (SLC47A2) | CTTTCACGTGTTTGAGGCCG |
|                     |                                                   | CCAGTGGTAGGCCGATGATG |
| <b><i>PGC1A</i></b> | Peroxisome proliferator-activated receptor        | GGACTCAAGTGGTGCAGTGA |
|                     |                                                   | CTGCTAGCAAGTTTGCCTCA |
