# Supplementary material
Source: publisher figshare collection journal article supplement (https://diabetesjournals.figshare.com/articles/dataset/_/23553117)
Supplement: Supplementary file 3 [file 1]

**Table S5: Top 50 KEGG metabolic pathway genes**

| Consensus Symbol | ENSEMBL GENE ID     | Control mean | Treatment mean | Fold change | P-value | Q-value |
|------------------|---------------------|--------------|----------------|-------------|---------|---------|
| TCIRG1           | ENSOARG000000014581 | 78.32        | 316.34         | 4.04        | 4.3E-05 | 0.02071 |
| AKR1D1           | ENSOARG000000010045 | 21.14        | 2.28           | -9.27       | 7.3E-05 | 0.0219  |
| SRR              | ENSOARG000000015317 | 12.45        | 4.67           | -2.67       | 9.8E-05 | 0.02256 |
| RRM2             | ENSOARG000000015333 | 26.21        | 5.78           | -4.53       | 0.00015 | 0.0236  |
| DGKD             | ENSOARG000000019293 | 18.55        | 36.52          | 1.97        | 0.00029 | 0.02413 |
| ALDH3B2          | ENSOARG000000014051 | 7.93         | 14.16          | 1.79        | 0.00038 | 0.02413 |
| DAD1             | ENSOARG000000019440 | 483.92       | 787.48         | 1.63        | 0.00026 | 0.02413 |
| PCCA             | ENSOARG000000004442 | 14.09        | 6.82           | -2.07       | 0.00019 | 0.02413 |
| SORD             | ENSOARG000000021059 | 19.12        | 8.91           | -2.15       | 0.00036 | 0.02413 |
| DPYS             | ENSOARG000000015650 | 41.11        | 12.08          | -3.4        | 0.00031 | 0.02413 |
| ACSM3            | ENSOARG000000013163 | 128.92       | 31.09          | -4.15       | 0.00022 | 0.02413 |
| ALG1             | ENSOARG000000005002 | 23.19        | 15.16          | -1.53       | 0.00043 | 0.02442 |
| ACSL4            | ENSOARG000000017954 | 263.86       | 110.87         | -2.38       | 0.00046 | 0.02453 |
| ALDH1A1          | ENSOARG000000012705 | 49.15        | 18.8           | -2.61       | 0.00048 | 0.02476 |
| FBP1             | ENSOARG000000008650 | 145.75       | 36.46          | -4          | 0.00049 | 0.02476 |
| UCKL1            | ENSOARG000000009543 | 7.47         | 15.72          | 2.1         | 0.00059 | 0.02539 |
| TPH1             | ENSOARG000000001345 | 34.84        | 7.48           | -4.66       | 0.00058 | 0.02539 |
| AOC1             | ENSOARG000000001799 | 80.04        | 8.17           | -9.8        | 0.00059 | 0.02539 |
| GCH1             | ENSOARG000000021078 | 23.89        | 80.21          | 3.36        | 0.00064 | 0.02545 |
| TGDS             | ENSOARG000000000718 | 14.73        | 28.37          | 1.93        | 0.00069 | 0.02545 |
| PCCB             | ENSOARG000000007925 | 29.2         | 16.07          | -1.82       | 0.00085 | 0.02606 |
| ALDH18A1         | ENSOARG000000006313 | 21.64        | 11.81          | -1.83       | 0.00087 | 0.02606 |
| AK1              | ENSOARG000000011321 | 9.99         | 4.22           | -2.37       | 0.00087 | 0.02606 |
| TK1              | ENSOARG000000005673 | 20.97        | 8.2            | -2.56       | 0.00087 | 0.02606 |
| EHHADH           | ENSOARG000000020569 | 57           | 20.85          | -2.73       | 0.00079 | 0.02606 |
| CYP3A4           | ENSOARG000000018283 | 19.91        | 129.87         | 6.52        | 0.00108 | 0.02618 |
| PFKFB3           | ENSOARG000000013082 | 23.25        | 82.66          | 3.56        | 0.00119 | 0.02618 |
| PI4K2A           | ENSOARG000000011093 | 23.1         | 76.03          | 3.29        | 0.00113 | 0.02618 |
| IDUA             | ENSOARG000000016268 | 54.89        | 34.35          | -1.6        | 0.00096 | 0.02618 |
| DNMT1            | ENSOARG000000015380 | 26.48        | 15.27          | -1.73       | 0.00104 | 0.02618 |
| ACER2            | ENSOARG000000014252 | 19.6         | 10.44          | -1.88       | 0.00102 | 0.02618 |
| FMO5             | ENSOARG000000020524 | 10.48        | 5.46           | -1.92       | 0.0011  | 0.02618 |
| GATM             | ENSOARG000000021045 | 380.79       | 193.8          | -1.96       | 0.00106 | 0.02618 |
| ACAA2            | ENSOARG000000004046 | 63.89        | 32.02          | -2          | 0.001   | 0.02618 |
| ACADVL           | ENSOARG000000010662 | 101.92       | 47.23          | -2.16       | 0.00098 | 0.02618 |
| AGMAT            | ENSOARG000000009382 | 29.76        | 12.61          | -2.36       | 0.0012  | 0.02618 |
| ST6GALNAC6       | ENSOARG000000011307 | 75.84        | 25.34          | -2.99       | 0.00098 | 0.02618 |
| AGXT             | ENSOARG000000018314 | 47.09        | 14.51          | -3.25       | 0.00124 | 0.02618 |
| GSTA1            | ENSOARG000000017584 | 73.06        | 20.77          | -3.52       | 0.00103 | 0.02618 |

|          |                    |         |        |       |         |         |
|----------|--------------------|---------|--------|-------|---------|---------|
| HGD      | ENSOARG00000019925 | 20.8    | 5.15   | -4.04 | 0.00113 | 0.02618 |
| GALM     | ENSOARG00000008843 | 97.12   | 20.99  | -4.63 | 0.00122 | 0.02618 |
| URAD     | ENSOARG00000012428 | 24.54   | 2.76   | -8.89 | 0.00122 | 0.02618 |
| ATP6V1C1 | ENSOARG00000016832 | 39.8    | 119.53 | 3     | 0.00218 | 0.02673 |
| CYP26B1  | ENSOARG00000011582 | 3.87    | 11.12  | 2.87  | 0.00191 | 0.02673 |
| AHCYL2   | ENSOARG00000004375 | 6.71    | 15.75  | 2.35  | 0.00228 | 0.02673 |
| GUCY1B1  | ENSOARG00000007989 | 28.98   | 60.1   | 2.07  | 0.00134 | 0.02673 |
| SAT1     | ENSOARG00000016798 | 1563.15 | 3088.4 | 1.98  | 0.00205 | 0.02673 |
| HMGCR    | ENSOARG00000016724 | 35.5    | 69.3   | 1.95  | 0.00205 | 0.02673 |
| ALDH3B1  | ENSOARG00000014292 | 11.95   | 22.29  | 1.87  | 0.00171 | 0.02673 |
| CHPT1    | ENSOARG00000015196 | 71.38   | 45.85  | -1.56 | 0.0022  | 0.02673 |
