# Supplementary material
Source: publisher figshare collection journal article supplement (https://diabetesjournals.figshare.com/articles/dataset/_/23553117)
Supplement: Supplementary file 4 [file 1]

**Table S1: Antibodies used for western immunoblotting**

| <b>ANTIBODY NAME</b> | <b>MW</b> | <b>HOST</b> | <b>COMPANY</b> | <b>CATALOG #</b> |
|----------------------|-----------|-------------|----------------|------------------|
| ph-AMPK (Thr172)     | 62        | rabbit      | Cell Signaling | 2531             |
| AMPK alpha           | 62        | Mouse       | Cell Signaling | 2793             |
| ph-CREB (Ser133)     | 43        | Rabbit      | Cell Signaling | 9198             |
| CREB (48H2)          | 43        | Rabbit      | Cell Signaling | 9197             |
| ph-EIF2a (S51)       | 38        | Rabbit      | Cell Signaling | 9721             |
| EIF2a (L57A5)        | 38        | rabbit      | Cell Signaling | 2103             |
| ph-S6 (S235/6)       | 32        | rabbit      | Cell Signaling | 2211             |
| S6                   | 32        | rabbit      | Cell Signaling | 2317             |
| ph-mTOR (Y2448)      | 289       | rabbit      | Cell Signaling | 2971             |
| mTOR                 | 289       | rabbit      | Cell Signaling | 4517             |
| NRF-2                | 95        | rabbit      | Invitrogen     | PA5-27882        |
