# Supplementary material
Source: publisher figshare collection journal article supplement (https://diabetesjournals.figshare.com/articles/dataset/_/23553117)
Supplement: Supplementary file 5 [file 1]

**Table S4. List of differentially expressed genes with metformin in fetal sheep hepatocytes.**

| ENSEMBL GENE ID     | Symbol       | Basal Mean | Metformin Mean | Linear fold-change | P-value  | Q-value  |
|---------------------|--------------|------------|----------------|--------------------|----------|----------|
| ENSOARG000000018142 | LMNB1        | 23.13      | 9.44           | -2.45              | 4.32E-06 | 0.012881 |
| ENSOARG000000008185 | PRIM1        | 11.43      | 4.28           | -2.67              | 6.25E-06 | 0.012881 |
| ENSOARG000000007840 | BHLHE40      | 81.18      | 124.76         | 1.54               | 2.68E-05 | 0.020709 |
| ENSOARG000000012666 | JARID2       | 9.15       | 14.6           | 1.6                | 3.54E-05 | 0.020709 |
| ENSOARG000000008388 | KDM4B        | 21.75      | 37.58          | 1.73               | 1.96E-05 | 0.020709 |
| ENSOARG000000017235 | KLHL4        | 12.33      | 6.63           | -1.86              | 1.86E-05 | 0.020709 |
| ENSOARG000000015337 | LOC101109035 | 48.96      | 19.6           | -2.5               | 3.41E-05 | 0.020709 |
| ENSOARG000000002475 | PEG10        | 2611.81    | 511.18         | -5.11              | 2.63E-05 | 0.020709 |
| ENSOARG000000018913 | RNF128       | 253.48     | 120.26         | -2.11              | 4.35E-05 | 0.020709 |
| ENSOARG000000006548 | SLC22A7      | 43.95      | 4.77           | -9.21              | 3.98E-05 | 0.020709 |
| ENSOARG000000014581 | TCIRG1       | 78.32      | 316.34         | 4.04               | 4.29E-05 | 0.020709 |
| ENSOARG000000018440 | LRRN4        | 11.67      | 1.9            | -6.14              | 5.21E-05 | 0.021592 |
| ENSOARG000000017753 | -            | 21.93      | 8.46           | -2.59              | 8.23E-05 | 0.021898 |
| ENSOARG000000010045 | AKR1D1       | 21.14      | 2.28           | -9.27              | 7.30E-05 | 0.021898 |
| ENSOARG000000004271 | CLSTN3       | 107.75     | 57.05          | -1.89              | 7.73E-05 | 0.021898 |
| ENSOARG000000016710 | GJB1         | 204.58     | 42.72          | -4.79              | 6.23E-05 | 0.021898 |
| ENSOARG000000000483 | NFKB2        | 48.46      | 78.29          | 1.62               | 7.76E-05 | 0.021898 |
| ENSOARG000000009154 | STAT2        | 67.17      | 35.45          | -1.89              | 8.50E-05 | 0.021898 |
| ENSOARG000000010970 | KLHL36       | 15.37      | 45.14          | 2.94               | 9.67E-05 | 0.022555 |
| ENSOARG000000014888 | LECT2        | 313.76     | 85.5           | -3.67              | 9.22E-05 | 0.022555 |
| ENSOARG000000015317 | SRR          | 12.45      | 4.67           | -2.67              | 9.85E-05 | 0.022555 |
| ENSOARG000000008385 | CTSV         | 540.68     | 859.67         | 1.59               | 0.000112 | 0.022657 |
| ENSOARG000000007444 | MRAS         | 16.92      | 35.37          | 2.09               | 0.000121 | 0.022657 |
| ENSOARG000000011727 | RAI14        | 80.22      | 173.66         | 2.16               | 0.00012  | 0.022657 |
| ENSOARG000000005240 | SPAG7        | 93.99      | 155.74         | 1.66               | 0.000118 | 0.022657 |
| ENSOARG000000000306 | TIFA         | 8.53       | 1.11           | -7.68              | 0.000114 | 0.022657 |
| ENSOARG000000010343 | CHD2         | 22.16      | 36.08          | 1.63               | 0.000136 | 0.022712 |
| ENSOARG000000015194 | CRYAB        | 952.41     | 6383.24        | 6.7                | 0.000133 | 0.022712 |
| ENSOARG000000014561 | MICALL1      | 44.11      | 87.76          | 1.99               | 0.000129 | 0.022712 |
| ENSOARG000000012255 | TET3         | 5.7        | 24.81          | 4.35               | 0.00013  | 0.022712 |
| ENSOARG000000025757 | -            | 16.91      | 31.46          | 1.86               | 0.000148 | 0.023601 |
| ENSOARG000000015333 | RRM2         | 26.21      | 5.78           | -4.53              | 0.000152 | 0.023601 |
| ENSOARG000000013921 | UBE2B        | 19.35      | 32             | 1.65               | 0.000153 | 0.023601 |
| ENSOARG000000007700 | RBM4         | 77.47      | 45.16          | -1.72              | 0.000161 | 0.0237   |
| ENSOARG000000008067 | SNX18        | 81.28      | 122.52         | 1.51               | 0.000161 | 0.0237   |
| ENSOARG000000020698 | ARHGDIB      | 12.6       | 7.45           | -1.69              | 0.000167 | 0.024067 |
| ENSOARG000000004315 | ACSF2        | 37.03      | 19.33          | -1.92              | 0.000288 | 0.024133 |

|                    |          |         |         |       |          |          |
|--------------------|----------|---------|---------|-------|----------|----------|
| ENSOARG00000013163 | ACSM3    | 128.92  | 31.09   | -4.15 | 0.000222 | 0.024133 |
| ENSOARG00000014051 | ALDH3B2  | 7.93    | 14.16   | 1.79  | 0.000383 | 0.024133 |
| ENSOARG00000017722 | AP4M1    | 10.34   | 15.53   | 1.5   | 0.000176 | 0.024133 |
| ENSOARG00000010000 | ASGR2    | 194.39  | 99.52   | -1.95 | 0.000296 | 0.024133 |
| ENSOARG00000013636 | CDKN1A   | 78.51   | 303.86  | 3.87  | 0.000176 | 0.024133 |
| ENSOARG00000002309 | CFAP36   | 27.09   | 57.41   | 2.12  | 0.000275 | 0.024133 |
| ENSOARG00000002536 | CIAO2B   | 78.59   | 140.17  | 1.78  | 0.000333 | 0.024133 |
| ENSOARG00000018936 | CYP2D6   | 78.09   | 46.13   | -1.69 | 0.000284 | 0.024133 |
| ENSOARG00000019440 | DAD1     | 483.92  | 787.48  | 1.63  | 0.000255 | 0.024133 |
| ENSOARG00000014319 | DDAH1    | 14.29   | 7.5     | -1.91 | 0.000359 | 0.024133 |
| ENSOARG00000019293 | DGKD     | 18.55   | 36.52   | 1.97  | 0.000292 | 0.024133 |
| ENSOARG00000011917 | DIDO1    | 12.08   | 6.13    | -1.97 | 0.000182 | 0.024133 |
| ENSOARG00000015650 | DPYS     | 41.11   | 12.08   | -3.4  | 0.000307 | 0.024133 |
| ENSOARG00000010809 | DVL2     | 11.29   | 17      | 1.51  | 0.000318 | 0.024133 |
| ENSOARG00000008586 | EBPL     | 40.13   | 22.74   | -1.76 | 0.000235 | 0.024133 |
| ENSOARG00000015633 | FEN1     | 20.54   | 8.95    | -2.29 | 0.000259 | 0.024133 |
| ENSOARG00000018716 | FGF16    | 1.8     | 15.33   | 8.52  | 0.000251 | 0.024133 |
| ENSOARG00000012522 | FOXRED1  | 53.86   | 24.15   | -2.23 | 0.000256 | 0.024133 |
| ENSOARG00000003596 | HEATR6   | 21.79   | 33.34   | 1.53  | 0.000365 | 0.024133 |
| ENSOARG00000011542 | KLB      | 38.95   | 6.24    | -6.24 | 0.000249 | 0.024133 |
| ENSOARG00000003256 | LCAT     | 163.59  | 79.93   | -2.05 | 0.000345 | 0.024133 |
| ENSOARG00000009290 | LRG1     | 204.88  | 37.35   | -5.49 | 0.000289 | 0.024133 |
| ENSOARG00000009527 | MARCKS   | 1631.95 | 2513.97 | 1.54  | 0.000351 | 0.024133 |
| ENSOARG00000006991 | MCM2     | 19.02   | 7.11    | -2.68 | 0.000381 | 0.024133 |
| ENSOARG00000001081 | MCOLN1   | 39.47   | 61.6    | 1.56  | 0.00039  | 0.024133 |
| ENSOARG00000012941 | MLEC     | 113.33  | 67.67   | -1.67 | 0.000355 | 0.024133 |
| ENSOARG00000018032 | NNAT     | 1297.92 | 174.92  | -7.42 | 0.00022  | 0.024133 |
| ENSOARG00000013368 | NR6A1    | 2.99    | 8.08    | 2.7   | 0.000252 | 0.024133 |
| ENSOARG00000004442 | PCCA     | 14.09   | 6.82    | -2.07 | 0.000187 | 0.024133 |
| ENSOARG00000003426 | PEG3     | 183.35  | 73.61   | -2.49 | 0.000322 | 0.024133 |
| ENSOARG00000019313 | PKP2     | 21.93   | 8.88    | -2.47 | 0.000356 | 0.024133 |
| ENSOARG00000002369 | PSMC3IP  | 8.78    | 2.4     | -3.66 | 0.000188 | 0.024133 |
| ENSOARG00000003025 | RHOU     | 67.07   | 156.89  | 2.34  | 0.00038  | 0.024133 |
| ENSOARG00000012938 | RNASE4   | 374.91  | 180.23  | -2.08 | 0.000201 | 0.024133 |
| ENSOARG00000014081 | SERPINF2 | 1309.68 | 705.95  | -1.86 | 0.00026  | 0.024133 |
| ENSOARG00000012527 | SFT2D2   | 18.63   | 8.3     | -2.24 | 0.000384 | 0.024133 |
| ENSOARG00000019435 | SIDT1    | 23.14   | 4.29    | -5.39 | 0.000388 | 0.024133 |
| ENSOARG00000017065 | SLC23A1  | 27.33   | 6.36    | -4.3  | 0.00037  | 0.024133 |
| ENSOARG00000008554 | SLC25A33 | 2.93    | 11.17   | 3.81  | 0.000329 | 0.024133 |
| ENSOARG00000006790 | SLFN13   | 15.32   | 2.54    | -6.03 | 0.000247 | 0.024133 |
| ENSOARG00000009745 | SMC3     | 48.31   | 28      | -1.73 | 0.000293 | 0.024133 |
| ENSOARG00000021059 | SORD     | 19.12   | 8.91    | -2.15 | 0.000361 | 0.024133 |
| ENSOARG00000013232 | SPATA13  | 11.86   | 5       | -2.37 | 0.000217 | 0.024133 |

|                    |          |        |        |       |          |          |
|--------------------|----------|--------|--------|-------|----------|----------|
| ENSOARG00000013667 | TBC1D17  | 40.07  | 60.14  | 1.5   | 0.000358 | 0.024133 |
| ENSOARG00000011970 | TESK1    | 23.09  | 38.9   | 1.68  | 0.000358 | 0.024133 |
| ENSOARG00000004707 | TOM1L1   | 34.97  | 87.6   | 2.51  | 0.000342 | 0.024133 |
| ENSOARG00000001419 | TPX2     | 18.09  | 8.62   | -2.1  | 0.000385 | 0.024133 |
| ENSOARG00000013795 | TRIM39   | 11.83  | 19.87  | 1.68  | 0.000267 | 0.024133 |
| ENSOARG00000020048 | VAMP8    | 36.36  | 20.09  | -1.81 | 0.0002   | 0.024133 |
| ENSOARG00000008301 | ZNRF2    | 23.31  | 49.74  | 2.13  | 0.000267 | 0.024133 |
| ENSOARG00000006128 | RNF125   | 40.58  | 87.94  | 2.17  | 0.000395 | 0.02419  |
| ENSOARG00000005002 | ALG1     | 23.19  | 15.16  | -1.53 | 0.00043  | 0.024423 |
| ENSOARG00000015183 | BCLAF3   | 10.38  | 17.7   | 1.71  | 0.000442 | 0.024423 |
| ENSOARG00000013070 | C1orf115 | 142.57 | 51.13  | -2.79 | 0.00042  | 0.024423 |
| ENSOARG00000019659 | PIM3     | 69.72  | 119.47 | 1.71  | 0.000422 | 0.024423 |
| ENSOARG00000017955 | PRDM4    | 9.69   | 15.87  | 1.64  | 0.000409 | 0.024423 |
| ENSOARG00000004957 | PRKAR2B  | 19.5   | 11.69  | -1.67 | 0.000413 | 0.024423 |
| ENSOARG00000008471 | RAP1GAP  | 9.9    | 3.47   | -2.85 | 0.000435 | 0.024423 |
| ENSOARG00000012743 | RNF6     | 13.96  | 23.07  | 1.65  | 0.000442 | 0.024423 |
| ENSOARG00000006252 | RRNAD1   | 12.37  | 22.72  | 1.84  | 0.000414 | 0.024423 |
| ENSOARG00000014224 | SLC4A7   | 17.01  | 37.49  | 2.2   | 0.000442 | 0.024423 |
| ENSOARG00000012635 | RABGGTB  | 20.08  | 53.08  | 2.64  | 0.000447 | 0.024478 |
| ENSOARG00000017954 | ACSL4    | 263.86 | 110.87 | -2.38 | 0.000457 | 0.024532 |
| ENSOARG00000018139 | GCGR     | 56.45  | 27.36  | -2.06 | 0.000463 | 0.024532 |
| ENSOARG00000004347 | MSX2     | 4.71   | 33.35  | 7.08  | 0.000464 | 0.024532 |
| ENSOARG00000015939 | RABGGTB  | 41.43  | 111.72 | 2.7   | 0.000463 | 0.024532 |
| ENSOARG00000012705 | ALDH1A1  | 49.15  | 18.8   | -2.61 | 0.00048  | 0.024762 |
| ENSOARG00000012263 | BCL7A    | 11.08  | 17.5   | 1.58  | 0.000476 | 0.024762 |
| ENSOARG00000008650 | FBP1     | 145.75 | 36.46  | -4    | 0.000487 | 0.024762 |
| ENSOARG00000020715 | RMND5A   | 56.83  | 116.51 | 2.05  | 0.000493 | 0.024762 |
| ENSOARG00000014815 | IFIT5    | 83.9   | 41.61  | -2.02 | 0.000503 | 0.024864 |
| ENSOARG00000013661 | NEK6     | 71.46  | 38.02  | -1.88 | 0.000502 | 0.024864 |
| ENSOARG00000004505 | PRKAG2   | 44.43  | 80.54  | 1.81  | 0.000512 | 0.025049 |
| ENSOARG00000009053 | RNF126   | 40.67  | 62.8   | 1.54  | 0.000519 | 0.025049 |
| ENSOARG00000003804 | SEMA7A   | 30.43  | 57.49  | 1.89  | 0.000515 | 0.025049 |
| ENSOARG00000002446 | GOLT1A   | 9.99   | 2.51   | -3.98 | 0.000542 | 0.025085 |
| ENSOARG00000013956 | LGALS1   | 526.05 | 344.5  | -1.53 | 0.000527 | 0.025085 |
| ENSOARG00000005789 | MED13L   | 10.86  | 18.82  | 1.73  | 0.000552 | 0.025085 |
| ENSOARG00000002526 | TAOK3    | 13.59  | 21.74  | 1.6   | 0.000536 | 0.025085 |
| ENSOARG00000002508 | TPRN     | 15.5   | 24.64  | 1.59  | 0.000533 | 0.025085 |
| ENSOARG00000017433 | ZSWIM7   | 17.72  | 11.55  | -1.53 | 0.000552 | 0.025085 |
| ENSOARG00000007741 | SECISBP2 | 17.08  | 31.1   | 1.82  | 0.000558 | 0.02518  |
| ENSOARG00000001799 | AOC1     | 80.04  | 8.17   | -9.8  | 0.00059  | 0.025392 |
| ENSOARG00000018897 | IFT57    | 11.2   | 34.22  | 3.06  | 0.000584 | 0.025392 |
| ENSOARG00000013225 | PRR3     | 18.42  | 10.38  | -1.77 | 0.000585 | 0.025392 |
| ENSOARG00000001395 | TINAGL1  | 33.37  | 59.19  | 1.77  | 0.000584 | 0.025392 |

|                    |          |        |         |       |          |          |
|--------------------|----------|--------|---------|-------|----------|----------|
| ENSOARG00000001345 | TPH1     | 34.84  | 7.48    | -4.66 | 0.000582 | 0.025392 |
| ENSOARG00000009543 | UCKL1    | 7.47   | 15.72   | 2.1   | 0.000591 | 0.025392 |
| ENSOARG00000018095 | ABCA3    | 44.61  | 24.83   | -1.8  | 0.000635 | 0.025452 |
| ENSOARG00000013395 | CEBPB    | 126.67 | 218.99  | 1.73  | 0.000653 | 0.025452 |
| ENSOARG00000016505 | CPT1A    | 49.95  | 15.71   | -3.18 | 0.000679 | 0.025452 |
| ENSOARG00000001610 | CRTC2    | 49.49  | 79.79   | 1.61  | 0.00064  | 0.025452 |
| ENSOARG00000003963 | DUSP1    | 72.6   | 196.57  | 2.71  | 0.000651 | 0.025452 |
| ENSOARG00000010135 | F5       | 65.32  | 147.53  | 2.26  | 0.000687 | 0.025452 |
| ENSOARG00000008161 | FGD3     | 15.33  | 7.53    | -2.04 | 0.00068  | 0.025452 |
| ENSOARG00000006340 | GAB2     | 29.8   | 132.74  | 4.45  | 0.000659 | 0.025452 |
| ENSOARG00000021078 | GCH1     | 23.89  | 80.21   | 3.36  | 0.000641 | 0.025452 |
| ENSOARG00000001374 | HCRT1    | 9.11   | 28.33   | 3.11  | 0.000674 | 0.025452 |
| ENSOARG00000009757 | MARK4    | 9.42   | 22.42   | 2.38  | 0.000663 | 0.025452 |
| ENSOARG00000004930 | MMP12    | 200.36 | 374.29  | 1.87  | 0.000682 | 0.025452 |
| ENSOARG00000000803 | MTCL1    | 8.52   | 14.05   | 1.65  | 0.00066  | 0.025452 |
| ENSOARG00000018904 | PARP6    | 8.95   | 22.07   | 2.47  | 0.000638 | 0.025452 |
| ENSOARG00000012005 | PATL1    | 58.48  | 109.69  | 1.88  | 0.00068  | 0.025452 |
| ENSOARG00000015144 | SERPINA5 | 459.98 | 256.02  | -1.8  | 0.000675 | 0.025452 |
| ENSOARG00000014638 | SMARCA1  | 125.18 | 51.55   | -2.43 | 0.000608 | 0.025452 |
| ENSOARG00000000718 | TGDS     | 14.73  | 28.37   | 1.93  | 0.000687 | 0.025452 |
| ENSOARG00000014918 | TSHZ2    | 9.18   | 3.77    | -2.44 | 0.000657 | 0.025452 |
| ENSOARG00000000106 | VRK1     | 12.58  | 6.64    | -1.89 | 0.000671 | 0.025452 |
| ENSOARG00000006059 | BEND7    | 11.97  | 30.49   | 2.55  | 0.000702 | 0.025651 |
| ENSOARG00000004893 | CCL16    | 331.96 | 103.37  | -3.21 | 0.000708 | 0.025651 |
| ENSOARG00000026479 | -        | 10.07  | 18.57   | 1.84  | 0.000772 | 0.026059 |
| ENSOARG00000013680 | -        | 33.02  | 9.09    | -3.63 | 0.000911 | 0.026059 |
| ENSOARG00000014967 | AHI1     | 4.62   | 11.68   | 2.53  | 0.000781 | 0.026059 |
| ENSOARG00000011321 | AK1      | 9.99   | 4.22    | -2.37 | 0.000868 | 0.026059 |
| ENSOARG00000006313 | ALDH18A1 | 21.64  | 11.81   | -1.83 | 0.000873 | 0.026059 |
| ENSOARG00000015052 | AREG     | 1.22   | 27.52   | 22.56 | 0.000759 | 0.026059 |
| ENSOARG00000018429 | ARHGEF5  | 34.62  | 76.21   | 2.2   | 0.000743 | 0.026059 |
| ENSOARG00000007209 | CTSF     | 55.81  | 34.27   | -1.63 | 0.000922 | 0.026059 |
| ENSOARG00000003603 | DPYSL3   | 10.49  | 4.6     | -2.28 | 0.000847 | 0.026059 |
| ENSOARG00000020569 | EHHADH   | 57     | 20.85   | -2.73 | 0.000793 | 0.026059 |
| ENSOARG00000017480 | ELL2     | 28.55  | 62.02   | 2.17  | 0.000856 | 0.026059 |
| ENSOARG00000003522 | FGFR4    | 11.83  | 5.45    | -2.17 | 0.000893 | 0.026059 |
| ENSOARG00000004552 | GPSM1    | 16.25  | 34.13   | 2.1   | 0.000834 | 0.026059 |
| ENSOARG00000014759 | GSTA1-1  | 99.38  | 25.06   | -3.97 | 0.00088  | 0.026059 |
| ENSOARG00000011926 | KATNAL1  | 5.95   | 21.72   | 3.65  | 0.00085  | 0.026059 |
| ENSOARG00000018403 | KIAA1614 | 5.1    | 10.73   | 2.1   | 0.00089  | 0.026059 |
| ENSOARG00000015370 | KLHL3    | 8.63   | 3.51    | -2.46 | 0.000917 | 0.026059 |
| ENSOARG00000004639 | KLHL8    | 4.49   | 11.26   | 2.51  | 0.000909 | 0.026059 |
| ENSOARG00000021088 | LGALS3   | 811.37 | 2070.43 | 2.55  | 0.000771 | 0.026059 |

|                     |         |         |        |       |          |          |
|---------------------|---------|---------|--------|-------|----------|----------|
| ENSOARG00000002988  | MAP2K7  | 21.23   | 31.92  | 1.5   | 0.000863 | 0.026059 |
| ENSOARG000000018527 | MCM5    | 48.7    | 19.11  | -2.55 | 0.000921 | 0.026059 |
| ENSOARG000000010614 | MCM6    | 39.77   | 21.44  | -1.85 | 0.000877 | 0.026059 |
| ENSOARG000000005046 | MSH6    | 59.55   | 33.46  | -1.78 | 0.000741 | 0.026059 |
| ENSOARG000000008341 | MTURN   | 34.19   | 96.75  | 2.83  | 0.000926 | 0.026059 |
| ENSOARG000000007925 | PCCB    | 29.2    | 16.07  | -1.82 | 0.000852 | 0.026059 |
| ENSOARG000000018226 | RAPH1   | 11.89   | 26.65  | 2.24  | 0.000883 | 0.026059 |
| ENSOARG000000019098 | RND1    | 10.96   | 3.59   | -3.05 | 0.000801 | 0.026059 |
| ENSOARG000000014479 | RPA1    | 47.88   | 28.95  | -1.65 | 0.000746 | 0.026059 |
| ENSOARG000000020560 | SENP2   | 28.62   | 54.26  | 1.9   | 0.000762 | 0.026059 |
| ENSOARG000000020892 | SLC20A1 | 100.32  | 448.98 | 4.48  | 0.000811 | 0.026059 |
| ENSOARG000000018282 | SLC46A1 | 10.58   | 3.72   | -2.84 | 0.000728 | 0.026059 |
| ENSOARG000000001352 | SMG7    | 37.98   | 88.32  | 2.33  | 0.000888 | 0.026059 |
| ENSOARG000000017725 | SPC24   | 22      | 7.89   | -2.79 | 0.00075  | 0.026059 |
| ENSOARG000000002680 | TIAL1   | 92.33   | 140.94 | 1.53  | 0.000923 | 0.026059 |
| ENSOARG000000005673 | TK1     | 20.97   | 8.2    | -2.56 | 0.000866 | 0.026059 |
| ENSOARG000000016617 | TRANK1  | 27.34   | 6.36   | -4.3  | 0.000907 | 0.026059 |
| ENSOARG000000020658 | TXNIP   | 40.74   | 6.94   | -5.87 | 0.000837 | 0.026059 |
| ENSOARG000000020687 | USP13   | 5.32    | 20.73  | 3.9   | 0.000793 | 0.026059 |
| ENSOARG000000005787 | WFS1    | 70.14   | 209.8  | 2.99  | 0.000906 | 0.026059 |
| ENSOARG000000004046 | ACAA2   | 63.89   | 32.02  | -2    | 0.000996 | 0.02618  |
| ENSOARG000000010662 | ACADVL  | 101.92  | 47.23  | -2.16 | 0.000985 | 0.02618  |
| ENSOARG000000014252 | ACER2   | 19.6    | 10.44  | -1.88 | 0.001016 | 0.02618  |
| ENSOARG000000009382 | AGMAT   | 29.76   | 12.61  | -2.36 | 0.001195 | 0.02618  |
| ENSOARG000000018314 | AGXT    | 47.09   | 14.51  | -3.25 | 0.001238 | 0.02618  |
| ENSOARG000000006134 | AMBP    | 1659.42 | 818.31 | -2.03 | 0.001184 | 0.02618  |
| ENSOARG000000002530 | ANKRD49 | 12.87   | 6.45   | -2    | 0.001201 | 0.02618  |
| ENSOARG000000015185 | ARSG    | 20.28   | 7.55   | -2.69 | 0.001239 | 0.02618  |
| ENSOARG000000019420 | ATXN10  | 177.55  | 105.28 | -1.69 | 0.001092 | 0.02618  |
| ENSOARG000000005582 | C5      | 98.28   | 23.77  | -4.13 | 0.001219 | 0.02618  |
| ENSOARG000000000578 | CDCA7   | 8.03    | 2.12   | -3.79 | 0.001145 | 0.02618  |
| ENSOARG000000010667 | CDK2    | 19.12   | 11.79  | -1.62 | 0.00122  | 0.02618  |
| ENSOARG000000007893 | CEP170B | 31.31   | 54.32  | 1.73  | 0.001    | 0.02618  |
| ENSOARG000000025184 | CLDN4   | 498.07  | 880.83 | 1.77  | 0.001196 | 0.02618  |
| ENSOARG000000004348 | CLYBL   | 15.55   | 24.25  | 1.56  | 0.000996 | 0.02618  |
| ENSOARG000000018283 | CYP3A4  | 19.91   | 129.87 | 6.52  | 0.001077 | 0.02618  |
| ENSOARG000000007485 | DCDC2   | 75.8    | 21.95  | -3.45 | 0.001063 | 0.02618  |
| ENSOARG000000011989 | DECR2   | 87.94   | 30.15  | -2.92 | 0.001031 | 0.02618  |
| ENSOARG000000015380 | DNMT1   | 26.48   | 15.27  | -1.73 | 0.001042 | 0.02618  |
| ENSOARG000000004051 | DVL1    | 22.98   | 46.99  | 2.04  | 0.001188 | 0.02618  |
| ENSOARG000000015811 | EEA1    | 20.49   | 43.11  | 2.1   | 0.001164 | 0.02618  |
| ENSOARG000000003585 | ELMO1   | 30.99   | 18.29  | -1.69 | 0.001219 | 0.02618  |
| ENSOARG000000017468 | EPHX1   | 287.52  | 90.39  | -3.18 | 0.001184 | 0.02618  |

|                    |            |         |        |       |          |          |
|--------------------|------------|---------|--------|-------|----------|----------|
| ENSOARG00000004548 | FAM50A     | 9.99    | 15.12  | 1.51  | 0.001253 | 0.02618  |
| ENSOARG00000020524 | FMO5       | 10.48   | 5.46   | -1.92 | 0.001102 | 0.02618  |
| ENSOARG00000008869 | FUS        | 74.61   | 41.64  | -1.79 | 0.001248 | 0.02618  |
| ENSOARG00000008843 | GALM       | 97.12   | 20.99  | -4.63 | 0.001219 | 0.02618  |
| ENSOARG00000021045 | GATM       | 380.79  | 193.8  | -1.96 | 0.001065 | 0.02618  |
| ENSOARG00000007066 | GLTPD2     | 25.77   | 5.51   | -4.68 | 0.001168 | 0.02618  |
| ENSOARG00000017584 | GSTA1      | 73.06   | 20.77  | -3.52 | 0.001027 | 0.02618  |
| ENSOARG00000019925 | HGD        | 20.8    | 5.15   | -4.04 | 0.001125 | 0.02618  |
| ENSOARG00000004689 | HPN        | 216.72  | 127.25 | -1.7  | 0.001163 | 0.02618  |
| ENSOARG00000001872 | HSPB8      | 257.02  | 718.21 | 2.79  | 0.000979 | 0.02618  |
| ENSOARG00000016268 | IDUA       | 54.89   | 34.35  | -1.6  | 0.000965 | 0.02618  |
| ENSOARG00000017793 | IRF2BP2    | 265.74  | 474    | 1.78  | 0.001226 | 0.02618  |
| ENSOARG00000005030 | KCTD13     | 8.57    | 14.33  | 1.67  | 0.001005 | 0.02618  |
| ENSOARG00000008250 | KLKB1      | 16.91   | 4.72   | -3.58 | 0.00108  | 0.02618  |
| ENSOARG00000016786 | KRT8       | 1956.31 | 591.94 | -3.3  | 0.0011   | 0.02618  |
| ENSOARG00000002925 | LENG1      | 24.51   | 75.99  | 3.1   | 0.00122  | 0.02618  |
| ENSOARG00000015564 | LRRC8B     | 8.55    | 14.67  | 1.72  | 0.000941 | 0.02618  |
| ENSOARG00000009525 | MAL2       | 12.98   | 4.71   | -2.76 | 0.001145 | 0.02618  |
| ENSOARG00000006166 | MLKL       | 12.52   | 5.74   | -2.18 | 0.001134 | 0.02618  |
| ENSOARG00000020160 | PARP14     | 17.88   | 9.61   | -1.86 | 0.001192 | 0.02618  |
| ENSOARG00000020743 | PCLAF      | 8.48    | 2.19   | -3.87 | 0.001143 | 0.02618  |
| ENSOARG00000018444 | PDZD8      | 18.31   | 30.5   | 1.67  | 0.001105 | 0.02618  |
| ENSOARG00000013082 | PFKFB3     | 23.25   | 82.66  | 3.56  | 0.001189 | 0.02618  |
| ENSOARG00000017897 | PFKFB4     | 7.55    | 20.14  | 2.67  | 0.000948 | 0.02618  |
| ENSOARG00000011093 | PI4K2A     | 23.1    | 76.03  | 3.29  | 0.001127 | 0.02618  |
| ENSOARG00000005810 | PRCP       | 24.37   | 14.62  | -1.67 | 0.001014 | 0.02618  |
| ENSOARG00000000907 | PWWP3B     | 30.89   | 17.59  | -1.76 | 0.001039 | 0.02618  |
| ENSOARG00000006929 | R3HDM2     | 53.19   | 99.08  | 1.86  | 0.001043 | 0.02618  |
| ENSOARG00000001748 | RASD1      | 4.4     | 28.13  | 6.39  | 0.001094 | 0.02618  |
| ENSOARG00000009070 | RPL7L1     | 71.79   | 46.15  | -1.56 | 0.001142 | 0.02618  |
| ENSOARG00000017517 | SERINC5    | 57.92   | 137.43 | 2.37  | 0.001239 | 0.02618  |
| ENSOARG00000002378 | SGCE       | 155.66  | 46.64  | -3.34 | 0.001091 | 0.02618  |
| ENSOARG00000012076 | SKA2       | 12.66   | 4.77   | -2.65 | 0.000996 | 0.02618  |
| ENSOARG00000011307 | ST6GALNAC6 | 75.84   | 25.34  | -2.99 | 0.000981 | 0.02618  |
| ENSOARG00000008907 | TIMELESS   | 19.1    | 9      | -2.12 | 0.001157 | 0.02618  |
| ENSOARG00000004881 | TM4SF1     | 133.85  | 698.25 | 5.22  | 0.001145 | 0.02618  |
| ENSOARG00000012428 | URAD       | 24.54   | 2.76   | -8.89 | 0.001224 | 0.02618  |
| ENSOARG00000018303 | VCAM1      | 32.33   | 8.24   | -3.92 | 0.001146 | 0.02618  |
| ENSOARG00000007041 | ZNF384     | 31.89   | 49.93  | 1.57  | 0.001077 | 0.02618  |
| ENSOARG00000013628 | IL33       | 10.12   | 2.11   | -4.8  | 0.001266 | 0.026347 |
| ENSOARG00000019417 | IGFBP2     | 1204.62 | 638.69 | -1.89 | 0.001288 | 0.026641 |
| ENSOARG00000020498 | MASP1      | 57.43   | 21.57  | -2.66 | 0.001304 | 0.026697 |
| ENSOARG00000002482 | SASH1      | 32.84   | 58.11  | 1.77  | 0.001297 | 0.026697 |

|                     |          |        |        |        |          |          |
|---------------------|----------|--------|--------|--------|----------|----------|
| ENSOARG00000001230  | -        | 12.29  | 6.86   | -1.79  | 0.001764 | 0.026729 |
| ENSOARG000000013325 | -        | 11.52  | 5.87   | -1.96  | 0.001509 | 0.026729 |
| ENSOARG00000002038  | -        | 17.39  | 7.86   | -2.21  | 0.002264 | 0.026729 |
| ENSOARG000000015186 | ACSS3    | 49.23  | 13.62  | -3.61  | 0.002019 | 0.026729 |
| ENSOARG000000015738 | ADH5     | 141.58 | 72.35  | -1.96  | 0.002125 | 0.026729 |
| ENSOARG000000004375 | AHCYL2   | 6.71   | 15.75  | 2.35   | 0.00228  | 0.026729 |
| ENSOARG000000012967 | AKIRIN2  | 59.64  | 106.44 | 1.78   | 0.002122 | 0.026729 |
| ENSOARG000000001793 | AKR1A1   | 149.33 | 79.8   | -1.87  | 0.001803 | 0.026729 |
| ENSOARG000000014292 | ALDH3B1  | 11.95  | 22.29  | 1.87   | 0.001708 | 0.026729 |
| ENSOARG000000004068 | AP1B1    | 52.4   | 34.9   | -1.5   | 0.001549 | 0.026729 |
| ENSOARG000000016832 | ATP6V1C1 | 39.8   | 119.53 | 3      | 0.002176 | 0.026729 |
| ENSOARG000000005403 | BACE1    | 27.03  | 10.19  | -2.65  | 0.001782 | 0.026729 |
| ENSOARG000000019968 | BHLHE41  | 13.39  | 94.03  | 7.02   | 0.001884 | 0.026729 |
| ENSOARG000000008607 | BTBD6    | 50.93  | 191.86 | 3.77   | 0.001668 | 0.026729 |
| ENSOARG000000020341 | C3AR1    | 12.97  | 5.48   | -2.37  | 0.002295 | 0.026729 |
| ENSOARG000000009848 | C5orf51  | 16.17  | 25.62  | 1.58   | 0.001485 | 0.026729 |
| ENSOARG000000009262 | CARD6    | 19.64  | 11.46  | -1.71  | 0.001871 | 0.026729 |
| ENSOARG000000018566 | CAT      | 241.9  | 91.15  | -2.65  | 0.002205 | 0.026729 |
| ENSOARG000000016355 | CCDC112  | 5.08   | 18.64  | 3.67   | 0.0017   | 0.026729 |
| ENSOARG000000015247 | CCDC59   | 23.99  | 40.04  | 1.67   | 0.002249 | 0.026729 |
| ENSOARG000000005310 | CCDC90B  | 19.22  | 31.53  | 1.64   | 0.001606 | 0.026729 |
| ENSOARG000000007385 | CCS      | 45.27  | 24.25  | -1.87  | 0.002111 | 0.026729 |
| ENSOARG000000009256 | CD3G     | 0.86   | 6.01   | 6.99   | 0.001796 | 0.026729 |
| ENSOARG000000015982 | CDC23    | 9.42   | 3.94   | -2.39  | 0.001965 | 0.026729 |
| ENSOARG000000008840 | CEP57    | 18.59  | 34.55  | 1.86   | 0.001991 | 0.026729 |
| ENSOARG000000009704 | CHAF1A   | 12.5   | 4.67   | -2.68  | 0.002106 | 0.026729 |
| ENSOARG000000011655 | CHEK1    | 18.03  | 4.81   | -3.75  | 0.001879 | 0.026729 |
| ENSOARG000000015196 | CHPT1    | 71.38  | 45.85  | -1.56  | 0.002195 | 0.026729 |
| ENSOARG000000014144 | CMBL     | 33.8   | 16.27  | -2.08  | 0.001851 | 0.026729 |
| ENSOARG000000007390 | COPZ2    | 50.41  | 17.13  | -2.94  | 0.001956 | 0.026729 |
| ENSOARG000000001499 | COQ8A    | 10.37  | 2.95   | -3.52  | 0.002161 | 0.026729 |
| ENSOARG000000018900 | CPNE2    | 45.92  | 23.17  | -1.98  | 0.001964 | 0.026729 |
| ENSOARG000000006212 | CRABP2   | 25.87  | 266.74 | 10.31  | 0.002    | 0.026729 |
| ENSOARG000000004089 | CREBRF   | 7.52   | 18.57  | 2.47   | 0.002302 | 0.026729 |
| ENSOARG000000005465 | CRELD1   | 15.22  | 9.27   | -1.64  | 0.002026 | 0.026729 |
| ENSOARG000000001260 | CSNK2A2  | 45.23  | 72.1   | 1.59   | 0.001864 | 0.026729 |
| ENSOARG000000003754 | CTIF     | 17.16  | 30.7   | 1.79   | 0.002315 | 0.026729 |
| ENSOARG000000016543 | CXCL9    | 11.01  | 2.36   | -4.67  | 0.001642 | 0.026729 |
| ENSOARG000000011582 | CYP26B1  | 3.87   | 11.12  | 2.87   | 0.001914 | 0.026729 |
| ENSOARG000000011455 | DDX6     | 58.66  | 33.21  | -1.77  | 0.001575 | 0.026729 |
| ENSOARG000000010122 | DIRAS3   | 527.05 | 52.41  | -10.06 | 0.001514 | 0.026729 |
| ENSOARG000000018256 | DMD      | 25.23  | 63.6   | 2.52   | 0.00147  | 0.026729 |
| ENSOARG000000000742 | DNAJA4   | 6.15   | 14.87  | 2.42   | 0.001507 | 0.026729 |

|                    |         |         |        |       |          |          |
|--------------------|---------|---------|--------|-------|----------|----------|
| ENSOARG00000018798 | DNAJC22 | 46.93   | 25.58  | -1.83 | 0.001998 | 0.026729 |
| ENSOARG00000007522 | DNAJC9  | 21.17   | 10.7   | -1.98 | 0.001391 | 0.026729 |
| ENSOARG00000007360 | DUSP9   | 91.11   | 21.89  | -4.16 | 0.001891 | 0.026729 |
| ENSOARG00000006176 | DYRK3   | 11.82   | 45.94  | 3.89  | 0.002149 | 0.026729 |
| ENSOARG00000015090 | EAF1    | 58.59   | 113.2  | 1.93  | 0.0022   | 0.026729 |
| ENSOARG00000018622 | EEF1B2  | 318.48  | 511.43 | 1.61  | 0.0015   | 0.026729 |
| ENSOARG00000011109 | EEF2    | 341.97  | 563.43 | 1.65  | 0.002002 | 0.026729 |
| ENSOARG00000003647 | EFNA1   | 76.28   | 26.4   | -2.89 | 0.002159 | 0.026729 |
| ENSOARG00000020774 | EIF2AK3 | 44.43   | 243.66 | 5.48  | 0.001352 | 0.026729 |
| ENSOARG00000016759 | EIF4B   | 258.34  | 409.05 | 1.58  | 0.001569 | 0.026729 |
| ENSOARG00000015457 | ENPP2   | 43.3    | 27.17  | -1.59 | 0.002182 | 0.026729 |
| ENSOARG00000006143 | EPS8L2  | 56.73   | 16.85  | -3.37 | 0.001381 | 0.026729 |
| ENSOARG00000000701 | ERLIN2  | 60.76   | 35.02  | -1.74 | 0.002215 | 0.026729 |
| ENSOARG00000020117 | ETNK1   | 26.7    | 11.11  | -2.4  | 0.002193 | 0.026729 |
| ENSOARG00000003642 | EWSR1   | 45.58   | 26.04  | -1.75 | 0.002152 | 0.026729 |
| ENSOARG00000007822 | F10     | 29.57   | 15.13  | -1.95 | 0.002152 | 0.026729 |
| ENSOARG00000011071 | FAM102A | 9.18    | 21.11  | 2.3   | 0.001414 | 0.026729 |
| ENSOARG00000018480 | FAM83G  | 7.31    | 15.88  | 2.17  | 0.00233  | 0.026729 |
| ENSOARG00000013413 | FBXL12  | 19.18   | 11.66  | -1.64 | 0.001724 | 0.026729 |
| ENSOARG00000016187 | FNIP1   | 20.32   | 73.94  | 3.64  | 0.001371 | 0.026729 |
| ENSOARG00000003354 | FNIP2   | 14.97   | 46.1   | 3.08  | 0.001711 | 0.026729 |
| ENSOARG00000020401 | FOXJ3   | 15.34   | 33.47  | 2.18  | 0.001443 | 0.026729 |
| ENSOARG00000011687 | GAMT    | 285.83  | 74.33  | -3.85 | 0.001413 | 0.026729 |
| ENSOARG00000007839 | GEM     | 7.85    | 46.15  | 5.88  | 0.002301 | 0.026729 |
| ENSOARG00000020518 | GGCX    | 64.19   | 17.7   | -3.63 | 0.001538 | 0.026729 |
| ENSOARG00000019976 | GLB1L   | 32.01   | 15.74  | -2.03 | 0.001398 | 0.026729 |
| ENSOARG00000008320 | GLUD1   | 1457.55 | 768.45 | -1.9  | 0.00233  | 0.026729 |
| ENSOARG00000000769 | GLUD1   | 711.54  | 368.29 | -1.93 | 0.001555 | 0.026729 |
| ENSOARG00000015323 | GNA13   | 50.18   | 84.72  | 1.69  | 0.001336 | 0.026729 |
| ENSOARG00000001069 | GOLIM4  | 166.28  | 89.59  | -1.86 | 0.00156  | 0.026729 |
| ENSOARG00000019513 | GRAMD1C | 12.85   | 4.72   | -2.72 | 0.001853 | 0.026729 |
| ENSOARG00000018452 | GRAMD2B | 27.24   | 48.55  | 1.78  | 0.001856 | 0.026729 |
| ENSOARG00000010736 | GSDME   | 13.01   | 61.21  | 4.7   | 0.00147  | 0.026729 |
| ENSOARG00000011276 | GTF2I   | 50.34   | 20.76  | -2.42 | 0.001816 | 0.026729 |
| ENSOARG00000007989 | GUCY1B1 | 28.98   | 60.1   | 2.07  | 0.00134  | 0.026729 |
| ENSOARG00000016724 | HMGCR   | 35.5    | 69.3   | 1.95  | 0.002051 | 0.026729 |
| ENSOARG00000003928 | HNF4A   | 54.96   | 11.73  | -4.69 | 0.002175 | 0.026729 |
| ENSOARG00000003368 | HNRNPH1 | 158.74  | 79.3   | -2    | 0.001573 | 0.026729 |
| ENSOARG00000010934 | HOGA1   | 48.71   | 27.81  | -1.75 | 0.002278 | 0.026729 |
| ENSOARG00000020096 | HPCAL4  | 4.09    | 11.47  | 2.8   | 0.001628 | 0.026729 |
| ENSOARG00000002580 | HS6ST3  | 27.71   | 11.33  | -2.45 | 0.002096 | 0.026729 |
| ENSOARG00000000722 | HSD17B4 | 42.85   | 23.48  | -1.82 | 0.002305 | 0.026729 |
| ENSOARG00000016699 | IGFBP6  | 24.01   | 8.5    | -2.82 | 0.002055 | 0.026729 |



|                    |              |        |        |       |          |          |
|--------------------|--------------|--------|--------|-------|----------|----------|
| ENSOARG00000020462 | IL1RAP       | 35.59  | 75.32  | 2.12  | 0.001354 | 0.026729 |
| ENSOARG00000017475 | INHBA        | 5.72   | 21.54  | 3.77  | 0.001402 | 0.026729 |
| ENSOARG00000020473 | IRS1         | 63.99  | 230.38 | 3.6   | 0.001813 | 0.026729 |
| ENSOARG00000015960 | KCTD12       | 27.15  | 11.69  | -2.32 | 0.001652 | 0.026729 |
| ENSOARG00000014908 | LGR4         | 59.84  | 24.81  | -2.41 | 0.001943 | 0.026729 |
| ENSOARG00000020371 | LOC101101862 | 23.68  | 7.92   | -2.99 | 0.001426 | 0.026729 |
| ENSOARG00000013927 | LOC101104530 | 85.69  | 44.97  | -1.91 | 0.00153  | 0.026729 |
| ENSOARG00000009639 | LOC101106395 | 108.91 | 28.9   | -3.77 | 0.001519 | 0.026729 |
| ENSOARG00000009674 | LOC101112590 | 32.02  | 14.73  | -2.17 | 0.001435 | 0.026729 |
| ENSOARG00000013005 | LOC101114959 | 528.12 | 284.43 | -1.86 | 0.001912 | 0.026729 |
| ENSOARG00000017944 | LOC101116481 | 45.87  | 22.66  | -2.02 | 0.001846 | 0.026729 |
| ENSOARG00000018263 | LOC101119629 | 13.41  | 3.29   | -4.08 | 0.001916 | 0.026729 |
| ENSOARG00000009541 | LOC101122788 | 28.05  | 2.84   | -9.88 | 0.00226  | 0.026729 |
| ENSOARG00000006187 | MAPKAPK2     | 121.25 | 227.94 | 1.88  | 0.002302 | 0.026729 |
| ENSOARG00000010176 | MAT1A        | 82.89  | 8.72   | -9.51 | 0.002228 | 0.026729 |
| ENSOARG00000010156 | MBTPS1       | 46     | 25.96  | -1.77 | 0.001857 | 0.026729 |
| ENSOARG00000014143 | MCM3         | 33.94  | 13.85  | -2.45 | 0.001711 | 0.026729 |
| ENSOARG00000012797 | MCM4         | 42.32  | 14.81  | -2.86 | 0.001605 | 0.026729 |
| ENSOARG00000012750 | MCRIP2       | 17.81  | 31.63  | 1.78  | 0.001448 | 0.026729 |
| ENSOARG00000011803 | MEDAG        | 8.62   | 29.58  | 3.43  | 0.001893 | 0.026729 |
| ENSOARG00000005974 | MEF2D        | 25.1   | 44.43  | 1.77  | 0.001746 | 0.026729 |
| ENSOARG00000010010 | MFHAS1       | 29.16  | 69.16  | 2.37  | 0.001956 | 0.026729 |
| ENSOARG00000020169 | MFSD2A       | 3.7    | 9.95   | 2.69  | 0.002027 | 0.026729 |
| ENSOARG00000014837 | MGMT         | 13.3   | 5.59   | -2.38 | 0.001731 | 0.026729 |
| ENSOARG00000011022 | MORN4        | 9.88   | 29.96  | 3.03  | 0.001954 | 0.026729 |
| ENSOARG00000020147 | MYCL         | 5.78   | 17.26  | 2.99  | 0.002204 | 0.026729 |
| ENSOARG00000006006 | MYO18A       | 38.2   | 16.88  | -2.26 | 0.00187  | 0.026729 |
| ENSOARG00000016789 | NIPAL1       | 11.13  | 32.7   | 2.94  | 0.00206  | 0.026729 |
| ENSOARG00000004838 | NIPSNAP1     | 108.13 | 29.78  | -3.63 | 0.001404 | 0.026729 |
| ENSOARG00000010973 | OSGIN2       | 15.26  | 36.23  | 2.37  | 0.00138  | 0.026729 |
| ENSOARG00000015316 | OXR1         | 16     | 33.12  | 2.07  | 0.0016   | 0.026729 |
| ENSOARG00000005943 | PABPC1L2B    | 68.57  | 105.43 | 1.54  | 0.001735 | 0.026729 |
| ENSOARG00000015569 | PALLD        | 38.91  | 100.68 | 2.59  | 0.001611 | 0.026729 |
| ENSOARG00000006754 | PALM3        | 21.03  | 11.02  | -1.91 | 0.001595 | 0.026729 |
| ENSOARG00000018831 | PAQR3        | 5.37   | 11.5   | 2.14  | 0.002246 | 0.026729 |
| ENSOARG00000019705 | PCYOX1       | 76.77  | 23.3   | -3.29 | 0.001666 | 0.026729 |
| ENSOARG00000014364 | PIM1         | 38.54  | 207.19 | 5.38  | 0.002066 | 0.026729 |
| ENSOARG00000014688 | PLEKHF2      | 23.09  | 37.03  | 1.6   | 0.001345 | 0.026729 |
| ENSOARG00000008953 | PLEKHM2      | 61.71  | 183.32 | 2.97  | 0.001955 | 0.026729 |
| ENSOARG00000004726 | PLG          | 834.9  | 337.16 | -2.48 | 0.001758 | 0.026729 |
| ENSOARG00000006393 | PPP1R13B     | 25.28  | 63.34  | 2.51  | 0.001704 | 0.026729 |
| ENSOARG00000020179 | PPT1         | 127.05 | 80.9   | -1.57 | 0.001649 | 0.026729 |
| ENSOARG00000005847 | PRKCE        | 7.19   | 14.8   | 2.06  | 0.002312 | 0.026729 |

|                    |          |         |        |       |          |          |
|--------------------|----------|---------|--------|-------|----------|----------|
| ENSOARG00000017273 | PROS1    | 300.77  | 114.17 | -2.63 | 0.001814 | 0.026729 |
| ENSOARG00000009324 | PROX1    | 29.88   | 7.15   | -4.18 | 0.001754 | 0.026729 |
| ENSOARG00000003400 | RALGAPA2 | 22.6    | 55.07  | 2.44  | 0.001672 | 0.026729 |
| ENSOARG00000014228 | RBM18    | 21.11   | 32.44  | 1.54  | 0.001644 | 0.026729 |
| ENSOARG00000011940 | RBM24    | 1.13    | 14.3   | 12.65 | 0.002325 | 0.026729 |
| ENSOARG00000011358 | RFC1     | 27.63   | 18.16  | -1.52 | 0.002162 | 0.026729 |
| ENSOARG00000002486 | RRAD     | 17.67   | 93.73  | 5.3   | 0.002125 | 0.026729 |
| ENSOARG00000019959 | RRAGC    | 20.07   | 37.76  | 1.88  | 0.002021 | 0.026729 |
| ENSOARG00000007137 | RRAS2    | 72.59   | 142.52 | 1.96  | 0.002016 | 0.026729 |
| ENSOARG00000011735 | RUFY3    | 45.08   | 82.57  | 1.83  | 0.002239 | 0.026729 |
| ENSOARG00000007690 | S1PR3    | 43.6    | 13.94  | -3.13 | 0.001683 | 0.026729 |
| ENSOARG00000002967 | SARDH    | 12.15   | 3.9    | -3.12 | 0.002033 | 0.026729 |
| ENSOARG00000016798 | SAT1     | 1563.15 | 3088.4 | 1.98  | 0.002052 | 0.026729 |
| ENSOARG00000017139 | SCAMP1   | 10.68   | 19.11  | 1.79  | 0.001335 | 0.026729 |
| ENSOARG00000002761 | SCAMP5   | 19.37   | 11.84  | -1.64 | 0.00203  | 0.026729 |
| ENSOARG00000015743 | SELENOK  | 172.33  | 277.85 | 1.61  | 0.00213  | 0.026729 |
| ENSOARG00000015957 | SEMA4G   | 60.94   | 16.82  | -3.62 | 0.001466 | 0.026729 |
| ENSOARG00000019439 | SFPQ     | 139.48  | 76.87  | -1.81 | 0.001927 | 0.026729 |
| ENSOARG00000015031 | SH3BP5   | 17.22   | 67.69  | 3.93  | 0.002214 | 0.026729 |
| ENSOARG00000014510 | SLC18B1  | 18.18   | 10.28  | -1.77 | 0.00218  | 0.026729 |
| ENSOARG00000020171 | SLC22A15 | 3.96    | 16.92  | 4.27  | 0.002288 | 0.026729 |
| ENSOARG00000016084 | SLC25A20 | 21.14   | 10.36  | -2.04 | 0.002318 | 0.026729 |
| ENSOARG00000007688 | SLC25A6  | 622.86  | 1054.9 | 1.69  | 0.001475 | 0.026729 |
| ENSOARG00000018707 | SLC38A10 | 58.93   | 30.29  | -1.95 | 0.00186  | 0.026729 |
| ENSOARG00000020420 | SLCO1B3  | 30.78   | 11.44  | -2.69 | 0.002049 | 0.026729 |
| ENSOARG00000009436 | SLITRK4  | 120.77  | 49.89  | -2.42 | 0.001722 | 0.026729 |
| ENSOARG00000006758 | SNX6     | 40.92   | 62.12  | 1.52  | 0.00194  | 0.026729 |
| ENSOARG00000017940 | SRC      | 19.09   | 43.86  | 2.3   | 0.002044 | 0.026729 |
| ENSOARG00000015645 | SRRT     | 69.19   | 41.07  | -1.68 | 0.002125 | 0.026729 |
| ENSOARG00000003117 | SRSF6    | 79.73   | 38.83  | -2.05 | 0.001668 | 0.026729 |
| ENSOARG00000012855 | ST3GAL4  | 73.89   | 37.02  | -2    | 0.001384 | 0.026729 |
| ENSOARG00000011645 | STAM     | 29.69   | 78.89  | 2.66  | 0.001861 | 0.026729 |
| ENSOARG00000001511 | STAT3    | 108.43  | 72.39  | -1.5  | 0.001915 | 0.026729 |
| ENSOARG00000013903 | STAT4    | 76.55   | 33.3   | -2.3  | 0.001366 | 0.026729 |
| ENSOARG00000011811 | STEAP4   | 36.56   | 9.28   | -3.94 | 0.002267 | 0.026729 |
| ENSOARG00000003303 | STX12    | 42.11   | 82.13  | 1.95  | 0.002076 | 0.026729 |
| ENSOARG00000011468 | SULT2A1  | 10.43   | 26.86  | 2.58  | 0.001731 | 0.026729 |
| ENSOARG00000009182 | TAX1BP1  | 23.06   | 37.63  | 1.63  | 0.001411 | 0.026729 |
| ENSOARG00000008069 | TEAD1    | 14.01   | 22.67  | 1.62  | 0.0023   | 0.026729 |
| ENSOARG00000008441 | TFDP1    | 25.18   | 12.87  | -1.96 | 0.002252 | 0.026729 |
| ENSOARG00000015081 | TGFBI    | 121.13  | 69.31  | -1.75 | 0.00158  | 0.026729 |
| ENSOARG00000008707 | TICAM1   | 24.39   | 42.38  | 1.74  | 0.002131 | 0.026729 |
| ENSOARG00000016945 | TLCD5    | 8.96    | 26.66  | 2.98  | 0.001431 | 0.026729 |

|                    |          |        |       |       |          |          |
|--------------------|----------|--------|-------|-------|----------|----------|
| ENSOARG00000018695 | TLE3     | 13.77  | 25.18 | 1.83  | 0.001867 | 0.026729 |
| ENSOARG00000010665 | TMEM186  | 18.17  | 12    | -1.51 | 0.001392 | 0.026729 |
| ENSOARG00000008641 | TMEM267  | 39.66  | 21.53 | -1.84 | 0.002052 | 0.026729 |
| ENSOARG00000003661 | TOX2     | 6.23   | 54.8  | 8.8   | 0.001651 | 0.026729 |
| ENSOARG00000016897 | TRPV2    | 14.04  | 32.06 | 2.28  | 0.001803 | 0.026729 |
| ENSOARG00000010711 | TSPAN9   | 34.7   | 16    | -2.17 | 0.002255 | 0.026729 |
| ENSOARG00000001273 | TXNDC17  | 229.35 | 74.36 | -3.08 | 0.001782 | 0.026729 |
| ENSOARG00000017127 | TXNDC5   | 105.32 | 64.97 | -1.62 | 0.00216  | 0.026729 |
| ENSOARG00000007258 | UBE2O    | 16.63  | 56.29 | 3.38  | 0.002066 | 0.026729 |
| ENSOARG00000008530 | UHRF1    | 11.67  | 3.08  | -3.79 | 0.002259 | 0.026729 |
| ENSOARG00000014074 | UPB1     | 44.83  | 9.93  | -4.51 | 0.001612 | 0.026729 |
| ENSOARG00000019268 | USP40    | 20.8   | 10.96 | -1.9  | 0.001745 | 0.026729 |
| ENSOARG00000020536 | VAMP5    | 52.66  | 26.03 | -2.02 | 0.001357 | 0.026729 |
| ENSOARG00000008970 | VPS52    | 30.13  | 13.36 | -2.26 | 0.001619 | 0.026729 |
| ENSOARG00000020041 | VPS54    | 14.16  | 36.19 | 2.56  | 0.001914 | 0.026729 |
| ENSOARG00000020381 | WARS2    | 9.12   | 22.18 | 2.43  | 0.001836 | 0.026729 |
| ENSOARG00000006905 | WBP4     | 33.35  | 57.14 | 1.71  | 0.002037 | 0.026729 |
| ENSOARG00000008330 | WDR91    | 16.61  | 30.07 | 1.81  | 0.001985 | 0.026729 |
| ENSOARG00000006633 | YIPF1    | 11.71  | 6.12  | -1.91 | 0.002268 | 0.026729 |
| ENSOARG00000011043 | ZC3HAV1  | 48.7   | 24.35 | -2    | 0.001874 | 0.026729 |
| ENSOARG00000003315 | ZNF583   | 15.9   | 28.81 | 1.81  | 0.001468 | 0.026729 |
| ENSOARG00000017201 | ZNF598   | 17.5   | 35.32 | 2.02  | 0.001323 | 0.026729 |
| ENSOARG00000020704 | ZNF639   | 9.6    | 16.72 | 1.74  | 0.001936 | 0.026729 |
| ENSOARG00000010740 | ZRANB1   | 17.15  | 29.71 | 1.73  | 0.002003 | 0.026729 |
| ENSOARG00000009780 | ZRANB2   | 11.33  | 3.98  | -2.85 | 0.001433 | 0.026729 |
| ENSOARG00000015462 | COQ10B   | 12     | 35.72 | 2.98  | 0.00234  | 0.026791 |
| ENSOARG00000013883 | ARID5A   | 9.1    | 51.28 | 5.64  | 0.002365 | 0.026915 |
| ENSOARG00000013374 | CAPN5    | 22.67  | 13.47 | -1.68 | 0.002361 | 0.026915 |
| ENSOARG00000004601 | JMJD1C   | 25.87  | 42.76 | 1.65  | 0.002372 | 0.026915 |
| ENSOARG00000007339 | PLA2G12B | 51.54  | 27.27 | -1.89 | 0.002361 | 0.026915 |
| ENSOARG00000010311 | CIZ1     | 8.06   | 13.42 | 1.67  | 0.002385 | 0.026963 |
| ENSOARG00000003154 | ARHGAP21 | 30.43  | 72.3  | 2.38  | 0.00243  | 0.027105 |
| ENSOARG00000016023 | EPPK1    | 15.89  | 6     | -2.65 | 0.00243  | 0.027105 |
| ENSOARG00000009833 | MITF     | 18.38  | 31.08 | 1.69  | 0.002423 | 0.027105 |
| ENSOARG00000008715 | MTSS1    | 101.75 | 52.24 | -1.95 | 0.002418 | 0.027105 |
| ENSOARG00000001820 | NASP     | 24.23  | 13.08 | -1.85 | 0.002412 | 0.027105 |
| ENSOARG00000015129 | UTP14A   | 23.28  | 51.6  | 2.22  | 0.002416 | 0.027105 |
| ENSOARG00000010728 | ZCCHC8   | 20.12  | 34.89 | 1.73  | 0.002408 | 0.027105 |
| ENSOARG00000014910 | ELP3     | 44.03  | 22.87 | -1.93 | 0.00244  | 0.027131 |
| ENSOARG00000019784 | AAK1     | 7.93   | 39.24 | 4.95  | 0.002458 | 0.027281 |
| ENSOARG00000016935 | BCAR3    | 13.74  | 29.43 | 2.14  | 0.002472 | 0.027294 |
| ENSOARG00000008257 | -        | 18.18  | 8.37  | -2.17 | 0.002647 | 0.027418 |
| ENSOARG00000019387 | AJUBA    | 30.75  | 18.15 | -1.69 | 0.002548 | 0.027418 |

|                    |              |        |        |       |          |          |
|--------------------|--------------|--------|--------|-------|----------|----------|
| ENSOARG00000009458 | AQP7         | 11.38  | 42.82  | 3.76  | 0.002532 | 0.027418 |
| ENSOARG00000002448 | ATP8B2       | 23.1   | 13.41  | -1.72 | 0.0026   | 0.027418 |
| ENSOARG00000015268 | C11orf52     | 26.54  | 7.79   | -3.41 | 0.002595 | 0.027418 |
| ENSOARG00000003493 | CHTF8        | 69.82  | 30.35  | -2.3  | 0.002648 | 0.027418 |
| ENSOARG00000018063 | DGCR8        | 47.37  | 16.5   | -2.87 | 0.002571 | 0.027418 |
| ENSOARG00000014177 | DOT1L        | 30.2   | 107.85 | 3.57  | 0.002609 | 0.027418 |
| ENSOARG00000016161 | EPB41L4A     | 19.19  | 31.1   | 1.62  | 0.00252  | 0.027418 |
| ENSOARG00000015116 | GPAA1        | 57.97  | 37.36  | -1.55 | 0.002506 | 0.027418 |
| ENSOARG00000012554 | HABP2        | 261.44 | 93.03  | -2.81 | 0.002639 | 0.027418 |
| ENSOARG00000020951 | HDAC1        | 53.44  | 32.25  | -1.66 | 0.002579 | 0.027418 |
| ENSOARG00000001155 | HECA         | 24.4   | 39.41  | 1.62  | 0.002552 | 0.027418 |
| ENSOARG00000004593 | HEXB         | 99.81  | 207.45 | 2.08  | 0.00265  | 0.027418 |
| ENSOARG00000000285 | INSR         | 23.37  | 70.1   | 3     | 0.002602 | 0.027418 |
| ENSOARG00000006664 | LITAF        | 124.13 | 222.62 | 1.79  | 0.002562 | 0.027418 |
| ENSOARG00000020023 | MACF1        | 14.17  | 25.56  | 1.8   | 0.002572 | 0.027418 |
| ENSOARG00000005525 | MALT1        | 11     | 4.6    | -2.39 | 0.002617 | 0.027418 |
| ENSOARG00000018509 | MR1          | 27.77  | 17.95  | -1.55 | 0.002588 | 0.027418 |
| ENSOARG00000019377 | NEPRO        | 6.43   | 12.53  | 1.95  | 0.002645 | 0.027418 |
| ENSOARG00000009097 | OAS2         | 29.22  | 7.21   | -4.05 | 0.002631 | 0.027418 |
| ENSOARG00000000095 | PABPC1       | 260.6  | 433.86 | 1.66  | 0.00265  | 0.027418 |
| ENSOARG00000002732 | PANK3        | 8.79   | 15.36  | 1.75  | 0.002599 | 0.027418 |
| ENSOARG00000020873 | RNF19B       | 5.69   | 22.85  | 4.02  | 0.002639 | 0.027418 |
| ENSOARG00000003451 | SLC20A2      | 11.02  | 21.25  | 1.93  | 0.002602 | 0.027418 |
| ENSOARG00000009272 | SLC7A2       | 19.93  | 11.22  | -1.78 | 0.002492 | 0.027418 |
| ENSOARG00000010235 | TMF1         | 19.5   | 46.87  | 2.4   | 0.002512 | 0.027418 |
| ENSOARG00000014189 | USP6NL       | 16.14  | 33.49  | 2.07  | 0.002523 | 0.027418 |
| ENSOARG00000012140 | UTP14C       | 10.54  | 22.03  | 2.09  | 0.002517 | 0.027418 |
| ENSOARG00000013303 | VLDLR        | 50.17  | 138.33 | 2.76  | 0.002513 | 0.027418 |
| ENSOARG00000014107 | ZNF438       | 8.51   | 15.26  | 1.79  | 0.002628 | 0.027418 |
| ENSOARG00000017488 | CCND1        | 43.27  | 18.22  | -2.37 | 0.002712 | 0.027491 |
| ENSOARG00000004421 | CDKN2C       | 11.05  | 3.49   | -3.17 | 0.002716 | 0.027491 |
| ENSOARG00000020517 | EIF4A2       | 82.58  | 248.84 | 3.01  | 0.002693 | 0.027491 |
| ENSOARG00000008676 | LOC101102818 | 13.63  | 1.4    | -9.74 | 0.002699 | 0.027491 |
| ENSOARG00000019742 | MXD1         | 31.7   | 110.89 | 3.5   | 0.002711 | 0.027491 |
| ENSOARG00000001202 | PLK3         | 14.6   | 41.02  | 2.81  | 0.002695 | 0.027491 |
| ENSOARG00000010721 | RNASEH2A     | 21.89  | 9.06   | -2.42 | 0.002726 | 0.027491 |
| ENSOARG00000017466 | SGSM3        | 11.65  | 4.71   | -2.47 | 0.002695 | 0.027491 |
| ENSOARG00000001315 | SLC22A10     | 62.92  | 27.96  | -2.25 | 0.002667 | 0.027491 |
| ENSOARG00000019825 | TM7SF3       | 13.46  | 7.34   | -1.83 | 0.002702 | 0.027491 |
| ENSOARG00000002665 | TUBB4B       | 170.94 | 77.81  | -2.2  | 0.002718 | 0.027491 |
| ENSOARG00000011694 | B3GLCT       | 18.51  | 10.5   | -1.76 | 0.002766 | 0.027498 |
| ENSOARG00000017649 | CCNG2        | 10.7   | 30.45  | 2.85  | 0.002755 | 0.027498 |
| ENSOARG00000004690 | DNMT3B       | 55.58  | 91.5   | 1.65  | 0.002763 | 0.027498 |

|                     |         |        |        |        |          |          |
|---------------------|---------|--------|--------|--------|----------|----------|
| ENSOARG00000017782  | MAFG    | 23.28  | 59.36  | 2.55   | 0.002742 | 0.027498 |
| ENSOARG00000015147  | MTHFS   | 16.34  | 10.56  | -1.55  | 0.002737 | 0.027498 |
| ENSOARG00000018940  | SCLY    | 29.82  | 13.36  | -2.23  | 0.002764 | 0.027498 |
| ENSOARG00000008919  | SOCS7   | 8.59   | 16.36  | 1.9    | 0.002762 | 0.027498 |
| ENSOARG00000016058  | TEAD2   | 14.63  | 29.17  | 1.99   | 0.002764 | 0.027498 |
| ENSOARG00000014508  | PKIA    | 44.66  | 16.87  | -2.65  | 0.00278  | 0.027509 |
| ENSOARG00000018165  | RAB3D   | 105.12 | 68.91  | -1.53  | 0.002781 | 0.027509 |
| ENSOARG00000018462  | EIF4A2  | 121.53 | 379.77 | 3.12   | 0.00279  | 0.02753  |
| ENSOARG00000018880  | MAN2A1  | 73.21  | 44.16  | -1.66  | 0.002792 | 0.02753  |
| ENSOARG00000003360  | ESRP2   | 38.98  | 3.23   | -12.07 | 0.002797 | 0.027541 |
| ENSOARG00000015169  | IFIT2   | 42.92  | 20.15  | -2.13  | 0.002833 | 0.02759  |
| ENSOARG00000019346  | MREG    | 4.02   | 9.17   | 2.28   | 0.002809 | 0.02759  |
| ENSOARG00000006843  | NUMBL   | 11.48  | 59.13  | 5.15   | 0.002829 | 0.02759  |
| ENSOARG00000009085  | SESN3   | 56.1   | 21.52  | -2.61  | 0.002831 | 0.02759  |
| ENSOARG00000012881  | TEAD2   | 41.23  | 86.79  | 2.11   | 0.002841 | 0.027619 |
| ENSOARG00000002757  | MMP23B  | 25.23  | 12.01  | -2.1   | 0.002853 | 0.027651 |
| ENSOARG00000001369  | UBE2S   | 73.76  | 120.72 | 1.64   | 0.002851 | 0.027651 |
| ENSOARG000000025723 | -       | 56.76  | 24.51  | -2.32  | 0.002882 | 0.027802 |
| ENSOARG00000012060  | AMDHD1  | 26.83  | 4.16   | -6.45  | 0.002881 | 0.027802 |
| ENSOARG00000012380  | TBC1D9  | 29.24  | 60.87  | 2.08   | 0.002875 | 0.027802 |
| ENSOARG00000020954  | MAPK6   | 28.54  | 60.26  | 2.11   | 0.002911 | 0.027913 |
| ENSOARG00000019429  | OXA1L   | 82.52  | 130.42 | 1.58   | 0.002912 | 0.027913 |
| ENSOARG00000006004  | SCP2    | 79.85  | 32.78  | -2.44  | 0.002909 | 0.027913 |
| ENSOARG00000006500  | DDIT3   | 53.88  | 253.85 | 4.71   | 0.002939 | 0.027941 |
| ENSOARG00000003271  | EGLN1   | 60.28  | 30.29  | -1.99  | 0.002946 | 0.027941 |
| ENSOARG00000008372  | HTATIP2 | 33.55  | 15.14  | -2.22  | 0.002928 | 0.027941 |
| ENSOARG00000010979  | RHNO1   | 11.43  | 5.35   | -2.14  | 0.002947 | 0.027941 |
| ENSOARG00000008323  | SRSF1   | 167.52 | 72.08  | -2.32  | 0.002934 | 0.027941 |
| ENSOARG00000011806  | TSTD3   | 12.48  | 4.25   | -2.94  | 0.002951 | 0.027941 |
| ENSOARG00000007670  | UBALD2  | 102.05 | 262.26 | 2.57   | 0.002923 | 0.027941 |
| ENSOARG00000012486  | -       | 114.76 | 197.5  | 1.72   | 0.002973 | 0.027949 |
| ENSOARG00000014385  | ABCA6   | 54.16  | 15.96  | -3.39  | 0.003393 | 0.027949 |
| ENSOARG00000013004  | ABCC2   | 7.53   | 1.11   | -6.78  | 0.003312 | 0.027949 |
| ENSOARG00000005369  | ADI1    | 212.16 | 124.46 | -1.7   | 0.003123 | 0.027949 |
| ENSOARG00000014352  | ADRB2   | 13.85  | 40.43  | 2.92   | 0.003171 | 0.027949 |
| ENSOARG00000013966  | AFP     | 217.38 | 97.95  | -2.22  | 0.002973 | 0.027949 |
| ENSOARG00000003763  | AGO2    | 18.06  | 51.73  | 2.86   | 0.002981 | 0.027949 |
| ENSOARG00000015422  | AIFM1   | 44.42  | 27.23  | -1.63  | 0.003435 | 0.027949 |
| ENSOARG00000007961  | AKAP17A | 7.7    | 13.32  | 1.73   | 0.003194 | 0.027949 |
| ENSOARG00000006253  | ANGPT2  | 21.52  | 46.14  | 2.14   | 0.003437 | 0.027949 |
| ENSOARG00000002688  | ANK1    | 6.94   | 16.94  | 2.44   | 0.003346 | 0.027949 |
| ENSOARG00000002515  | APOC3   | 331.33 | 194.93 | -1.7   | 0.003201 | 0.027949 |
| ENSOARG00000003906  | ARHGAP1 | 45.12  | 24.13  | -1.87  | 0.003319 | 0.027949 |

|                    |          |        |        |       |          |          |
|--------------------|----------|--------|--------|-------|----------|----------|
| ENSOARG00000003561 | ARHGEF26 | 10.19  | 3.15   | -3.23 | 0.002961 | 0.027949 |
| ENSOARG00000002541 | AS3MT    | 26.55  | 11.93  | -2.23 | 0.003158 | 0.027949 |
| ENSOARG00000010137 | ASGR1    | 60.14  | 23.72  | -2.54 | 0.003019 | 0.027949 |
| ENSOARG00000019931 | C1D      | 40.56  | 74.39  | 1.83  | 0.003127 | 0.027949 |
| ENSOARG00000004913 | CAMSAP1  | 9.16   | 17.16  | 1.87  | 0.003352 | 0.027949 |
| ENSOARG00000009257 | CDC73    | 22.82  | 38.32  | 1.68  | 0.003158 | 0.027949 |
| ENSOARG00000014909 | CEP104   | 11.91  | 24.16  | 2.03  | 0.003424 | 0.027949 |
| ENSOARG00000021013 | CGN      | 44.44  | 21.26  | -2.09 | 0.003085 | 0.027949 |
| ENSOARG00000017918 | COMT     | 260.23 | 119.25 | -2.18 | 0.00343  | 0.027949 |
| ENSOARG00000017879 | CUX2     | 10.23  | 2.43   | -4.21 | 0.00331  | 0.027949 |
| ENSOARG00000003499 | DNAJB9   | 60.28  | 156.89 | 2.6   | 0.002975 | 0.027949 |
| ENSOARG00000020153 | DTX3L    | 18.61  | 8.71   | -2.14 | 0.003103 | 0.027949 |
| ENSOARG00000012836 | EBF1     | 0.68   | 6.06   | 8.91  | 0.003402 | 0.027949 |
| ENSOARG00000018379 | EFEMP2   | 70.7   | 32.69  | -2.16 | 0.003053 | 0.027949 |
| ENSOARG00000013753 | EGFR     | 43.87  | 130.17 | 2.97  | 0.003246 | 0.027949 |
| ENSOARG00000016422 | EVI5     | 12.95  | 20.86  | 1.61  | 0.003346 | 0.027949 |
| ENSOARG00000002034 | FLCN     | 19.18  | 36.38  | 1.9   | 0.003422 | 0.027949 |
| ENSOARG00000010386 | FOXA3    | 79.28  | 33.91  | -2.34 | 0.003428 | 0.027949 |
| ENSOARG00000019759 | GMCL1    | 9.59   | 20.63  | 2.15  | 0.003436 | 0.027949 |
| ENSOARG00000019160 | GMPR2    | 47.59  | 21.35  | -2.23 | 0.003074 | 0.027949 |
| ENSOARG00000011517 | GTF2IRD1 | 5.54   | 16.89  | 3.05  | 0.003042 | 0.027949 |
| ENSOARG00000020306 | GYS2     | 43.1   | 16.74  | -2.57 | 0.003097 | 0.027949 |
| ENSOARG00000016250 | HSPA13   | 58.79  | 95.64  | 1.63  | 0.003279 | 0.027949 |
| ENSOARG00000018980 | IDH1     | 51.41  | 19.1   | -2.69 | 0.003226 | 0.027949 |
| ENSOARG00000013188 | IFNAR1   | 68.03  | 27.94  | -2.43 | 0.003367 | 0.027949 |
| ENSOARG00000013309 | IFNAR2   | 44.89  | 20.27  | -2.21 | 0.003289 | 0.027949 |
| ENSOARG00000004632 | IGF2R    | 208.08 | 109.04 | -1.91 | 0.003361 | 0.027949 |
| ENSOARG00000002831 | IMPDH1   | 16.08  | 8.8    | -1.83 | 0.003196 | 0.027949 |
| ENSOARG00000018132 | ING3     | 11.7   | 19.46  | 1.66  | 0.003243 | 0.027949 |
| ENSOARG00000010172 | INTS12   | 16.43  | 27.19  | 1.65  | 0.003137 | 0.027949 |
| ENSOARG00000020445 | KCMF1    | 35.49  | 96.81  | 2.73  | 0.00342  | 0.027949 |
| ENSOARG00000020664 | KDM3A    | 17.5   | 33.59  | 1.92  | 0.003059 | 0.027949 |
| ENSOARG00000012538 | KDM7A    | 3.91   | 11.17  | 2.86  | 0.00342  | 0.027949 |
| ENSOARG00000005247 | KIAA0040 | 22.53  | 7.51   | -3    | 0.003291 | 0.027949 |
| ENSOARG00000002785 | KIAA1217 | 34.12  | 22.27  | -1.53 | 0.003444 | 0.027949 |
| ENSOARG00000003774 | KMT5A    | 26.54  | 54.23  | 2.04  | 0.00333  | 0.027949 |
| ENSOARG00000003331 | LUC7L3   | 52.58  | 23.67  | -2.22 | 0.003296 | 0.027949 |
| ENSOARG00000019101 | MAP2     | 5.91   | 12.7   | 2.15  | 0.003324 | 0.027949 |
| ENSOARG00000016128 | MAP3K2   | 8.48   | 13.76  | 1.62  | 0.003317 | 0.027949 |
| ENSOARG00000020516 | MAT2A    | 40.39  | 22.87  | -1.77 | 0.003152 | 0.027949 |
| ENSOARG00000005136 | MSH2     | 15.69  | 8.13   | -1.93 | 0.003366 | 0.027949 |
| ENSOARG00000002045 | NR3C1    | 29.97  | 49.55  | 1.65  | 0.003147 | 0.027949 |
| ENSOARG00000017705 | NT5C3B   | 16.05  | 8.02   | -2    | 0.003227 | 0.027949 |

|                    |          |        |        |       |          |          |
|--------------------|----------|--------|--------|-------|----------|----------|
| ENSOARG00000012298 | PAN3     | 10.76  | 17.93  | 1.67  | 0.003122 | 0.027949 |
| ENSOARG00000012704 | PCBP3    | 6.67   | 12.58  | 1.89  | 0.003298 | 0.027949 |
| ENSOARG00000015620 | PDZD11   | 51.88  | 34.61  | -1.5  | 0.003401 | 0.027949 |
| ENSOARG00000006530 | PEX12    | 11.62  | 5.94   | -1.96 | 0.003242 | 0.027949 |
| ENSOARG00000017889 | PHKA1    | 5.99   | 18     | 3.01  | 0.003042 | 0.027949 |
| ENSOARG00000005127 | PIGC     | 87.49  | 167.92 | 1.92  | 0.003251 | 0.027949 |
| ENSOARG00000005981 | PIGN     | 14.06  | 5.89   | -2.39 | 0.003116 | 0.027949 |
| ENSOARG00000014522 | PLAA     | 26.22  | 45.27  | 1.73  | 0.003313 | 0.027949 |
| ENSOARG00000019192 | PLCXD2   | 5      | 11.79  | 2.36  | 0.003235 | 0.027949 |
| ENSOARG00000002382 | POMT2    | 24.87  | 40.04  | 1.61  | 0.00328  | 0.027949 |
| ENSOARG00000012344 | PPP1R15A | 53.39  | 248.82 | 4.66  | 0.003442 | 0.027949 |
| ENSOARG00000013460 | RAB33B   | 25.23  | 43.81  | 1.74  | 0.003366 | 0.027949 |
| ENSOARG00000013632 | RB1CC1   | 43.72  | 79.44  | 1.82  | 0.003294 | 0.027949 |
| ENSOARG00000006567 | RMI2     | 15.38  | 3.21   | -4.79 | 0.003253 | 0.027949 |
| ENSOARG00000016739 | ROBO1    | 20.46  | 12.41  | -1.65 | 0.003091 | 0.027949 |
| ENSOARG00000012003 | RUSC2    | 6.29   | 12.24  | 1.95  | 0.0033   | 0.027949 |
| ENSOARG00000005530 | SHISAL2A | 16.61  | 3.64   | -4.56 | 0.002986 | 0.027949 |
| ENSOARG00000011235 | SIK1B    | 11.87  | 39.91  | 3.36  | 0.003107 | 0.027949 |
| ENSOARG00000003327 | SIPA1L2  | 11.98  | 20.28  | 1.69  | 0.003404 | 0.027949 |
| ENSOARG00000012230 | SLC6A11  | 29.58  | 16.25  | -1.82 | 0.003408 | 0.027949 |
| ENSOARG00000006314 | SPRY3    | 44.44  | 7.83   | -5.68 | 0.003254 | 0.027949 |
| ENSOARG00000008779 | SPRYD4   | 33.51  | 18.33  | -1.83 | 0.003053 | 0.027949 |
| ENSOARG00000017186 | TENT4B   | 13.52  | 24.58  | 1.82  | 0.003074 | 0.027949 |
| ENSOARG00000015940 | TMCC3    | 15.66  | 31.9   | 2.04  | 0.003429 | 0.027949 |
| ENSOARG00000010253 | TMEM25   | 10.18  | 2.62   | -3.89 | 0.003108 | 0.027949 |
| ENSOARG00000012798 | TMEM41B  | 24.04  | 46.83  | 1.95  | 0.003304 | 0.027949 |
| ENSOARG00000013279 | TRIO     | 21.02  | 53.84  | 2.56  | 0.003029 | 0.027949 |
| ENSOARG00000006584 | UGCG     | 12.98  | 47.64  | 3.67  | 0.003129 | 0.027949 |
| ENSOARG00000014589 | ZFC3H1   | 12.53  | 6.14   | -2.04 | 0.002989 | 0.027949 |
| ENSOARG00000000964 | ZNF358   | 56.56  | 99.16  | 1.75  | 0.003308 | 0.027949 |
| ENSOARG00000001314 | ZNF628   | 7.44   | 33.34  | 4.48  | 0.003278 | 0.027949 |
| ENSOARG00000012676 | ZNF70    | 5.84   | 12.08  | 2.07  | 0.003003 | 0.027949 |
| ENSOARG00000007797 | ARRB2    | 15.6   | 7.24   | -2.15 | 0.003482 | 0.02796  |
| ENSOARG00000003541 | CLK3     | 33.08  | 55.72  | 1.68  | 0.003474 | 0.02796  |
| ENSOARG00000002452 | SYNRG    | 18.43  | 10.68  | -1.73 | 0.003477 | 0.02796  |
| ENSOARG00000008633 | YTHDC1   | 39.82  | 59.72  | 1.5   | 0.003462 | 0.02796  |
| ENSOARG00000004487 | YWHAB    | 129.88 | 82.85  | -1.57 | 0.003467 | 0.02796  |
| ENSOARG00000010246 | ATP11C   | 11.5   | 5.99   | -1.92 | 0.003528 | 0.027972 |
| ENSOARG00000017028 | DEPDC7   | 22.31  | 9.99   | -2.23 | 0.003517 | 0.027972 |
| ENSOARG00000012437 | DHDH     | 7.95   | 17.12  | 2.15  | 0.003526 | 0.027972 |
| ENSOARG00000017328 | F3       | 32.41  | 85.18  | 2.63  | 0.003492 | 0.027972 |
| ENSOARG00000020079 | GPR176   | 7.21   | 1.38   | -5.22 | 0.003508 | 0.027972 |
| ENSOARG00000010087 | STAP2    | 49.23  | 28.59  | -1.72 | 0.003503 | 0.027972 |

|                    |              |        |         |       |          |          |
|--------------------|--------------|--------|---------|-------|----------|----------|
| ENSOARG00000018098 | TBCEL        | 23.93  | 12.89   | -1.86 | 0.003529 | 0.027972 |
| ENSOARG00000015023 | LOC101106976 | 27.01  | 2.7     | -10   | 0.00356  | 0.028078 |
| ENSOARG00000020552 | TRA2B        | 155.6  | 101.95  | -1.53 | 0.003549 | 0.028078 |
| ENSOARG00000015223 | SLC16A12     | 14.14  | 1.67    | -8.47 | 0.00357  | 0.028117 |
| ENSOARG00000010291 | DMWD         | 16.1   | 31.41   | 1.95  | 0.003583 | 0.028153 |
| ENSOARG00000009545 | RELB         | 24.5   | 59.85   | 2.44  | 0.003586 | 0.028153 |
| ENSOARG00000017814 | ARL5B        | 11.95  | 30.74   | 2.57  | 0.003708 | 0.028175 |
| ENSOARG00000007094 | ASCC1        | 19.45  | 29.41   | 1.51  | 0.003655 | 0.028175 |
| ENSOARG00000016386 | ATG4D        | 20.82  | 47.27   | 2.27  | 0.003705 | 0.028175 |
| ENSOARG00000020487 | BCL6         | 38.54  | 70.23   | 1.82  | 0.003717 | 0.028175 |
| ENSOARG00000020542 | CDC20        | 10.09  | 3.02    | -3.34 | 0.0036   | 0.028175 |
| ENSOARG00000005878 | CIDEC        | 3.11   | 8.68    | 2.79  | 0.003686 | 0.028175 |
| ENSOARG00000005709 | COBLL1       | 75.71  | 149.28  | 1.97  | 0.003659 | 0.028175 |
| ENSOARG00000006454 | DPP4         | 22.47  | 12.62   | -1.78 | 0.003707 | 0.028175 |
| ENSOARG00000007427 | EPSTI1       | 32.66  | 11.05   | -2.96 | 0.003715 | 0.028175 |
| ENSOARG00000018441 | FAM210B      | 74.54  | 49.39   | -1.51 | 0.0037   | 0.028175 |
| ENSOARG00000004059 | G6PC         | 11.58  | 1.78    | -6.51 | 0.003727 | 0.028175 |
| ENSOARG00000008756 | H6PD         | 127.32 | 63.76   | -2    | 0.003725 | 0.028175 |
| ENSOARG00000005036 | KHDRBS3      | 22.53  | 52.9    | 2.35  | 0.003642 | 0.028175 |
| ENSOARG00000020833 | MYO1E        | 28.78  | 57.75   | 2.01  | 0.003725 | 0.028175 |
| ENSOARG00000020863 | MYZAP        | 38.32  | 68.9    | 1.8   | 0.003694 | 0.028175 |
| ENSOARG00000020769 | PLEKHO1      | 77.12  | 230.74  | 2.99  | 0.003699 | 0.028175 |
| ENSOARG00000008880 | SH2D5        | 3.29   | 23.46   | 7.13  | 0.003735 | 0.028175 |
| ENSOARG00000002485 | SSNA1        | 111.62 | 74.52   | -1.5  | 0.003615 | 0.028175 |
| ENSOARG00000009026 | TMEM215      | 11.97  | 74.19   | 6.2   | 0.003598 | 0.028175 |
| ENSOARG00000008882 | TNKS1BP1     | 53.46  | 32.22   | -1.66 | 0.00367  | 0.028175 |
| ENSOARG00000019099 | TRIM34       | 8.37   | 2.05    | -4.08 | 0.003721 | 0.028175 |
| ENSOARG00000012931 | UBE2D1       | 25.58  | 53.51   | 2.09  | 0.003643 | 0.028175 |
| ENSOARG00000021177 | ZFP36L1      | 364.15 | 938.7   | 2.58  | 0.003725 | 0.028175 |
| ENSOARG00000008207 | SETD1A       | 11.33  | 18.66   | 1.65  | 0.003741 | 0.028177 |
| ENSOARG00000009524 | DNAJC16      | 13.25  | 20.01   | 1.51  | 0.003759 | 0.028207 |
| ENSOARG00000004178 | GTF2I        | 34.11  | 14.17   | -2.41 | 0.003754 | 0.028207 |
| ENSOARG00000002815 | PACS1        | 38.92  | 58.68   | 1.51  | 0.003759 | 0.028207 |
| ENSOARG00000014942 | MMAB         | 19.43  | 10.33   | -1.88 | 0.00377  | 0.028257 |
| ENSOARG00000020101 | EIF2AK4      | 15.01  | 7.36    | -2.04 | 0.003794 | 0.028398 |
| ENSOARG00000011159 | CLIP1        | 50.96  | 100.51  | 1.97  | 0.003799 | 0.0284   |
| ENSOARG00000010704 | ADRA2A       | 7.94   | 1.22    | -6.51 | 0.003818 | 0.028486 |
| ENSOARG00000018810 | CEP120       | 16.45  | 30.07   | 1.83  | 0.003819 | 0.028486 |
| ENSOARG00000004938 | COG4         | 20.13  | 8.93    | -2.25 | 0.00384  | 0.028516 |
| ENSOARG00000010839 | MPP6         | 7.68   | 14.57   | 1.9   | 0.003845 | 0.028516 |
| ENSOARG00000002683 | SQSTM1       | 732.11 | 1759.16 | 2.4   | 0.003846 | 0.028516 |
| ENSOARG00000012095 | STAMBP       | 13.32  | 52.87   | 3.97  | 0.00383  | 0.028516 |
| ENSOARG00000003340 | ZFP91        | 33.97  | 58.86   | 1.73  | 0.003837 | 0.028516 |



|                    |          |        |        |       |          |          |
|--------------------|----------|--------|--------|-------|----------|----------|
| ENSOARG00000014591 | AZI2     | 38.46  | 60.74  | 1.58  | 0.003873 | 0.028543 |
| ENSOARG00000019210 | CPS1     | 126.85 | 25.09  | -5.06 | 0.003897 | 0.028543 |
| ENSOARG00000020267 | GCHFR    | 58.41  | 36.49  | -1.6  | 0.00391  | 0.028543 |
| ENSOARG00000009630 | MLLT6    | 18.57  | 12.37  | -1.5  | 0.003894 | 0.028543 |
| ENSOARG00000004500 | NAMPT    | 23.93  | 52.38  | 2.19  | 0.003864 | 0.028543 |
| ENSOARG00000012715 | PTGIS    | 17.16  | 9.24   | -1.86 | 0.003907 | 0.028543 |
| ENSOARG00000017883 | RBM38    | 26.97  | 43.07  | 1.6   | 0.00388  | 0.028543 |
| ENSOARG00000001822 | SFXN2    | 9.06   | 3.41   | -2.66 | 0.003897 | 0.028543 |
| ENSOARG00000007620 | SLC25A30 | 39.04  | 89.41  | 2.29  | 0.003878 | 0.028543 |
| ENSOARG00000003229 | TRAK1    | 24.45  | 50.8   | 2.08  | 0.003884 | 0.028543 |
| ENSOARG00000015280 | ANKRD28  | 27.59  | 46.87  | 1.7   | 0.003947 | 0.028554 |
| ENSOARG00000005606 | C18orf21 | 19.92  | 31.25  | 1.57  | 0.003942 | 0.028554 |
| ENSOARG00000012570 | C8orf33  | 25.78  | 10.73  | -2.4  | 0.003946 | 0.028554 |
| ENSOARG00000010972 | CCDC9    | 15.6   | 43.12  | 2.76  | 0.003933 | 0.028554 |
| ENSOARG00000017521 | HBEGF    | 6.42   | 14.19  | 2.21  | 0.003923 | 0.028554 |
| ENSOARG00000020454 | P3H1     | 41.05  | 24.74  | -1.66 | 0.003949 | 0.028554 |
| ENSOARG00000020405 | WDFY1    | 30.69  | 54.38  | 1.77  | 0.003922 | 0.028554 |
| ENSOARG00000010666 | AKAP13   | 15.19  | 27.43  | 1.81  | 0.004005 | 0.028572 |
| ENSOARG00000013614 | ANTKMT   | 15.57  | 5.4    | -2.88 | 0.003996 | 0.028572 |
| ENSOARG00000015162 | BTBD9    | 31.58  | 15.7   | -2.01 | 0.004004 | 0.028572 |
| ENSOARG00000005302 | DBN1     | 35.35  | 20.41  | -1.73 | 0.003961 | 0.028572 |
| ENSOARG00000000793 | DPH7     | 29.79  | 18.21  | -1.64 | 0.004022 | 0.028572 |
| ENSOARG00000004822 | FBXO21   | 25.08  | 15.05  | -1.67 | 0.003978 | 0.028572 |
| ENSOARG00000001834 | FLVCR2   | 18.33  | 29.58  | 1.61  | 0.004029 | 0.028572 |
| ENSOARG00000005547 | GTF3C5   | 18.45  | 9.84   | -1.88 | 0.004019 | 0.028572 |
| ENSOARG00000000725 | MAP3K20  | 18.69  | 11.71  | -1.6  | 0.003976 | 0.028572 |
| ENSOARG00000021198 | PCNX1    | 27.95  | 55.56  | 1.99  | 0.00399  | 0.028572 |
| ENSOARG00000004132 | PIM1     | 5.65   | 28.88  | 5.11  | 0.003997 | 0.028572 |
| ENSOARG00000016943 | SESTD1   | 55.22  | 124.66 | 2.26  | 0.003996 | 0.028572 |
| ENSOARG00000019446 | TNS1     | 40.02  | 82.81  | 2.07  | 0.003999 | 0.028572 |
| ENSOARG00000007592 | PTGS2    | 41.34  | 106.39 | 2.57  | 0.004048 | 0.028639 |
| ENSOARG00000008283 | F11      | 9.28   | 1.97   | -4.71 | 0.004075 | 0.028688 |
| ENSOARG00000019342 | HOMEZ    | 25.66  | 13.29  | -1.93 | 0.004069 | 0.028688 |
| ENSOARG00000019300 | PFKM     | 14.99  | 9.1    | -1.65 | 0.00406  | 0.028688 |
| ENSOARG00000012621 | SLCO4A1  | 9.62   | 15.42  | 1.6   | 0.004083 | 0.028688 |
| ENSOARG00000016264 | VPS37C   | 27.58  | 60.4   | 2.19  | 0.004081 | 0.028688 |
| ENSOARG00000016793 | GGH      | 53.55  | 29.3   | -1.83 | 0.00409  | 0.028695 |
| ENSOARG00000008755 | HEMK1    | 15.17  | 9.4    | -1.61 | 0.004128 | 0.028777 |
| ENSOARG00000020673 | ITM2C    | 232.27 | 145.32 | -1.6  | 0.004111 | 0.028777 |
| ENSOARG00000018123 | SARM1    | 16.42  | 7.16   | -2.29 | 0.004119 | 0.028777 |
| ENSOARG00000017174 | SLAIN2   | 25.63  | 55.84  | 2.18  | 0.004158 | 0.028951 |
| ENSOARG00000009561 | -        | 43.54  | 28.39  | -1.53 | 0.004184 | 0.029102 |
| ENSOARG00000002894 | RTN4     | 41.13  | 104.06 | 2.53  | 0.004196 | 0.029121 |

|                    |          |        |         |       |          |          |
|--------------------|----------|--------|---------|-------|----------|----------|
| ENSOARG00000020627 | SOS2     | 8.81   | 15.83   | 1.8   | 0.004198 | 0.029121 |
| ENSOARG00000015526 | ACHE     | 2.84   | 8.01    | 2.82  | 0.004236 | 0.029165 |
| ENSOARG00000007717 | GIN51    | 13.73  | 5.06    | -2.71 | 0.00422  | 0.029165 |
| ENSOARG00000017581 | KDM6B    | 25.06  | 54.47   | 2.17  | 0.004233 | 0.029165 |
| ENSOARG00000008180 | PTPRS    | 12.65  | 5.91    | -2.14 | 0.004218 | 0.029165 |
| ENSOARG00000017557 | SPECC1   | 20.94  | 53.41   | 2.55  | 0.004259 | 0.029294 |
| ENSOARG00000015988 | FGD6     | 14.86  | 24.13   | 1.62  | 0.004278 | 0.029355 |
| ENSOARG00000014515 | MEX3B    | 5.04   | 12.46   | 2.47  | 0.004274 | 0.029355 |
| ENSOARG00000001644 | EXT2     | 81.01  | 40.9    | -1.98 | 0.004317 | 0.029453 |
| ENSOARG00000015083 | GSTA4    | 7.72   | 2.12    | -3.64 | 0.004321 | 0.029453 |
| ENSOARG00000005734 | LMAN1    | 63.51  | 34.33   | -1.85 | 0.004308 | 0.029453 |
| ENSOARG00000008557 | RITA1    | 31.67  | 56.22   | 1.78  | 0.004314 | 0.029453 |
| ENSOARG00000013428 | ZNF555   | 2.66   | 8.11    | 3.05  | 0.004308 | 0.029453 |
| ENSOARG00000018048 | KCND2    | 2.49   | 7.82    | 3.14  | 0.004338 | 0.029538 |
| ENSOARG00000006322 | LIF      | 7.7    | 39.13   | 5.08  | 0.004348 | 0.029545 |
| ENSOARG00000004268 | TARDBP   | 13.46  | 7.49    | -1.8  | 0.004346 | 0.029545 |
| ENSOARG00000008460 | BRF1     | 11.67  | 18.69   | 1.6   | 0.004371 | 0.029568 |
| ENSOARG00000000464 | IL20RA   | 19.91  | 2.63    | -7.57 | 0.004371 | 0.029568 |
| ENSOARG00000018257 | TRIM3    | 11.84  | 33.33   | 2.82  | 0.004366 | 0.029568 |
| ENSOARG00000007500 | TCEA3    | 39.24  | 10.25   | -3.83 | 0.00438  | 0.029596 |
| ENSOARG00000003535 | ERICH5   | 25.15  | 5.24    | -4.8  | 0.004396 | 0.029643 |
| ENSOARG00000011910 | LIMK1    | 18.43  | 37.26   | 2.02  | 0.004409 | 0.029695 |
| ENSOARG00000012473 | RAP2C    | 95.41  | 61.02   | -1.56 | 0.004426 | 0.029776 |
| ENSOARG00000010560 | F9       | 57.07  | 27.12   | -2.1  | 0.004443 | 0.029861 |
| ENSOARG00000003144 | SPAG9    | 34.09  | 88.56   | 2.6   | 0.004448 | 0.029862 |
| ENSOARG00000013887 | NFIB     | 17.27  | 7.32    | -2.36 | 0.004454 | 0.029866 |
| ENSOARG00000005479 | ARGLU1   | 105.63 | 56.17   | -1.88 | 0.004476 | 0.02987  |
| ENSOARG00000004591 | HIRIP3   | 19.18  | 12.27   | -1.56 | 0.004482 | 0.02987  |
| ENSOARG00000008537 | NAV2     | 8.55   | 13.65   | 1.6   | 0.004466 | 0.02987  |
| ENSOARG00000010083 | SLC25A37 | 38.5   | 59.22   | 1.54  | 0.004476 | 0.02987  |
| ENSOARG00000018948 | UBE2F    | 28.37  | 52.59   | 1.85  | 0.004483 | 0.02987  |
| ENSOARG00000000870 | -        | 512.33 | 1021.19 | 1.99  | 0.004512 | 0.029917 |
| ENSOARG00000000369 | ECHS1    | 129.04 | 72.44   | -1.78 | 0.004502 | 0.029917 |
| ENSOARG00000007524 | PLEKHN1  | 9.25   | 36.34   | 3.93  | 0.004505 | 0.029917 |
| ENSOARG00000025635 | -        | 112.61 | 194.43  | 1.73  | 0.004544 | 0.030063 |
| ENSOARG00000006271 | ALAD     | 84.75  | 32.57   | -2.6  | 0.004551 | 0.030063 |
| ENSOARG00000013683 | LMNB2    | 28.87  | 18.59   | -1.55 | 0.004548 | 0.030063 |
| ENSOARG00000003979 | RABEP1   | 46.74  | 83.06   | 1.78  | 0.004566 | 0.030092 |
| ENSOARG00000005377 | DUSP8    | 20.86  | 66.15   | 3.17  | 0.004575 | 0.030092 |
| ENSOARG00000009716 | EXOC3L2  | 11.88  | 5.54    | -2.14 | 0.004583 | 0.030113 |
| ENSOARG00000002278 | MAGEF1   | 11.93  | 3.93    | -3.04 | 0.004588 | 0.030116 |
| ENSOARG00000020773 | CA14     | 12.27  | 2.11    | -5.82 | 0.004647 | 0.030132 |
| ENSOARG00000019089 | DHX9     | 34.02  | 19.35   | -1.76 | 0.004637 | 0.030132 |

|                    |              |        |        |       |          |          |
|--------------------|--------------|--------|--------|-------|----------|----------|
| ENSOARG00000009426 | FRK          | 7.77   | 38.53  | 4.96  | 0.00461  | 0.030132 |
| ENSOARG00000020674 | FXR1         | 25.01  | 40.3   | 1.61  | 0.004649 | 0.030132 |
| ENSOARG00000017278 | JMY          | 12.09  | 53.13  | 4.39  | 0.004642 | 0.030132 |
| ENSOARG00000016210 | NAB1         | 21.02  | 34.89  | 1.66  | 0.0046   | 0.030132 |
| ENSOARG00000014538 | SLC25A45     | 15.05  | 2.13   | -7.07 | 0.004624 | 0.030132 |
| ENSOARG00000013015 | TAMM41       | 12.86  | 6.2    | -2.07 | 0.004638 | 0.030132 |
| ENSOARG00000020962 | TMOD2        | 11.86  | 29.24  | 2.47  | 0.004629 | 0.030132 |
| ENSOARG00000009215 | WDR46        | 27.65  | 16.41  | -1.68 | 0.004625 | 0.030132 |
| ENSOARG00000010448 | ERBB3        | 96.44  | 36.83  | -2.62 | 0.004658 | 0.030157 |
| ENSOARG00000020045 | -            | 14.77  | 8.1    | -1.82 | 0.004694 | 0.030222 |
| ENSOARG00000003314 | POLB         | 9.07   | 14.41  | 1.59  | 0.00468  | 0.030222 |
| ENSOARG00000004074 | RIN1         | 10.45  | 4.04   | -2.59 | 0.004702 | 0.030222 |
| ENSOARG00000013779 | SOX9         | 13.56  | 33.23  | 2.45  | 0.004682 | 0.030222 |
| ENSOARG00000007547 | LOC101110151 | 78.78  | 184.62 | 2.34  | 0.004713 | 0.030251 |
| ENSOARG00000016549 | LONRF3       | 6.47   | 48.3   | 7.47  | 0.004721 | 0.030251 |
| ENSOARG00000015995 | POLR2D       | 26.42  | 15.46  | -1.71 | 0.004718 | 0.030251 |
| ENSOARG00000012001 | MLXIP        | 20.4   | 32.13  | 1.57  | 0.004732 | 0.030255 |
| ENSOARG00000009476 | DLG5         | 45.73  | 73.62  | 1.61  | 0.00475  | 0.030292 |
| ENSOARG00000016378 | FEM1C        | 30.63  | 131.13 | 4.28  | 0.004744 | 0.030292 |
| ENSOARG00000009330 | LYPD6        | 5.2    | 14.68  | 2.82  | 0.004757 | 0.030292 |
| ENSOARG00000002807 | MED20        | 14.67  | 9.17   | -1.6  | 0.004753 | 0.030292 |
| ENSOARG00000011438 | KANSL1       | 26.64  | 68.1   | 2.56  | 0.004764 | 0.030301 |
| ENSOARG00000016052 | AOX1         | 49.21  | 13.66  | -3.6  | 0.004778 | 0.030331 |
| ENSOARG00000005539 | MEST         | 19.41  | 7.01   | -2.77 | 0.004775 | 0.030331 |
| ENSOARG00000002586 | APOA1        | 859.76 | 419.78 | -2.05 | 0.004807 | 0.030414 |
| ENSOARG00000017009 | CENPV        | 12.91  | 7.18   | -1.8  | 0.004824 | 0.030414 |
| ENSOARG00000010306 | PPP3CC       | 17.92  | 32.51  | 1.81  | 0.004826 | 0.030414 |
| ENSOARG00000003971 | SPATA6       | 6.72   | 14.47  | 2.15  | 0.004822 | 0.030414 |
| ENSOARG00000005027 | TMEM209      | 23.42  | 14.28  | -1.64 | 0.004822 | 0.030414 |
| ENSOARG00000020221 | USP34        | 13.87  | 21.17  | 1.53  | 0.004825 | 0.030414 |
| ENSOARG00000009359 | DCAF12       | 94.32  | 194.56 | 2.06  | 0.004844 | 0.030468 |
| ENSOARG00000005321 | PMM2         | 32.51  | 14.43  | -2.25 | 0.00484  | 0.030468 |
| ENSOARG00000003961 | HNRNPM       | 260.46 | 163.53 | -1.59 | 0.00487  | 0.030506 |
| ENSOARG00000019973 | RASSF8       | 22.55  | 87.73  | 3.89  | 0.004867 | 0.030506 |
| ENSOARG00000017352 | SHROOM3      | 12.81  | 39.74  | 3.1   | 0.004864 | 0.030506 |
| ENSOARG00000014392 | SMIM3        | 73.79  | 24.64  | -2.99 | 0.004868 | 0.030506 |
| ENSOARG00000007774 | CYTIP        | 4.76   | 10.65  | 2.24  | 0.004896 | 0.030606 |
| ENSOARG00000013724 | PEX26        | 10.36  | 5.01   | -2.07 | 0.004908 | 0.030623 |
| ENSOARG00000009401 | PTGER4       | 8.73   | 17.13  | 1.96  | 0.004908 | 0.030623 |
| ENSOARG00000026818 | -            | 10.73  | 4.33   | -2.48 | 0.005041 | 0.030694 |
| ENSOARG00000013118 | ACADS        | 60.1   | 29.25  | -2.05 | 0.004951 | 0.030694 |
| ENSOARG00000009599 | ALDH1A3      | 7.71   | 23.6   | 3.06  | 0.005041 | 0.030694 |
| ENSOARG00000000371 | BEX2         | 150.41 | 81.88  | -1.84 | 0.005066 | 0.030694 |

|                    |         |         |         |       |          |          |
|--------------------|---------|---------|---------|-------|----------|----------|
| ENSOARG00000021069 | BMP4    | 13.39   | 4.92    | -2.72 | 0.004973 | 0.030694 |
| ENSOARG00000007763 | ETV1    | 21.63   | 14.45   | -1.5  | 0.005052 | 0.030694 |
| ENSOARG00000003213 | FAM241A | 66.39   | 37.2    | -1.78 | 0.005008 | 0.030694 |
| ENSOARG00000008304 | GYG2    | 16.48   | 9.92    | -1.66 | 0.005025 | 0.030694 |
| ENSOARG00000004840 | HERC4   | 13.86   | 25.15   | 1.81  | 0.005093 | 0.030694 |
| ENSOARG00000014425 | MERTK   | 22.22   | 34.5    | 1.55  | 0.005072 | 0.030694 |
| ENSOARG00000011743 | MPEG1   | 161.47  | 106.52  | -1.52 | 0.005075 | 0.030694 |
| ENSOARG00000020025 | PELI1   | 28.98   | 147.05  | 5.07  | 0.00504  | 0.030694 |
| ENSOARG00000016828 | PLVAP   | 58.77   | 26.27   | -2.24 | 0.005011 | 0.030694 |
| ENSOARG00000006659 | PTGR1   | 125.95  | 50.52   | -2.49 | 0.005064 | 0.030694 |
| ENSOARG00000000924 | RBM7    | 14.05   | 28.89   | 2.06  | 0.005057 | 0.030694 |
| ENSOARG00000001570 | RCN2    | 26      | 43.92   | 1.69  | 0.005093 | 0.030694 |
| ENSOARG00000019612 | SALL2   | 15.38   | 1.8     | -8.54 | 0.005051 | 0.030694 |
| ENSOARG00000008681 | SPSB1   | 58.9    | 195.41  | 3.32  | 0.004982 | 0.030694 |
| ENSOARG00000019012 | SRXN1   | 67.6    | 132.07  | 1.95  | 0.004953 | 0.030694 |
| ENSOARG00000008357 | STAM2   | 24.88   | 39.86   | 1.6   | 0.00506  | 0.030694 |
| ENSOARG00000002155 | TAF1D   | 32.35   | 53.25   | 1.65  | 0.005066 | 0.030694 |
| ENSOARG00000014625 | TMEM19  | 18.62   | 11.31   | -1.65 | 0.005049 | 0.030694 |
| ENSOARG00000019713 | TMEM37  | 10.44   | 3.96    | -2.64 | 0.005052 | 0.030694 |
| ENSOARG00000016843 | TTPA    | 28.21   | 10.6    | -2.66 | 0.005093 | 0.030694 |
| ENSOARG00000020396 | XXYLT1  | 17.07   | 8.52    | -2    | 0.004957 | 0.030694 |
| ENSOARG00000020655 | B3GNT5  | 7.87    | 20.23   | 2.57  | 0.005115 | 0.030749 |
| ENSOARG00000020150 | PARP9   | 17.77   | 9.33    | -1.9  | 0.005117 | 0.030749 |
| ENSOARG00000004276 | SNX9    | 51.82   | 99.83   | 1.93  | 0.005138 | 0.030816 |
| ENSOARG00000010643 | TIMD4   | 20.84   | 10.25   | -2.03 | 0.005137 | 0.030816 |
| ENSOARG00000018223 | ATXN2   | 34.77   | 52.96   | 1.52  | 0.005151 | 0.03084  |
| ENSOARG00000013993 | LRRCC1  | 8.54    | 19.34   | 2.26  | 0.005167 | 0.03084  |
| ENSOARG00000007640 | PLEKHA6 | 19.81   | 10      | -1.98 | 0.005163 | 0.03084  |
| ENSOARG00000009787 | RNF41   | 30.48   | 75.84   | 2.49  | 0.005171 | 0.03084  |
| ENSOARG00000018615 | SAMD9   | 9.47    | 3.67    | -2.58 | 0.005161 | 0.03084  |
| ENSOARG00000019806 | PLXNB2  | 51.98   | 31.93   | -1.63 | 0.005181 | 0.030862 |
| ENSOARG00000004351 | KRT18   | 175.39  | 48.61   | -3.61 | 0.005194 | 0.030902 |
| ENSOARG00000017717 | SPG21   | 34.04   | 66.77   | 1.96  | 0.005198 | 0.030902 |
| ENSOARG00000018391 | GRAP    | 12.55   | 7.32    | -1.71 | 0.005207 | 0.030927 |
| ENSOARG00000005090 | -       | 127.22  | 83.56   | -1.52 | 0.005398 | 0.030935 |
| ENSOARG00000018454 | ABTB2   | 27.84   | 69.05   | 2.48  | 0.005225 | 0.030935 |
| ENSOARG00000015385 | AGTR1   | 151.8   | 60.1    | -2.53 | 0.005218 | 0.030935 |
| ENSOARG00000008188 | ANXA6   | 202.61  | 96.27   | -2.1  | 0.00545  | 0.030935 |
| ENSOARG00000013479 | CDK16   | 65.02   | 39.12   | -1.66 | 0.005508 | 0.030935 |
| ENSOARG00000013829 | CHUK    | 10.03   | 16.07   | 1.6   | 0.00535  | 0.030935 |
| ENSOARG00000006198 | CPT2    | 51.26   | 23.18   | -2.21 | 0.005418 | 0.030935 |
| ENSOARG00000015263 | CTSB    | 1025.35 | 2842.15 | 2.77  | 0.005371 | 0.030935 |
| ENSOARG00000014744 | DHRS3   | 48.91   | 14.47   | -3.38 | 0.005403 | 0.030935 |

|                    |           |        |        |       |          |          |
|--------------------|-----------|--------|--------|-------|----------|----------|
| ENSOARG00000007114 | ELOVL7    | 8.18   | 13.94  | 1.7   | 0.005519 | 0.030935 |
| ENSOARG00000017807 | ERAP1     | 25.18  | 9.52   | -2.64 | 0.005423 | 0.030935 |
| ENSOARG00000011152 | FAM221A   | 3.51   | 14.37  | 4.09  | 0.005493 | 0.030935 |
| ENSOARG00000014847 | FBXL21P   | 6.78   | 17.67  | 2.61  | 0.005311 | 0.030935 |
| ENSOARG00000016414 | FOXK2     | 36.83  | 67.48  | 1.83  | 0.005457 | 0.030935 |
| ENSOARG00000007061 | FXYD6     | 68.62  | 41.53  | -1.65 | 0.005435 | 0.030935 |
| ENSOARG00000020262 | H2AJ      | 129.25 | 81.85  | -1.58 | 0.005444 | 0.030935 |
| ENSOARG00000011472 | HNRNPDL   | 77.44  | 121.31 | 1.57  | 0.005313 | 0.030935 |
| ENSOARG00000000414 | HYI       | 27.74  | 6.74   | -4.12 | 0.005426 | 0.030935 |
| ENSOARG00000006609 | INSIG1    | 37.18  | 115.7  | 3.11  | 0.005387 | 0.030935 |
| ENSOARG00000004429 | IVNS1ABP  | 68.72  | 671.85 | 9.78  | 0.005354 | 0.030935 |
| ENSOARG00000019122 | KLF2      | 36.37  | 24.31  | -1.5  | 0.005398 | 0.030935 |
| ENSOARG00000015347 | KPNA2     | 90.96  | 58.5   | -1.55 | 0.005227 | 0.030935 |
| ENSOARG00000003571 | LYST      | 3.59   | 8.92   | 2.48  | 0.005326 | 0.030935 |
| ENSOARG00000012987 | MGST2     | 132.69 | 71.99  | -1.84 | 0.00546  | 0.030935 |
| ENSOARG00000011029 | N4BP2L1   | 79.13  | 43.34  | -1.83 | 0.005495 | 0.030935 |
| ENSOARG00000007371 | NIPSNAP3B | 13.71  | 7.25   | -1.89 | 0.005404 | 0.030935 |
| ENSOARG00000003009 | NT5C2     | 80.34  | 52.46  | -1.53 | 0.005426 | 0.030935 |
| ENSOARG00000017196 | PARD3     | 73.26  | 118.51 | 1.62  | 0.005422 | 0.030935 |
| ENSOARG00000000811 | PARP1     | 63.16  | 37.65  | -1.68 | 0.005395 | 0.030935 |
| ENSOARG00000019206 | PHLDB2    | 55.74  | 144.34 | 2.59  | 0.005524 | 0.030935 |
| ENSOARG00000009984 | PLAC9     | 16.67  | 10.85  | -1.54 | 0.005512 | 0.030935 |
| ENSOARG00000010372 | POLR3D    | 32.83  | 57.22  | 1.74  | 0.005472 | 0.030935 |
| ENSOARG00000005581 | PPARGC1A  | 6.84   | 15.74  | 2.3   | 0.005249 | 0.030935 |
| ENSOARG00000020389 | PPP1R2    | 36.73  | 78.45  | 2.14  | 0.005474 | 0.030935 |
| ENSOARG00000006832 | PRRC2B    | 26.68  | 40.33  | 1.51  | 0.005464 | 0.030935 |
| ENSOARG00000014124 | PTPRE     | 14.12  | 25.11  | 1.78  | 0.005235 | 0.030935 |
| ENSOARG00000005716 | QPRT      | 97.99  | 24.27  | -4.04 | 0.005245 | 0.030935 |
| ENSOARG00000002641 | RBAK      | 6.44   | 18.19  | 2.82  | 0.005514 | 0.030935 |
| ENSOARG00000000341 | RNPEP     | 13.6   | 8.49   | -1.6  | 0.005337 | 0.030935 |
| ENSOARG00000008746 | SAMD8     | 14.67  | 47.74  | 3.25  | 0.005374 | 0.030935 |
| ENSOARG00000002227 | SCHIP1    | 45.56  | 98.34  | 2.16  | 0.005512 | 0.030935 |
| ENSOARG00000014948 | SH3BP2    | 16.05  | 26.73  | 1.67  | 0.005271 | 0.030935 |
| ENSOARG00000013180 | SHROOM1   | 32.95  | 11.43  | -2.88 | 0.005241 | 0.030935 |
| ENSOARG00000009838 | SLC16A11  | 11.17  | 3.18   | -3.51 | 0.005367 | 0.030935 |
| ENSOARG00000008152 | SUGP1     | 19.83  | 11.57  | -1.71 | 0.005475 | 0.030935 |
| ENSOARG00000013648 | UHRF2     | 16.63  | 50.03  | 3.01  | 0.005333 | 0.030935 |
| ENSOARG00000009183 | WBP2      | 193.89 | 293.42 | 1.51  | 0.00531  | 0.030935 |
| ENSOARG00000012355 | WEE1      | 67.5   | 239.88 | 3.55  | 0.005321 | 0.030935 |
| ENSOARG00000008244 | ZBTB17    | 11.79  | 28.96  | 2.46  | 0.005506 | 0.030935 |
| ENSOARG00000011138 | ZDHHC7    | 85.11  | 149.9  | 1.76  | 0.005245 | 0.030935 |
| ENSOARG00000016398 | ZNRD1     | 27.16  | 47.07  | 1.73  | 0.005494 | 0.030935 |
| ENSOARG00000000002 | -         | 28.6   | 54.29  | 1.9   | 0.00566  | 0.030979 |

|                    |         |        |        |       |          |          |
|--------------------|---------|--------|--------|-------|----------|----------|
| ENSOARG00000003405 | -       | 89.02  | 50.17  | -1.77 | 0.005977 | 0.030979 |
| ENSOARG00000009336 | AIMP1   | 10.06  | 15.07  | 1.5   | 0.00581  | 0.030979 |
| ENSOARG00000003568 | AKAP8   | 28.65  | 18.98  | -1.51 | 0.005672 | 0.030979 |
| ENSOARG00000009450 | ANGPTL3 | 134.29 | 36.43  | -3.69 | 0.00585  | 0.030979 |
| ENSOARG00000014563 | ANKS4B  | 80.28  | 24.14  | -3.33 | 0.005582 | 0.030979 |
| ENSOARG00000018958 | ARIH1   | 37.5   | 117.73 | 3.14  | 0.005868 | 0.030979 |
| ENSOARG00000007525 | AXL     | 50.19  | 30.73  | -1.63 | 0.005891 | 0.030979 |
| ENSOARG00000014393 | BACH1   | 43.52  | 66.52  | 1.53  | 0.005551 | 0.030979 |
| ENSOARG00000018738 | BMP2    | 22.39  | 46.45  | 2.07  | 0.005959 | 0.030979 |
| ENSOARG00000015230 | BTB     | 70.16  | 35.73  | -1.96 | 0.005834 | 0.030979 |
| ENSOARG00000002673 | CBFB    | 64.05  | 232.27 | 3.63  | 0.005895 | 0.030979 |
| ENSOARG00000019063 | CBLN3   | 8.93   | 1.7    | -5.25 | 0.005953 | 0.030979 |
| ENSOARG00000015923 | CHDH    | 10.62  | 1.7    | -6.25 | 0.006002 | 0.030979 |
| ENSOARG00000006692 | CLK4    | 14.49  | 29.49  | 2.04  | 0.005896 | 0.030979 |
| ENSOARG00000010462 | CXCR4   | 69.98  | 225.01 | 3.22  | 0.005653 | 0.030979 |
| ENSOARG00000011818 | CYTH2   | 42.96  | 83.4   | 1.94  | 0.005868 | 0.030979 |
| ENSOARG00000000227 | DCAF4   | 11.82  | 17.97  | 1.52  | 0.005848 | 0.030979 |
| ENSOARG00000012189 | DGAT2   | 55.32  | 23.44  | -2.36 | 0.005872 | 0.030979 |
| ENSOARG00000015361 | DPH3    | 31.24  | 49.68  | 1.59  | 0.005589 | 0.030979 |
| ENSOARG00000006334 | DYRK1B  | 12.37  | 23.95  | 1.94  | 0.005857 | 0.030979 |
| ENSOARG00000003363 | FOXN3   | 15.05  | 23.29  | 1.55  | 0.005778 | 0.030979 |
| ENSOARG00000007446 | GSTO1   | 94.64  | 39.25  | -2.41 | 0.00581  | 0.030979 |
| ENSOARG00000011742 | HIPK2   | 12.25  | 26.73  | 2.18  | 0.005757 | 0.030979 |
| ENSOARG00000014186 | HSF1    | 62.36  | 100.41 | 1.61  | 0.00561  | 0.030979 |
| ENSOARG00000012687 | IPO7    | 76.71  | 147.96 | 1.93  | 0.005954 | 0.030979 |
| ENSOARG00000015578 | LRRC8C  | 29.48  | 86.71  | 2.94  | 0.00571  | 0.030979 |
| ENSOARG00000000082 | MARCHF5 | 33.74  | 61.8   | 1.83  | 0.005606 | 0.030979 |
| ENSOARG00000009878 | MEF2A   | 22.69  | 79.1   | 3.49  | 0.005769 | 0.030979 |
| ENSOARG00000013952 | MORC3   | 11.54  | 26.18  | 2.27  | 0.005857 | 0.030979 |
| ENSOARG00000005356 | MVP     | 59.61  | 29.33  | -2.03 | 0.005639 | 0.030979 |
| ENSOARG00000001695 | NCF2    | 9.32   | 24.02  | 2.58  | 0.005971 | 0.030979 |
| ENSOARG00000008096 | NCS1    | 5.35   | 13.1   | 2.45  | 0.005996 | 0.030979 |
| ENSOARG00000003453 | NMRAL1  | 53.23  | 14.81  | -3.59 | 0.005986 | 0.030979 |
| ENSOARG00000016145 | NPTXR   | 12.36  | 5.31   | -2.33 | 0.005968 | 0.030979 |
| ENSOARG00000004526 | NR1D2   | 29.17  | 82.63  | 2.83  | 0.005769 | 0.030979 |
| ENSOARG00000015967 | NR2C1   | 15.52  | 26.37  | 1.7   | 0.005965 | 0.030979 |
| ENSOARG00000019074 | NYNRIN  | 12.04  | 4.38   | -2.75 | 0.005679 | 0.030979 |
| ENSOARG00000000612 | PERP    | 222.18 | 138.14 | -1.61 | 0.005906 | 0.030979 |
| ENSOARG00000000800 | PEX11G  | 18.54  | 9.93   | -1.87 | 0.005885 | 0.030979 |
| ENSOARG00000016405 | PHKB    | 17.02  | 10.61  | -1.6  | 0.0057   | 0.030979 |
| ENSOARG00000017005 | POLR1D  | 213.02 | 358.63 | 1.68  | 0.005571 | 0.030979 |
| ENSOARG00000019427 | PPARA   | 21.49  | 11.4   | -1.89 | 0.005954 | 0.030979 |
| ENSOARG00000003396 | RAB34   | 41.37  | 21.62  | -1.91 | 0.005992 | 0.030979 |

|                    |          |        |        |       |          |          |
|--------------------|----------|--------|--------|-------|----------|----------|
| ENSOARG00000020254 | RAD51    | 9.11   | 3.37   | -2.7  | 0.005891 | 0.030979 |
| ENSOARG00000007264 | RAD54L2  | 11.65  | 17.9   | 1.54  | 0.005627 | 0.030979 |
| ENSOARG00000000615 | RBBP9    | 31.18  | 8.59   | -3.63 | 0.005788 | 0.030979 |
| ENSOARG00000001658 | RFLNA    | 62.24  | 158.55 | 2.55  | 0.005691 | 0.030979 |
| ENSOARG00000010378 | RFXAP    | 13.68  | 8.14   | -1.68 | 0.005744 | 0.030979 |
| ENSOARG00000017675 | RNASEH2C | 20.24  | 7.66   | -2.64 | 0.005883 | 0.030979 |
| ENSOARG00000010155 | RNF144B  | 9.82   | 20.79  | 2.12  | 0.005732 | 0.030979 |
| ENSOARG00000004525 | RNF187   | 19.78  | 5.61   | -3.53 | 0.005943 | 0.030979 |
| ENSOARG00000020495 | RTP4     | 9.55   | 2.51   | -3.8  | 0.005903 | 0.030979 |
| ENSOARG00000011668 | SBF2     | 21.54  | 32.24  | 1.5   | 0.005923 | 0.030979 |
| ENSOARG00000020966 | SCG3     | 28.24  | 92.55  | 3.28  | 0.005772 | 0.030979 |
| ENSOARG00000013981 | SNAPC3   | 9.85   | 17.23  | 1.75  | 0.005783 | 0.030979 |
| ENSOARG00000008253 | TAPBPL   | 45.52  | 17.17  | -2.65 | 0.005814 | 0.030979 |
| ENSOARG00000016534 | TFPI     | 75.61  | 38.47  | -1.97 | 0.005865 | 0.030979 |
| ENSOARG00000001756 | TMEM176A | 73.98  | 28.2   | -2.62 | 0.005866 | 0.030979 |
| ENSOARG00000011271 | TMOD1    | 62.87  | 218.88 | 3.48  | 0.005858 | 0.030979 |
| ENSOARG00000019450 | TTC38    | 38.69  | 14.32  | -2.7  | 0.005648 | 0.030979 |
| ENSOARG00000008294 | UROC1    | 27.08  | 8.02   | -3.38 | 0.005849 | 0.030979 |
| ENSOARG00000012244 | VTI1A    | 9.9    | 15.24  | 1.54  | 0.005998 | 0.030979 |
| ENSOARG00000000960 | XPO6     | 97.41  | 169.38 | 1.74  | 0.005595 | 0.030979 |
| ENSOARG00000019385 | ZNF512   | 19.63  | 10.76  | -1.82 | 0.005686 | 0.030979 |
| ENSOARG00000009259 | ZNF512B  | 32.9   | 13.59  | -2.42 | 0.005596 | 0.030979 |
| ENSOARG00000007437 | VPS37B   | 12.94  | 28.61  | 2.21  | 0.006044 | 0.031118 |
| ENSOARG00000020347 | FBXO45   | 3.98   | 10.6   | 2.66  | 0.006064 | 0.031123 |
| ENSOARG00000006739 | G6PC3    | 36.22  | 16.74  | -2.16 | 0.006056 | 0.031123 |
| ENSOARG00000011866 | PGAP6    | 62.56  | 35.04  | -1.79 | 0.006066 | 0.031123 |
| ENSOARG00000003654 | SMAD2    | 38.54  | 58.7   | 1.52  | 0.006058 | 0.031123 |
| ENSOARG00000019402 | AMN1     | 8.37   | 15.65  | 1.87  | 0.006085 | 0.031168 |
| ENSOARG00000014629 | CUX1     | 16.69  | 26.95  | 1.61  | 0.006086 | 0.031168 |
| ENSOARG00000013057 | POM121C  | 34.52  | 56.15  | 1.63  | 0.006094 | 0.031168 |
| ENSOARG00000012245 | MTMR12   | 15.28  | 9.19   | -1.66 | 0.006111 | 0.031224 |
| ENSOARG00000020946 | TMOD4    | 16.01  | 5.11   | -3.13 | 0.006122 | 0.031258 |
| ENSOARG00000002261 | COQ2     | 33.4   | 13.6   | -2.46 | 0.006152 | 0.03136  |
| ENSOARG00000020677 | C2orf72  | 45.22  | 7.73   | -5.85 | 0.006217 | 0.031455 |
| ENSOARG00000012440 | GDF15    | 11.48  | 103.81 | 9.04  | 0.006198 | 0.031455 |
| ENSOARG00000016214 | JPT2     | 104.24 | 61.92  | -1.68 | 0.006208 | 0.031455 |
| ENSOARG00000011565 | LIG1     | 17.74  | 10.64  | -1.67 | 0.006209 | 0.031455 |
| ENSOARG00000014630 | MKNK2    | 70.8   | 155.27 | 2.19  | 0.006216 | 0.031455 |
| ENSOARG00000008860 | NFIA     | 21.42  | 9.81   | -2.18 | 0.006207 | 0.031455 |
| ENSOARG00000010266 | SPOPL    | 7.03   | 12.81  | 1.82  | 0.006184 | 0.031455 |
| ENSOARG00000002837 | CCDC117  | 29.91  | 49.16  | 1.64  | 0.00623  | 0.031498 |
| ENSOARG00000012235 | SLC9A3R1 | 212.69 | 101.88 | -2.09 | 0.006243 | 0.031535 |
| ENSOARG00000020867 | CGNL1    | 50.72  | 87.51  | 1.73  | 0.006289 | 0.031663 |

|                    |           |        |        |       |          |          |
|--------------------|-----------|--------|--------|-------|----------|----------|
| ENSOARG00000010801 | PRICKLE3  | 6.25   | 12.75  | 2.04  | 0.006282 | 0.031663 |
| ENSOARG00000014129 | AFM       | 104.35 | 40.82  | -2.56 | 0.006311 | 0.031751 |
| ENSOARG00000024349 | uc_338    | 20.46  | 9.64   | -2.12 | 0.006317 | 0.031752 |
| ENSOARG00000025944 | -         | 26.46  | 98.06  | 3.71  | 0.006404 | 0.031874 |
| ENSOARG00000011512 | ALDH9A1   | 110.55 | 49.55  | -2.23 | 0.006485 | 0.031874 |
| ENSOARG00000001160 | ARAP3     | 33.46  | 57.64  | 1.72  | 0.006455 | 0.031874 |
| ENSOARG00000002627 | ATRN      | 46.08  | 76.6   | 1.66  | 0.006401 | 0.031874 |
| ENSOARG00000008913 | CSRP3     | 61.29  | 127.79 | 2.09  | 0.006389 | 0.031874 |
| ENSOARG00000019670 | CTTNBP2NL | 32.2   | 79.58  | 2.47  | 0.006484 | 0.031874 |
| ENSOARG00000015832 | DEGS1     | 45.94  | 114.16 | 2.48  | 0.006506 | 0.031874 |
| ENSOARG00000006604 | FKBP9     | 75.49  | 48.62  | -1.55 | 0.006411 | 0.031874 |
| ENSOARG00000013637 | FTSJ3     | 19.29  | 11.87  | -1.63 | 0.00649  | 0.031874 |
| ENSOARG00000016773 | KRT18     | 248.14 | 72.03  | -3.44 | 0.006408 | 0.031874 |
| ENSOARG00000016246 | MFSD6     | 17.46  | 37.48  | 2.15  | 0.006455 | 0.031874 |
| ENSOARG00000003781 | OSER1     | 68.18  | 222.65 | 3.27  | 0.006421 | 0.031874 |
| ENSOARG00000016657 | PCSK6     | 133.22 | 71.65  | -1.86 | 0.00645  | 0.031874 |
| ENSOARG00000003311 | POFUT1    | 31.01  | 16.51  | -1.88 | 0.006503 | 0.031874 |
| ENSOARG00000020584 | POLR2H    | 45.04  | 72.1   | 1.6   | 0.006418 | 0.031874 |
| ENSOARG00000004441 | SLC41A1   | 32.33  | 102.44 | 3.17  | 0.006496 | 0.031874 |
| ENSOARG00000019802 | STK38L    | 15.48  | 56.17  | 3.63  | 0.006465 | 0.031874 |
| ENSOARG00000003890 | TAT       | 23.49  | 10.43  | -2.25 | 0.006429 | 0.031874 |
| ENSOARG00000000813 | TECPR1    | 20     | 6.02   | -3.32 | 0.006483 | 0.031874 |
| ENSOARG00000005516 | TUBB4A    | 255.43 | 48.13  | -5.31 | 0.006467 | 0.031874 |
| ENSOARG00000007659 | UPP2      | 6.56   | 1.31   | -5.01 | 0.006435 | 0.031874 |
| ENSOARG00000010360 | XYLT1     | 8.36   | 21.56  | 2.58  | 0.006368 | 0.031874 |
| ENSOARG00000019548 | B3GNT2    | 60.48  | 159.31 | 2.63  | 0.00653  | 0.031957 |
| ENSOARG00000019412 | SPICE1    | 19.12  | 4.5    | -4.25 | 0.006533 | 0.031957 |
| ENSOARG00000005499 | EXOC3L4   | 14.2   | 5.09   | -2.79 | 0.006546 | 0.031997 |
| ENSOARG00000007039 | AGRN      | 33.52  | 10.47  | -3.2  | 0.006556 | 0.032021 |
| ENSOARG00000010247 | ATAD2     | 15.24  | 26.86  | 1.76  | 0.006607 | 0.03209  |
| ENSOARG00000017411 | CSRNP2    | 7.67   | 29.69  | 3.87  | 0.006612 | 0.03209  |
| ENSOARG00000000580 | FLII      | 86.64  | 141.75 | 1.64  | 0.006628 | 0.03209  |
| ENSOARG00000017627 | GPCPD1    | 5.76   | 14.63  | 2.54  | 0.006637 | 0.03209  |
| ENSOARG00000005661 | PSMD5     | 49.53  | 32.7   | -1.51 | 0.006601 | 0.03209  |
| ENSOARG00000005730 | STRN3     | 24.48  | 79.7   | 3.26  | 0.006637 | 0.03209  |
| ENSOARG00000016445 | UBXN1     | 125.51 | 203.22 | 1.62  | 0.006634 | 0.03209  |
| ENSOARG00000020827 | GTF2A2    | 115.73 | 188.45 | 1.63  | 0.006643 | 0.03209  |
| ENSOARG00000004846 | ZNF280B   | 4.73   | 14.14  | 2.99  | 0.006649 | 0.032093 |
| ENSOARG00000006798 | DSC2      | 44.88  | 18.82  | -2.38 | 0.006664 | 0.032116 |
| ENSOARG00000000151 | LNPK      | 10.55  | 16.49  | 1.56  | 0.006669 | 0.032116 |
| ENSOARG00000000373 | CCSER2    | 9.33   | 19.7   | 2.11  | 0.006719 | 0.032125 |
| ENSOARG00000021064 | FERMT2    | 124.76 | 191.77 | 1.54  | 0.006705 | 0.032125 |
| ENSOARG00000020923 | NCK2      | 41.53  | 69.32  | 1.67  | 0.006702 | 0.032125 |



|                    |              |        |        |       |          |          |
|--------------------|--------------|--------|--------|-------|----------|----------|
| ENSOARG00000007707 | NRCAM        | 4.59   | 16.77  | 3.65  | 0.006723 | 0.032125 |
| ENSOARG00000019233 | TAGLN3       | 24.78  | 116.69 | 4.71  | 0.006706 | 0.032125 |
| ENSOARG00000018172 | TMEM205      | 132.92 | 72.87  | -1.82 | 0.006717 | 0.032125 |
| ENSOARG00000004604 | TSC22D2      | 39.99  | 94.14  | 2.35  | 0.006696 | 0.032125 |
| ENSOARG00000010418 | ATF6         | 28.57  | 54.23  | 1.9   | 0.006735 | 0.032143 |
| ENSOARG00000007389 | LOC101112480 | 31.05  | 19.88  | -1.56 | 0.006737 | 0.032143 |
| ENSOARG00000010845 | CLDN3        | 54.46  | 86.65  | 1.59  | 0.006772 | 0.032182 |
| ENSOARG00000017694 | CLDND1       | 44.64  | 94.63  | 2.12  | 0.006777 | 0.032182 |
| ENSOARG00000009090 | CYP1B1       | 32.01  | 52.38  | 1.64  | 0.006761 | 0.032182 |
| ENSOARG00000010025 | SULT1E1      | 48.37  | 9.27   | -5.22 | 0.00677  | 0.032182 |
| ENSOARG00000019140 | TSPO         | 138.16 | 89.31  | -1.55 | 0.006794 | 0.032219 |
| ENSOARG00000019528 | LOC101116390 | 9.91   | 34.1   | 3.44  | 0.006806 | 0.032236 |
| ENSOARG00000002742 | RAP2A        | 14.45  | 27.83  | 1.93  | 0.006809 | 0.032236 |
| ENSOARG00000006835 | FAM107B      | 73.45  | 24.98  | -2.94 | 0.006841 | 0.032289 |
| ENSOARG00000006142 | IFIH1        | 21.58  | 11.68  | -1.85 | 0.006837 | 0.032289 |
| ENSOARG00000019974 | TSPYL4       | 22.87  | 5.51   | -4.15 | 0.006849 | 0.032301 |
| ENSOARG00000005652 | CDCA3        | 8.15   | 2.93   | -2.78 | 0.006858 | 0.032318 |
| ENSOARG00000000067 | ANP32A       | 87.38  | 37.28  | -2.34 | 0.006871 | 0.032334 |
| ENSOARG00000011793 | POGK         | 15.71  | 25.04  | 1.59  | 0.006871 | 0.032334 |
| ENSOARG00000017907 | ZBTB39       | 8.44   | 22.01  | 2.61  | 0.006881 | 0.032354 |
| ENSOARG00000012724 | FLNB         | 52.2   | 122.01 | 2.34  | 0.006907 | 0.032366 |
| ENSOARG00000002410 | IFRD1        | 10.18  | 45.2   | 4.44  | 0.00691  | 0.032366 |
| ENSOARG00000006947 | ITPKC        | 29.88  | 161.78 | 5.41  | 0.006896 | 0.032366 |
| ENSOARG00000009378 | PDZRN3       | 5.36   | 12.29  | 2.29  | 0.0069   | 0.032366 |
| ENSOARG00000011163 | TIMM22       | 36.02  | 22.9   | -1.57 | 0.006891 | 0.032366 |
| ENSOARG00000019702 | -            | 35.43  | 9.79   | -3.62 | 0.007027 | 0.032521 |
| ENSOARG00000013120 | BRPF3        | 21.29  | 61.72  | 2.9   | 0.007035 | 0.032521 |
| ENSOARG00000005146 | COX20        | 56.2   | 24.95  | -2.25 | 0.007037 | 0.032521 |
| ENSOARG00000018770 | CXorf21      | 10.63  | 5.59   | -1.9  | 0.007013 | 0.032521 |
| ENSOARG00000017154 | ESS2         | 19.46  | 31.61  | 1.62  | 0.007007 | 0.032521 |
| ENSOARG00000012121 | FAM214B      | 27.09  | 52.66  | 1.94  | 0.006988 | 0.032521 |
| ENSOARG00000014036 | GUCD1        | 16.27  | 9.76   | -1.67 | 0.007048 | 0.032521 |
| ENSOARG00000004814 | LPCAT3       | 32.65  | 18.66  | -1.75 | 0.007019 | 0.032521 |
| ENSOARG00000006411 | MED27        | 54.8   | 181.43 | 3.31  | 0.007    | 0.032521 |
| ENSOARG00000011961 | NME4         | 62.77  | 30.19  | -2.08 | 0.006964 | 0.032521 |
| ENSOARG00000012749 | PCGF1        | 9.76   | 30.09  | 3.08  | 0.00697  | 0.032521 |
| ENSOARG00000016224 | PPP1R3C      | 48.54  | 120.56 | 2.48  | 0.007014 | 0.032521 |
| ENSOARG00000014875 | SIGLEC5      | 20.54  | 11.02  | -1.86 | 0.007007 | 0.032521 |
| ENSOARG00000005763 | SLC25A23     | 8.73   | 3.37   | -2.59 | 0.00703  | 0.032521 |
| ENSOARG00000013238 | SLC39A8      | 19.25  | 10.47  | -1.84 | 0.006994 | 0.032521 |
| ENSOARG00000018560 | USP46        | 21.4   | 71.01  | 3.32  | 0.007046 | 0.032521 |
| ENSOARG00000020553 | BCL9         | 15.99  | 34.55  | 2.16  | 0.007088 | 0.032542 |
| ENSOARG00000001461 | DELE1        | 38.68  | 59.68  | 1.54  | 0.007096 | 0.032542 |

|                    |          |        |        |       |          |          |
|--------------------|----------|--------|--------|-------|----------|----------|
| ENSOARG00000017085 | MED15    | 9.48   | 15.32  | 1.62  | 0.007078 | 0.032542 |
| ENSOARG00000015059 | METTL6   | 14.93  | 22.52  | 1.51  | 0.007069 | 0.032542 |
| ENSOARG00000011809 | PRADC1   | 16.73  | 10.12  | -1.65 | 0.007078 | 0.032542 |
| ENSOARG00000010507 | RABGEF1  | 17.35  | 32.19  | 1.86  | 0.00707  | 0.032542 |
| ENSOARG00000012308 | TBC1D25  | 18.58  | 33.78  | 1.82  | 0.007096 | 0.032542 |
| ENSOARG00000006639 | CRIP3    | 9.71   | 1.03   | -9.43 | 0.007116 | 0.032593 |
| ENSOARG00000012494 | LNx2     | 19.64  | 40.83  | 2.08  | 0.007151 | 0.032638 |
| ENSOARG00000017397 | RHOBTB3  | 23.37  | 15.03  | -1.55 | 0.007132 | 0.032638 |
| ENSOARG00000020994 | SLC27A2  | 16.59  | 36.07  | 2.17  | 0.007151 | 0.032638 |
| ENSOARG00000012368 | STEAP3   | 84.62  | 41.17  | -2.06 | 0.007152 | 0.032638 |
| ENSOARG00000009504 | PFDN2    | 149.21 | 234.44 | 1.57  | 0.007164 | 0.032656 |
| ENSOARG00000013732 | ARHGAP18 | 57.6   | 161.01 | 2.8   | 0.007178 | 0.032679 |
| ENSOARG00000018928 | NAPEPLD  | 10.1   | 4.12   | -2.45 | 0.007183 | 0.032679 |
| ENSOARG00000005150 | ONECUT2  | 27.49  | 17.5   | -1.57 | 0.007204 | 0.032726 |
| ENSOARG00000013480 | JAK2     | 24.34  | 59.08  | 2.43  | 0.007263 | 0.032875 |
| ENSOARG00000004654 | PICALM   | 144.22 | 223.53 | 1.55  | 0.00727  | 0.032882 |
| ENSOARG00000010013 | EMC1     | 61.72  | 39.36  | -1.57 | 0.007287 | 0.03291  |
| ENSOARG00000005553 | -        | 111.94 | 47.49  | -2.36 | 0.007342 | 0.032989 |
| ENSOARG00000016436 | FAM83H   | 32.19  | 17.98  | -1.79 | 0.00735  | 0.032989 |
| ENSOARG00000008216 | PDP1     | 19.25  | 42.34  | 2.2   | 0.007341 | 0.032989 |
| ENSOARG00000010395 | TGIF1    | 36.55  | 98.86  | 2.7   | 0.007338 | 0.032989 |
| ENSOARG00000016428 | COX10    | 15.54  | 27.72  | 1.78  | 0.007376 | 0.033024 |
| ENSOARG00000004506 | OTUD1    | 25.61  | 138.01 | 5.39  | 0.007372 | 0.033024 |
| ENSOARG00000002241 | CSRNP1   | 40.9   | 140.44 | 3.43  | 0.007407 | 0.033093 |
| ENSOARG00000001561 | TOE1     | 29.47  | 51.98  | 1.76  | 0.007406 | 0.033093 |
| ENSOARG00000017492 | METTL7A  | 57.92  | 18.46  | -3.14 | 0.007421 | 0.033094 |
| ENSOARG00000001611 | SLC25A12 | 16.61  | 7.98   | -2.08 | 0.007424 | 0.033094 |
| ENSOARG00000005519 | PIPOX    | 23.91  | 6.67   | -3.58 | 0.007432 | 0.033106 |
| ENSOARG00000014137 | MAT2B    | 48.47  | 73.76  | 1.52  | 0.007447 | 0.03313  |
| ENSOARG00000004952 | NUDT9    | 70.2   | 195.6  | 2.79  | 0.007448 | 0.03313  |
| ENSOARG00000003356 | RFC5     | 27.77  | 18.41  | -1.51 | 0.007456 | 0.033141 |
| ENSOARG00000006304 | DCTN2    | 75.32  | 113.06 | 1.5   | 0.007474 | 0.033152 |
| ENSOARG00000011198 | FAM234A  | 67.06  | 39.64  | -1.69 | 0.007474 | 0.033152 |
| ENSOARG00000020570 | ATOH8    | 10.85  | 2.03   | -5.34 | 0.007554 | 0.033201 |
| ENSOARG00000006900 | C1orf116 | 9.39   | 18.08  | 1.93  | 0.00756  | 0.033201 |
| ENSOARG00000005689 | CCDC125  | 21.15  | 12.83  | -1.65 | 0.007545 | 0.033201 |
| ENSOARG00000006435 | CLIC4    | 329.18 | 769.6  | 2.34  | 0.007528 | 0.033201 |
| ENSOARG00000007070 | GCLC     | 56.15  | 119.13 | 2.12  | 0.007527 | 0.033201 |
| ENSOARG00000007931 | GTPBP2   | 85.76  | 307.65 | 3.59  | 0.007551 | 0.033201 |
| ENSOARG00000005421 | NDRG1    | 185.25 | 592.84 | 3.2   | 0.007521 | 0.033201 |
| ENSOARG00000017288 | PLEKHA3  | 27.56  | 60.56  | 2.2   | 0.007559 | 0.033201 |
| ENSOARG00000012738 | RRAGD    | 7.55   | 18.89  | 2.5   | 0.007557 | 0.033201 |
| ENSOARG00000001191 | TMEM140  | 28.51  | 13.9   | -2.05 | 0.007519 | 0.033201 |

|                    |          |        |        |       |          |          |
|--------------------|----------|--------|--------|-------|----------|----------|
| ENSOARG00000010179 | TRIM24   | 18.05  | 33.8   | 1.87  | 0.007558 | 0.033201 |
| ENSOARG00000001259 | UBE2Q2   | 40.25  | 88.01  | 2.19  | 0.007568 | 0.033209 |
| ENSOARG00000002179 | GLT8D1   | 42.32  | 24.29  | -1.74 | 0.007574 | 0.033213 |
| ENSOARG00000017149 | UBFD1    | 52.09  | 34.25  | -1.52 | 0.007598 | 0.033246 |
| ENSOARG00000020645 | YEATS2   | 10.36  | 18.43  | 1.78  | 0.007592 | 0.033246 |
| ENSOARG00000000882 | -        | 10.66  | 21.85  | 2.05  | 0.007693 | 0.033268 |
| ENSOARG00000006265 | AGPAT5   | 11.74  | 20.11  | 1.71  | 0.007742 | 0.033268 |
| ENSOARG00000014351 | ATP9A    | 28.5   | 14.73  | -1.93 | 0.007684 | 0.033268 |
| ENSOARG00000004379 | C1RL     | 37.24  | 14.77  | -2.52 | 0.007668 | 0.033268 |
| ENSOARG00000012943 | CRTC3    | 15.32  | 45.11  | 2.94  | 0.007691 | 0.033268 |
| ENSOARG00000011088 | FAM136A  | 43.74  | 21.6   | -2.03 | 0.007731 | 0.033268 |
| ENSOARG00000010969 | GPAM     | 12.49  | 3.58   | -3.49 | 0.007654 | 0.033268 |
| ENSOARG00000000392 | GPRIN3   | 4.62   | 12.3   | 2.66  | 0.007638 | 0.033268 |
| ENSOARG00000014161 | HIGD1A   | 16.55  | 101.93 | 6.16  | 0.007727 | 0.033268 |
| ENSOARG00000011840 | ISYNA1   | 67.52  | 30.29  | -2.23 | 0.007748 | 0.033268 |
| ENSOARG00000006067 | MACO1    | 44.65  | 74.58  | 1.67  | 0.007655 | 0.033268 |
| ENSOARG00000020358 | PAK2     | 106.42 | 320.1  | 3.01  | 0.007712 | 0.033268 |
| ENSOARG00000003501 | PDK4     | 28.88  | 9.35   | -3.09 | 0.007717 | 0.033268 |
| ENSOARG00000015882 | PPFIBP2  | 14.86  | 6.16   | -2.41 | 0.007731 | 0.033268 |
| ENSOARG00000007740 | PPP3CB   | 11.67  | 19.08  | 1.63  | 0.007739 | 0.033268 |
| ENSOARG00000016748 | SECTM1   | 48.31  | 15.52  | -3.11 | 0.007714 | 0.033268 |
| ENSOARG00000010679 | SLC25A19 | 15.58  | 8.79   | -1.77 | 0.007733 | 0.033268 |
| ENSOARG00000020797 | TPM1     | 318.37 | 198.57 | -1.6  | 0.007747 | 0.033268 |
| ENSOARG00000010765 | UAP1     | 96.56  | 156.21 | 1.62  | 0.007731 | 0.033268 |
| ENSOARG00000002503 | ATXN2L   | 96.08  | 161.09 | 1.68  | 0.00776  | 0.033274 |
| ENSOARG00000013666 | SCYL2    | 28.42  | 55.44  | 1.95  | 0.007756 | 0.033274 |
| ENSOARG00000000445 | TCEAL2   | 27.17  | 15.85  | -1.71 | 0.007771 | 0.033274 |
| ENSOARG00000019145 | TST      | 68.03  | 27.05  | -2.51 | 0.007768 | 0.033274 |
| ENSOARG00000006200 | NES      | 151.44 | 360.27 | 2.38  | 0.007787 | 0.033321 |
| ENSOARG00000011941 | TJP3     | 8.87   | 2.85   | -3.11 | 0.007832 | 0.033487 |
| ENSOARG00000008626 | PRRG3    | 32.39  | 8.8    | -3.68 | 0.007864 | 0.033604 |
| ENSOARG00000003193 | C1QTNF1  | 80.17  | 43.68  | -1.84 | 0.007875 | 0.033605 |
| ENSOARG00000001274 | CDC25B   | 31.3   | 64.07  | 2.05  | 0.007911 | 0.033637 |
| ENSOARG00000019710 | GPR39    | 13.13  | 5.29   | -2.48 | 0.007913 | 0.033637 |
| ENSOARG00000004224 | LAPTM4B  | 116.99 | 71.65  | -1.63 | 0.007937 | 0.033637 |
| ENSOARG00000001468 | MAPK8    | 16.93  | 31.3   | 1.85  | 0.007936 | 0.033637 |
| ENSOARG00000009845 | OSMR     | 66.4   | 24.22  | -2.74 | 0.007916 | 0.033637 |
| ENSOARG00000010334 | TMPRSS2  | 5.06   | 13.83  | 2.73  | 0.007921 | 0.033637 |
| ENSOARG00000001460 | DENND10  | 28.82  | 17.54  | -1.64 | 0.008014 | 0.033825 |
| ENSOARG00000006922 | FBRS     | 26.89  | 40.58  | 1.51  | 0.007995 | 0.033825 |
| ENSOARG00000005821 | PMAIP1   | 183.35 | 326.07 | 1.78  | 0.008005 | 0.033825 |
| ENSOARG00000000411 | TIGD2    | 15.21  | 7.79   | -1.95 | 0.008051 | 0.033908 |
| ENSOARG00000012361 | BACH2    | 3.27   | 11.81  | 3.61  | 0.008098 | 0.033979 |

|                     |         |        |        |       |          |          |
|---------------------|---------|--------|--------|-------|----------|----------|
| ENSOARG00000019900  | FSTL1   | 407.8  | 213.61 | -1.91 | 0.0081   | 0.033979 |
| ENSOARG00000015727  | LUM     | 31.53  | 20.02  | -1.57 | 0.008097 | 0.033979 |
| ENSOARG00000001638  | RPL36A  | 501.87 | 772.25 | 1.54  | 0.008098 | 0.033979 |
| ENSOARG000000019278 | THTPA   | 23.95  | 14.57  | -1.64 | 0.008094 | 0.033979 |
| ENSOARG00000005419  | TTC7A   | 19.77  | 9.36   | -2.11 | 0.008081 | 0.033979 |
| ENSOARG00000007726  | CFAP97  | 35.48  | 62.02  | 1.75  | 0.008115 | 0.034017 |
| ENSOARG000000018773 | BMP2K   | 20.81  | 47.75  | 2.29  | 0.008122 | 0.034025 |
| ENSOARG000000018901 | PPIC    | 118.79 | 74.71  | -1.59 | 0.008139 | 0.034047 |
| ENSOARG00000007169  | KLF4    | 19.38  | 56.66  | 2.92  | 0.008167 | 0.034103 |
| ENSOARG00000000884  | SAAL1   | 15.69  | 6.72   | -2.33 | 0.008168 | 0.034103 |
| ENSOARG00000007752  | SP2     | 11.75  | 21.5   | 1.83  | 0.008178 | 0.03412  |
| ENSOARG000000008550 | -       | 82.23  | 33.14  | -2.48 | 0.008193 | 0.034158 |
| ENSOARG00000007929  | GPX3    | 1598.2 | 935.6  | -1.71 | 0.008209 | 0.034179 |
| ENSOARG00000007289  | STK35   | 12.61  | 21.98  | 1.74  | 0.008209 | 0.034179 |
| ENSOARG000000018242 | VCAM1   | 7.79   | 1.85   | -4.21 | 0.008214 | 0.034179 |
| ENSOARG000000017402 | APOB    | 195.94 | 473.36 | 2.42  | 0.008226 | 0.034182 |
| ENSOARG00000005518  | GPX7    | 196.54 | 125.36 | -1.57 | 0.00825  | 0.034257 |
| ENSOARG000000019605 | BRD1    | 17.82  | 32.88  | 1.85  | 0.008273 | 0.034263 |
| ENSOARG000000017620 | DTYMK   | 27.09  | 14.84  | -1.83 | 0.008271 | 0.034263 |
| ENSOARG000000017125 | TMEM223 | 110.01 | 57.94  | -1.9  | 0.008269 | 0.034263 |
| ENSOARG000000013406 | AFF4    | 29.26  | 58.14  | 1.99  | 0.008419 | 0.034278 |
| ENSOARG000000019568 | AGO4    | 15.11  | 27.87  | 1.84  | 0.008431 | 0.034278 |
| ENSOARG000000006030 | AKNA    | 8.49   | 14.39  | 1.69  | 0.008349 | 0.034278 |
| ENSOARG000000009005 | C2CD3   | 8.13   | 13.31  | 1.64  | 0.008471 | 0.034278 |
| ENSOARG000000013509 | CD274   | 3.19   | 11.45  | 3.59  | 0.008369 | 0.034278 |
| ENSOARG000000005825 | ECHDC2  | 26.57  | 8.17   | -3.25 | 0.008296 | 0.034278 |
| ENSOARG000000013202 | FCGRT   | 270.64 | 161.27 | -1.68 | 0.008448 | 0.034278 |
| ENSOARG000000017062 | IL17D   | 7.04   | 1.86   | -3.78 | 0.008497 | 0.034278 |
| ENSOARG000000020519 | KNG1    | 489.62 | 167    | -2.93 | 0.008402 | 0.034278 |
| ENSOARG000000002607 | LENG8   | 63.67  | 32.77  | -1.94 | 0.008467 | 0.034278 |
| ENSOARG000000017150 | LHFPL2  | 31.01  | 47.48  | 1.53  | 0.008482 | 0.034278 |
| ENSOARG000000019872 | LPCAT4  | 13.66  | 6.56   | -2.08 | 0.008501 | 0.034278 |
| ENSOARG000000017861 | MBLAC1  | 18.92  | 12.57  | -1.51 | 0.008421 | 0.034278 |
| ENSOARG000000016152 | MTMR10  | 16.12  | 34.01  | 2.11  | 0.008411 | 0.034278 |
| ENSOARG000000014849 | NEDD9   | 14.13  | 23.97  | 1.7   | 0.008471 | 0.034278 |
| ENSOARG000000004075 | NISCH   | 21.52  | 13.97  | -1.54 | 0.008404 | 0.034278 |
| ENSOARG000000009521 | NIT1    | 18.98  | 9.83   | -1.93 | 0.008428 | 0.034278 |
| ENSOARG000000001166 | NRIP1   | 28.76  | 96.3   | 3.35  | 0.008356 | 0.034278 |
| ENSOARG000000006047 | PLS1    | 12.86  | 5.82   | -2.21 | 0.008338 | 0.034278 |
| ENSOARG000000013260 | PRR12   | 9.87   | 4.67   | -2.11 | 0.008495 | 0.034278 |
| ENSOARG000000000539 | RIOX1   | 15.33  | 9.17   | -1.67 | 0.008427 | 0.034278 |
| ENSOARG000000015547 | SEC16B  | 9.04   | 3.55   | -2.55 | 0.008303 | 0.034278 |
| ENSOARG000000015749 | SLC12A9 | 13.14  | 6.62   | -1.98 | 0.008491 | 0.034278 |

|                    |          |        |        |       |          |          |
|--------------------|----------|--------|--------|-------|----------|----------|
| ENSOARG00000013255 | SMARCB1  | 71.89  | 113.87 | 1.58  | 0.008455 | 0.034278 |
| ENSOARG00000004583 | SNRNP35  | 19.63  | 12.72  | -1.54 | 0.008467 | 0.034278 |
| ENSOARG00000018336 | TMBIM6   | 401.44 | 241.11 | -1.66 | 0.008448 | 0.034278 |
| ENSOARG00000020813 | VPS13C   | 13.98  | 22.84  | 1.63  | 0.008438 | 0.034278 |
| ENSOARG00000001300 | XYLB     | 23.29  | 7.49   | -3.11 | 0.008462 | 0.034278 |
| ENSOARG00000005359 | CARHSP1  | 358.75 | 222.79 | -1.61 | 0.008518 | 0.03429  |
| ENSOARG00000011462 | AGXT2    | 16.94  | 7.57   | -2.24 | 0.00857  | 0.034353 |
| ENSOARG00000018182 | EFR3B    | 7.95   | 19.89  | 2.5   | 0.008572 | 0.034353 |
| ENSOARG00000018146 | FICD     | 12.66  | 24.14  | 1.91  | 0.008561 | 0.034353 |
| ENSOARG00000014418 | GRK4     | 18.69  | 10.88  | -1.72 | 0.008576 | 0.034353 |
| ENSOARG00000008915 | HNRNPLL  | 12.45  | 18.63  | 1.5   | 0.008584 | 0.034353 |
| ENSOARG00000013265 | SMARCA2  | 16.53  | 4.84   | -3.42 | 0.008565 | 0.034353 |
| ENSOARG00000018927 | XK       | 17.41  | 10.1   | -1.72 | 0.008554 | 0.034353 |
| ENSOARG00000017810 | SEPTIN2  | 158.06 | 100.57 | -1.57 | 0.008591 | 0.034357 |
| ENSOARG00000012053 | ACOX2    | 55.7   | 9.6    | -5.8  | 0.0086   | 0.034372 |
| ENSOARG00000017133 | PCNA     | 77.79  | 47.77  | -1.63 | 0.008608 | 0.034382 |
| ENSOARG00000010100 | YPEL4    | 1.55   | 13.33  | 8.6   | 0.00862  | 0.034409 |
| ENSOARG00000004136 | ZFP42    | 17.51  | 5.95   | -2.94 | 0.008631 | 0.034431 |
| ENSOARG00000008103 | ZSWIM4   | 9.06   | 20.33  | 2.24  | 0.008639 | 0.034441 |
| ENSOARG00000007504 | GSTO1    | 101.54 | 45.32  | -2.24 | 0.008679 | 0.034508 |
| ENSOARG00000009781 | SMCHD1   | 7.63   | 14.09  | 1.85  | 0.008674 | 0.034508 |
| ENSOARG00000013551 | ARHGAP20 | 1.47   | 8.62   | 5.86  | 0.008714 | 0.034517 |
| ENSOARG00000010764 | HCCS     | 23.01  | 35.46  | 1.54  | 0.008713 | 0.034517 |
| ENSOARG00000005206 | OPTN     | 94.5   | 163.75 | 1.73  | 0.008689 | 0.034517 |
| ENSOARG00000004328 | ELOVL6   | 35.87  | 21.74  | -1.65 | 0.008744 | 0.034564 |
| ENSOARG00000008274 | HSF2     | 10.98  | 24.3   | 2.21  | 0.008745 | 0.034564 |
| ENSOARG00000008186 | SH3BP5L  | 26     | 14.85  | -1.75 | 0.008754 | 0.034564 |
| ENSOARG00000013971 | ZEB1     | 17.74  | 59.43  | 3.35  | 0.008753 | 0.034564 |
| ENSOARG00000007947 | TMEM178A | 6.31   | 12.34  | 1.96  | 0.00876  | 0.034566 |
| ENSOARG00000013387 | APEH     | 47.96  | 25.02  | -1.92 | 0.008779 | 0.034594 |
| ENSOARG00000004310 | CXXC1    | 24.26  | 15.69  | -1.55 | 0.008788 | 0.034594 |
| ENSOARG00000017039 | H2AX     | 78.44  | 38.04  | -2.06 | 0.008789 | 0.034594 |
| ENSOARG00000010589 | SMARCA5  | 95.03  | 154.93 | 1.63  | 0.008795 | 0.034594 |
| ENSOARG00000017236 | PUM2     | 34.04  | 59.27  | 1.74  | 0.008809 | 0.034624 |
| ENSOARG00000013975 | CIAO1    | 20.57  | 10.92  | -1.88 | 0.008836 | 0.034662 |
| ENSOARG00000018417 | CLN6     | 23.77  | 14.87  | -1.6  | 0.008841 | 0.034662 |
| ENSOARG00000003423 | CYP1A1   | 20.54  | 3.65   | -5.63 | 0.008891 | 0.034662 |
| ENSOARG00000009872 | LONRF1   | 18.54  | 45.41  | 2.45  | 0.008891 | 0.034662 |
| ENSOARG00000003352 | NFIL3    | 55.57  | 167.73 | 3.02  | 0.008883 | 0.034662 |
| ENSOARG00000017000 | TEC      | 8.48   | 22.46  | 2.65  | 0.008851 | 0.034662 |
| ENSOARG00000019527 | TMBIM1   | 320.75 | 610.03 | 1.9   | 0.008824 | 0.034662 |
| ENSOARG00000005219 | TMEM18   | 19.48  | 34.99  | 1.8   | 0.008872 | 0.034662 |
| ENSOARG00000009741 | WDR34    | 12.01  | 6.51   | -1.84 | 0.008872 | 0.034662 |

|                     |              |        |        |       |          |          |
|---------------------|--------------|--------|--------|-------|----------|----------|
| ENSOARG00000014088  | C6orf89      | 63.7   | 121.29 | 1.9   | 0.008936 | 0.034774 |
| ENSOARG00000005679  | PAFAH2       | 20.64  | 12.88  | -1.6  | 0.008943 | 0.034774 |
| ENSOARG00000016055  | PRELID3B     | 41.22  | 76.4   | 1.85  | 0.008938 | 0.034774 |
| ENSOARG00000010842  | ZC3HAV1L     | 13.18  | 7.11   | -1.85 | 0.008954 | 0.034774 |
| ENSOARG00000018681  | CAVIN3       | 34.43  | 10.69  | -3.22 | 0.008987 | 0.034836 |
| ENSOARG00000005855  | LOC101114987 | 30.65  | 46.05  | 1.5   | 0.008983 | 0.034836 |
| ENSOARG00000016864  | LONP2        | 112.11 | 70.54  | -1.59 | 0.008976 | 0.034836 |
| ENSOARG00000015734  | CBY1         | 26.93  | 17.83  | -1.51 | 0.009005 | 0.034887 |
| ENSOARG00000009598  | APTX         | 15.6   | 8.89   | -1.75 | 0.009017 | 0.034911 |
| ENSOARG00000005177  | SLK          | 22.96  | 64.84  | 2.82  | 0.009048 | 0.035002 |
| ENSOARG00000007142  | SSBP3        | 45.88  | 18.65  | -2.46 | 0.009052 | 0.035002 |
| ENSOARG000000021096 | KTN1         | 48.56  | 78.05  | 1.61  | 0.009133 | 0.035187 |
| ENSOARG000000021150 | MTHFD1       | 38.98  | 25.62  | -1.52 | 0.009123 | 0.035187 |
| ENSOARG00000007224  | SSBP3        | 46.74  | 14.43  | -3.24 | 0.009109 | 0.035187 |
| ENSOARG00000017950  | TNRC6A       | 15.1   | 7.58   | -1.99 | 0.009132 | 0.035187 |
| ENSOARG00000018036  | ECI1         | 12.33  | 6.72   | -1.83 | 0.009143 | 0.035201 |
| ENSOARG00000020076  | H2BC8        | 46.2   | 87.47  | 1.89  | 0.009179 | 0.035226 |
| ENSOARG00000004641  | PFN2         | 15.57  | 7.51   | -2.07 | 0.009183 | 0.035226 |
| ENSOARG00000009771  | RNF113B      | 21.16  | 9.48   | -2.23 | 0.009164 | 0.035226 |
| ENSOARG00000015964  | TACC3        | 18.05  | 10.53  | -1.71 | 0.009168 | 0.035226 |
| ENSOARG00000013437  | CDC37L1      | 17.61  | 45.54  | 2.59  | 0.009206 | 0.035266 |
| ENSOARG00000008042  | RIOK3        | 37.23  | 90.49  | 2.43  | 0.009202 | 0.035266 |
| ENSOARG00000013764  | HNF1A        | 26.9   | 11.1   | -2.42 | 0.009243 | 0.035347 |
| ENSOARG00000014671  | NF1          | 14.56  | 23.33  | 1.6   | 0.009244 | 0.035347 |
| ENSOARG00000018645  | ELF5         | 11.66  | 5.51   | -2.12 | 0.009276 | 0.035374 |
| ENSOARG00000014604  | IGFBP4       | 675.16 | 198.64 | -3.4  | 0.009267 | 0.035374 |
| ENSOARG00000007986  | MBIP         | 33.62  | 13.75  | -2.45 | 0.009257 | 0.035374 |
| ENSOARG00000007710  | RNF157       | 6.92   | 13.71  | 1.98  | 0.009285 | 0.035374 |
| ENSOARG00000008200  | ZNF574       | 17.46  | 35.47  | 2.03  | 0.009312 | 0.035432 |
| ENSOARG00000005384  | -            | 254.52 | 92.39  | -2.75 | 0.009603 | 0.035435 |
| ENSOARG00000003411  | AKAP8L       | 43.51  | 22.65  | -1.92 | 0.009323 | 0.035435 |
| ENSOARG00000015661  | APOH         | 515.42 | 236.23 | -2.18 | 0.009585 | 0.035435 |
| ENSOARG00000006757  | CHCHD3       | 46.55  | 72.24  | 1.55  | 0.009601 | 0.035435 |
| ENSOARG00000016037  | CRAMP1       | 8.58   | 15.1   | 1.76  | 0.009403 | 0.035435 |
| ENSOARG00000006284  | DCTPP1       | 54.3   | 27.45  | -1.98 | 0.009541 | 0.035435 |
| ENSOARG00000011506  | DNAJC21      | 32.7   | 73.82  | 2.26  | 0.009358 | 0.035435 |
| ENSOARG00000013715  | E2F5         | 14.88  | 29.05  | 1.95  | 0.009603 | 0.035435 |
| ENSOARG00000003767  | EPHX3        | 7.39   | 12.47  | 1.69  | 0.009424 | 0.035435 |
| ENSOARG00000005637  | ETV4         | 41.84  | 25.48  | -1.64 | 0.009349 | 0.035435 |
| ENSOARG00000006178  | FAM20C       | 110.52 | 57.45  | -1.92 | 0.009566 | 0.035435 |
| ENSOARG00000007271  | HAAO         | 139.98 | 70.62  | -1.98 | 0.009482 | 0.035435 |
| ENSOARG00000015310  | HPGD         | 23.22  | 11.37  | -2.04 | 0.009579 | 0.035435 |
| ENSOARG00000017302  | HS1BP3       | 19.04  | 34.02  | 1.79  | 0.009421 | 0.035435 |

|                     |          |        |         |       |          |          |
|---------------------|----------|--------|---------|-------|----------|----------|
| ENSOARG00000004779  | HSD17B11 | 369.33 | 729.68  | 1.98  | 0.009461 | 0.035435 |
| ENSOARG000000017655 | KAT5     | 22.43  | 48.02   | 2.14  | 0.009581 | 0.035435 |
| ENSOARG000000020961 | MARCKSL1 | 246.06 | 135.45  | -1.82 | 0.009543 | 0.035435 |
| ENSOARG000000011978 | MIEN1    | 34.67  | 61.7    | 1.78  | 0.009538 | 0.035435 |
| ENSOARG00000001685  | MMACHC   | 16.35  | 9.15    | -1.79 | 0.009489 | 0.035435 |
| ENSOARG000000014738 | MTTP     | 65.14  | 25.92   | -2.51 | 0.00936  | 0.035435 |
| ENSOARG000000010167 | NR2F2    | 29.97  | 12.16   | -2.46 | 0.009521 | 0.035435 |
| ENSOARG000000017630 | NR2F6    | 29.13  | 11.72   | -2.49 | 0.00939  | 0.035435 |
| ENSOARG000000016112 | NRBP2    | 29.74  | 15.33   | -1.94 | 0.009616 | 0.035435 |
| ENSOARG000000019516 | PCBP1    | 629.36 | 1079.01 | 1.71  | 0.009451 | 0.035435 |
| ENSOARG000000005078 | PHF10    | 20.02  | 11.06   | -1.81 | 0.009573 | 0.035435 |
| ENSOARG000000011874 | PNISR    | 19.05  | 12.13   | -1.57 | 0.009394 | 0.035435 |
| ENSOARG000000006389 | PPM1B    | 81.48  | 121.88  | 1.5   | 0.009434 | 0.035435 |
| ENSOARG000000009903 | PRAG1    | 16.68  | 56.67   | 3.4   | 0.009368 | 0.035435 |
| ENSOARG000000004288 | RBP5     | 39.1   | 6.58    | -5.94 | 0.009436 | 0.035435 |
| ENSOARG000000000450 | S100A8   | 33.36  | 18.46   | -1.81 | 0.009574 | 0.035435 |
| ENSOARG000000018193 | SLC25A10 | 21.37  | 5.48    | -3.9  | 0.009349 | 0.035435 |
| ENSOARG000000020471 | SLC2A1   | 54.92  | 204.65  | 3.73  | 0.009397 | 0.035435 |
| ENSOARG000000010066 | STRN     | 16.15  | 27.13   | 1.68  | 0.009327 | 0.035435 |
| ENSOARG000000008349 | TACSTD2  | 12.07  | 33.61   | 2.78  | 0.00945  | 0.035435 |
| ENSOARG000000012535 | TNS3     | 28.33  | 14.42   | -1.96 | 0.009568 | 0.035435 |
| ENSOARG000000015151 | ZFAND3   | 84.37  | 147.19  | 1.74  | 0.009628 | 0.035435 |
| ENSOARG000000016794 | ZMYM3    | 18.7   | 9.92    | -1.89 | 0.009621 | 0.035435 |
| ENSOARG000000006773 | ZNF689   | 17.67  | 29.79   | 1.69  | 0.009453 | 0.035435 |
| ENSOARG000000003242 | ZNF787   | 13.36  | 26.19   | 1.96  | 0.009527 | 0.035435 |
| ENSOARG000000003075 | -        | 87.9   | 58.22   | -1.51 | 0.009644 | 0.035473 |
| ENSOARG000000000620 | CCDC85C  | 9.38   | 3.39    | -2.77 | 0.009683 | 0.035485 |
| ENSOARG000000008672 | CDC34    | 81.65  | 125.58  | 1.54  | 0.009667 | 0.035485 |
| ENSOARG000000015873 | KIF20A   | 9.35   | 3.91    | -2.39 | 0.009693 | 0.035485 |
| ENSOARG000000014227 | SUCO     | 16.66  | 56.73   | 3.41  | 0.009674 | 0.035485 |
| ENSOARG000000000909 | THOC6    | 20.18  | 32.83   | 1.63  | 0.009699 | 0.035485 |
| ENSOARG000000011650 | TMC7     | 2.6    | 8.39    | 3.23  | 0.009688 | 0.035485 |
| ENSOARG000000020374 | ACSL3    | 40.14  | 77.98   | 1.94  | 0.00973  | 0.035519 |
| ENSOARG000000011728 | BCL9L    | 47.1   | 21.08   | -2.23 | 0.009737 | 0.035519 |
| ENSOARG000000001051 | REPS1    | 23.75  | 48.33   | 2.03  | 0.009738 | 0.035519 |
| ENSOARG000000000191 | SULT1C4  | 44.59  | 8.6     | -5.18 | 0.009744 | 0.035519 |
| ENSOARG000000015354 | LRP5     | 115.49 | 61.57   | -1.88 | 0.009773 | 0.035525 |
| ENSOARG000000001311 | NDEL1    | 39.79  | 74.32   | 1.87  | 0.009763 | 0.035525 |
| ENSOARG000000008417 | PLEKHA8  | 12.26  | 20.33   | 1.66  | 0.009789 | 0.035539 |
| ENSOARG000000016927 | SIAH1    | 24.15  | 38.16   | 1.58  | 0.0098   | 0.035539 |
| ENSOARG000000005512 | TAF15    | 43.34  | 24.77   | -1.75 | 0.009799 | 0.035539 |
| ENSOARG000000025194 | ARL4C    | 53.66  | 161.21  | 3     | 0.009839 | 0.035647 |
| ENSOARG000000017264 | BMP6     | 26.3   | 69.5    | 2.64  | 0.009842 | 0.035647 |

|                    |           |        |        |       |          |          |
|--------------------|-----------|--------|--------|-------|----------|----------|
| ENSOARG00000014363 | RASSF6    | 15.36  | 49.26  | 3.21  | 0.00986  | 0.035679 |
| ENSOARG00000010412 | RIPK4     | 5.96   | 29.79  | 5     | 0.009873 | 0.035679 |
| ENSOARG00000017748 | SLC3A2    | 134.93 | 252.23 | 1.87  | 0.009869 | 0.035679 |
| ENSOARG00000007977 | C1QB      | 537.75 | 354.93 | -1.52 | 0.009889 | 0.035714 |
| ENSOARG00000013581 | BRAF      | 7.13   | 15.16  | 2.13  | 0.009901 | 0.035737 |
| ENSOARG00000001510 | KIAA0753  | 21.67  | 7.67   | -2.83 | 0.009925 | 0.035739 |
| ENSOARG00000007520 | PKIA      | 17.46  | 6.28   | -2.78 | 0.009925 | 0.035739 |
| ENSOARG00000010493 | ATF3      | 72.98  | 189.65 | 2.6   | 0.009945 | 0.035767 |
| ENSOARG00000015236 | MAFF      | 34.46  | 140.8  | 4.09  | 0.009953 | 0.035767 |
| ENSOARG00000018747 | RAD21L1   | 8.75   | 1.01   | -8.66 | 0.009965 | 0.03577  |
| ENSOARG00000016885 | UBE2E3    | 22.57  | 14.68  | -1.54 | 0.009983 | 0.035803 |
| ENSOARG00000000588 | ACOT4     | 19.62  | 8.93   | -2.2  | 0.009991 | 0.035812 |
| ENSOARG00000009473 | APOC2     | 216.87 | 107.58 | -2.02 | 0.010046 | 0.035857 |
| ENSOARG00000017519 | ATF1      | 18.62  | 29.3   | 1.57  | 0.010035 | 0.035857 |
| ENSOARG00000018297 | CLCN6     | 8.29   | 15.94  | 1.92  | 0.01006  | 0.035857 |
| ENSOARG00000011855 | ITGB3     | 10.71  | 20.06  | 1.87  | 0.010068 | 0.035857 |
| ENSOARG00000019040 | MAPRE3    | 15.04  | 32.92  | 2.19  | 0.010076 | 0.035857 |
| ENSOARG00000005779 | PAQR7     | 77.87  | 16.33  | -4.77 | 0.010045 | 0.035857 |
| ENSOARG00000007565 | RBM14     | 53.19  | 30.03  | -1.77 | 0.010096 | 0.035857 |
| ENSOARG00000014861 | SH3GLB1   | 93.67  | 162.34 | 1.73  | 0.010093 | 0.035857 |
| ENSOARG00000000916 | TNFAIP8L3 | 26.71  | 56.43  | 2.11  | 0.010063 | 0.035857 |
| ENSOARG00000013849 | GGT1      | 28.03  | 18.23  | -1.54 | 0.010111 | 0.035875 |
| ENSOARG00000001299 | PDCD10    | 43.9   | 68.87  | 1.57  | 0.010121 | 0.035875 |
| ENSOARG00000011058 | PPP2R5B   | 15.24  | 9.56   | -1.59 | 0.010125 | 0.035875 |
| ENSOARG00000013556 | APRT      | 82.97  | 39.1   | -2.12 | 0.010152 | 0.035888 |
| ENSOARG00000019299 | DUT       | 59.36  | 32.38  | -1.83 | 0.01015  | 0.035888 |
| ENSOARG00000010478 | IGFL1     | 11.2   | 4.69   | -2.39 | 0.010151 | 0.035888 |
| ENSOARG00000003850 | FITM2     | 16.17  | 10.79  | -1.5  | 0.010173 | 0.035893 |
| ENSOARG00000001043 | GSTO1     | 20.93  | 8.68   | -2.41 | 0.010165 | 0.035893 |
| ENSOARG00000003233 | WSB2      | 206.45 | 362.77 | 1.76  | 0.010176 | 0.035893 |
| ENSOARG00000011504 | ZCCHC7    | 9.02   | 17.29  | 1.92  | 0.010173 | 0.035893 |
| ENSOARG00000012479 | BCL7B     | 43.29  | 81.68  | 1.89  | 0.010203 | 0.035956 |
| ENSOARG00000001837 | SPIRE1    | 8.56   | 30.39  | 3.55  | 0.010218 | 0.035956 |
| ENSOARG00000010930 | CDCP1     | 20.41  | 49.62  | 2.43  | 0.010254 | 0.035979 |
| ENSOARG00000014317 | DENND2B   | 69.98  | 123.23 | 1.76  | 0.010242 | 0.035979 |
| ENSOARG00000010523 | JAG1      | 28.08  | 59.15  | 2.11  | 0.010271 | 0.035979 |
| ENSOARG00000006792 | MLIP      | 7.73   | 15.96  | 2.06  | 0.010244 | 0.035979 |
| ENSOARG00000001039 | RAP1B     | 136.21 | 291.52 | 2.14  | 0.010258 | 0.035979 |
| ENSOARG00000011639 | YTHDF1    | 34.67  | 66.8   | 1.93  | 0.010285 | 0.03599  |
| ENSOARG00000000072 | FOSL1     | 49.52  | 95.05  | 1.92  | 0.010298 | 0.035993 |
| ENSOARG00000003786 | TRMT1L    | 25.09  | 14.79  | -1.7  | 0.010305 | 0.035999 |
| ENSOARG00000011554 | SLC30A1   | 29.18  | 46.86  | 1.61  | 0.010318 | 0.036009 |
| ENSOARG00000010926 | WDR4      | 11.47  | 6.27   | -1.83 | 0.010362 | 0.036115 |



|                    |              |        |        |       |          |          |
|--------------------|--------------|--------|--------|-------|----------|----------|
| ENSOARG00000012383 | POGLUT3      | 14.07  | 8.65   | -1.63 | 0.010377 | 0.03613  |
| ENSOARG00000010928 | SMG1         | 9.3    | 14.57  | 1.57  | 0.010378 | 0.03613  |
| ENSOARG00000007182 | C4BPB        | 23.71  | 5.17   | -4.59 | 0.01041  | 0.036163 |
| ENSOARG00000020648 | KLHL24       | 10.57  | 24.8   | 2.35  | 0.010417 | 0.036163 |
| ENSOARG00000019706 | NDRG2        | 136.3  | 54.65  | -2.49 | 0.010409 | 0.036163 |
| ENSOARG00000013920 | WDR81        | 21.18  | 13.8   | -1.53 | 0.010416 | 0.036163 |
| ENSOARG00000003259 | PON2         | 103.64 | 63.77  | -1.63 | 0.01045  | 0.036239 |
| ENSOARG00000000004 | -            | 4.52   | 10.79  | 2.39  | 0.010502 | 0.036339 |
| ENSOARG00000020567 | AGFG1        | 31.07  | 64.82  | 2.09  | 0.010516 | 0.036339 |
| ENSOARG00000016199 | UBE2A        | 32.4   | 49.97  | 1.54  | 0.010518 | 0.036339 |
| ENSOARG00000006042 | SAMD4B       | 51.96  | 125.27 | 2.41  | 0.010543 | 0.036375 |
| ENSOARG00000011135 | ATXN1L       | 28.79  | 43.91  | 1.53  | 0.010555 | 0.036399 |
| ENSOARG00000011707 | NOL9         | 13.06  | 8.06   | -1.62 | 0.01057  | 0.036428 |
| ENSOARG00000018750 | LARP6        | 13.76  | 23.27  | 1.69  | 0.010586 | 0.036461 |
| ENSOARG00000016418 | RAPGEF6      | 4.22   | 11.96  | 2.83  | 0.010591 | 0.036461 |
| ENSOARG00000002352 | SUDS3        | 34.93  | 56.08  | 1.61  | 0.010608 | 0.036499 |
| ENSOARG00000008713 | FBF1         | 10.77  | 5.53   | -1.95 | 0.010616 | 0.036507 |
| ENSOARG00000009058 | CREB5        | 20.9   | 122.98 | 5.88  | 0.01064  | 0.036568 |
| ENSOARG00000003792 | ANGPTL4      | 136.09 | 58.37  | -2.33 | 0.01066  | 0.036571 |
| ENSOARG00000014982 | ARL14        | 7.75   | 0.89   | -8.71 | 0.010668 | 0.036571 |
| ENSOARG00000015855 | DEGS1        | 110.05 | 270.37 | 2.46  | 0.010651 | 0.036571 |
| ENSOARG00000003145 | RANBP10      | 18.88  | 40.22  | 2.13  | 0.010664 | 0.036571 |
| ENSOARG00000020277 | C15orf62     | 7.3    | 1.94   | -3.76 | 0.010693 | 0.036599 |
| ENSOARG00000000420 | NDFIP2       | 144.09 | 558.01 | 3.87  | 0.010698 | 0.036599 |
| ENSOARG00000018854 | NDUFA6       | 121.99 | 67.55  | -1.81 | 0.010702 | 0.036599 |
| ENSOARG00000009519 | DAXX         | 92.74  | 49.91  | -1.86 | 0.010715 | 0.036622 |
| ENSOARG00000021125 | DHRS7        | 64.55  | 33.54  | -1.92 | 0.010727 | 0.036642 |
| ENSOARG00000005261 | GBGT1        | 48.97  | 23.75  | -2.06 | 0.010767 | 0.036679 |
| ENSOARG00000008162 | MAP4K3       | 47.04  | 83.62  | 1.78  | 0.010766 | 0.036679 |
| ENSOARG00000016814 | TXNRD1       | 123.06 | 220.76 | 1.79  | 0.010766 | 0.036679 |
| ENSOARG00000013777 | CBR1         | 10.26  | 3.88   | -2.64 | 0.010796 | 0.036686 |
| ENSOARG00000008677 | KAT6B        | 7.18   | 13.88  | 1.93  | 0.01082  | 0.036686 |
| ENSOARG00000014989 | TUBB3        | 28.15  | 12.86  | -2.19 | 0.010816 | 0.036686 |
| ENSOARG00000017689 | UBXN2A       | 26.87  | 47.24  | 1.76  | 0.010806 | 0.036686 |
| ENSOARG00000010650 | ALDH2        | 124.84 | 56.01  | -2.23 | 0.010887 | 0.036823 |
| ENSOARG00000003361 | LOC101114075 | 781.58 | 427.04 | -1.83 | 0.010885 | 0.036823 |
| ENSOARG00000007757 | RBM15B       | 48.18  | 74.28  | 1.54  | 0.010898 | 0.036842 |
| ENSOARG00000004660 | GRAMD1A      | 46.79  | 76.35  | 1.63  | 0.010927 | 0.036918 |
| ENSOARG00000005406 | HKDC1        | 33.98  | 9.08   | -3.74 | 0.010938 | 0.036935 |
| ENSOARG00000015536 | CEMIP        | 6.53   | 13.35  | 2.04  | 0.010974 | 0.036953 |
| ENSOARG00000000123 | CX3CL1       | 38.86  | 16.32  | -2.38 | 0.010979 | 0.036953 |
| ENSOARG00000010984 | PDE9A        | 5.46   | 15.39  | 2.82  | 0.010955 | 0.036953 |
| ENSOARG00000017682 | RTL5         | 127.45 | 19.67  | -6.48 | 0.010962 | 0.036953 |

|                     |          |        |        |       |          |          |
|---------------------|----------|--------|--------|-------|----------|----------|
| ENSOARG00000004208  | TCIM     | 59.91  | 216.38 | 3.61  | 0.010967 | 0.036953 |
| ENSOARG000000012886 | THRA     | 24.07  | 13.54  | -1.78 | 0.011005 | 0.037019 |
| ENSOARG000000018360 | CCDC174  | 16.57  | 41.09  | 2.48  | 0.011109 | 0.03721  |
| ENSOARG000000005780 | EMP2     | 50.39  | 31.96  | -1.58 | 0.011109 | 0.03721  |
| ENSOARG000000005122 | FAM120B  | 10.75  | 5.61   | -1.92 | 0.011093 | 0.03721  |
| ENSOARG000000002007 | SIGLEC1  | 32.11  | 11.83  | -2.71 | 0.011109 | 0.03721  |
| ENSOARG000000001836 | CAVIN1   | 237.03 | 134.82 | -1.76 | 0.011125 | 0.037214 |
| ENSOARG000000019198 | CCNT1    | 10.38  | 20.89  | 2.01  | 0.011135 | 0.037214 |
| ENSOARG000000013714 | CD34     | 17.34  | 9.68   | -1.79 | 0.011134 | 0.037214 |
| ENSOARG000000005264 | DDX50    | 15.62  | 23.81  | 1.52  | 0.011128 | 0.037214 |
| ENSOARG000000008950 | C9orf64  | 20.22  | 8.95   | -2.26 | 0.011165 | 0.037216 |
| ENSOARG000000006711 | DIO1     | 14.78  | 6.96   | -2.12 | 0.011166 | 0.037216 |
| ENSOARG000000017473 | HIGD1A   | 3.19   | 24.97  | 7.83  | 0.011162 | 0.037216 |
| ENSOARG000000011354 | KLHL21   | 25.74  | 61.04  | 2.37  | 0.011183 | 0.037216 |
| ENSOARG000000008213 | VEZF1    | 56.21  | 89.84  | 1.6   | 0.011166 | 0.037216 |
| ENSOARG000000019683 | WNT2B    | 25.84  | 56.45  | 2.18  | 0.011145 | 0.037216 |
| ENSOARG000000007905 | NPC1     | 27.56  | 53.56  | 1.94  | 0.011201 | 0.037254 |
| ENSOARG000000020416 | ATP13A3  | 46.7   | 88.18  | 1.89  | 0.011243 | 0.037345 |
| ENSOARG000000006376 | LY96     | 83.97  | 128.73 | 1.53  | 0.011242 | 0.037345 |
| ENSOARG000000016995 | CHMP2B   | 27.94  | 50.24  | 1.8   | 0.011259 | 0.037346 |
| ENSOARG000000011263 | DAPK3    | 165.26 | 329.22 | 1.99  | 0.011277 | 0.037346 |
| ENSOARG000000000117 | HERC3    | 23.66  | 36.45  | 1.54  | 0.011257 | 0.037346 |
| ENSOARG000000008757 | ISCA1    | 39.18  | 80.58  | 2.06  | 0.011274 | 0.037346 |
| ENSOARG000000015078 | IRF1     | 49.52  | 29.19  | -1.7  | 0.011291 | 0.037372 |
| ENSOARG000000016961 | ANKRD50  | 11.58  | 21.74  | 1.88  | 0.011332 | 0.037428 |
| ENSOARG000000013884 | DAP      | 692.36 | 414.12 | -1.67 | 0.011328 | 0.037428 |
| ENSOARG000000000470 | DCAF16   | 13.64  | 4.13   | -3.3  | 0.011318 | 0.037428 |
| ENSOARG000000020403 | LSG1     | 22.36  | 36.51  | 1.63  | 0.011324 | 0.037428 |
| ENSOARG000000006924 | CELF1    | 49.14  | 79.55  | 1.62  | 0.011361 | 0.037484 |
| ENSOARG000000006289 | PPWD1    | 16.65  | 8.86   | -1.88 | 0.011361 | 0.037484 |
| ENSOARG000000007614 | ACSL1    | 51.32  | 87.29  | 1.7   | 0.011379 | 0.037523 |
| ENSOARG000000008192 | FOXA1    | 34.81  | 14.51  | -2.4  | 0.011394 | 0.037528 |
| ENSOARG000000015896 | ISCA1    | 82.48  | 170.35 | 2.07  | 0.011405 | 0.037528 |
| ENSOARG000000021199 | SIPA1L1  | 17.54  | 9.25   | -1.9  | 0.011402 | 0.037528 |
| ENSOARG000000016550 | MLH1     | 12.36  | 6.03   | -2.05 | 0.01142  | 0.037556 |
| ENSOARG000000008099 | SAMD11   | 31.18  | 5.86   | -5.32 | 0.011447 | 0.037587 |
| ENSOARG000000001486 | GATAD2B  | 23.58  | 41.58  | 1.76  | 0.011477 | 0.037667 |
| ENSOARG000000006486 | SREK1IP1 | 12.48  | 5.69   | -2.19 | 0.011505 | 0.037737 |
| ENSOARG000000014199 | PLIN2    | 124.8  | 235.22 | 1.88  | 0.011515 | 0.037751 |
| ENSOARG000000001956 | SNX33    | 17.77  | 11.54  | -1.54 | 0.011524 | 0.037761 |
| ENSOARG000000012282 | -        | 17.94  | 29.61  | 1.65  | 0.011658 | 0.037766 |
| ENSOARG000000013560 | -        | 102.45 | 65.03  | -1.58 | 0.01163  | 0.037766 |
| ENSOARG000000013620 | ADGRL2   | 41.27  | 25.58  | -1.61 | 0.01159  | 0.037766 |

|                    |              |         |        |       |          |          |
|--------------------|--------------|---------|--------|-------|----------|----------|
| ENSOARG00000011841 | ANPEP        | 29.2    | 9.69   | -3.01 | 0.011634 | 0.037766 |
| ENSOARG00000016188 | BIN1         | 30.06   | 51.75  | 1.72  | 0.011673 | 0.037766 |
| ENSOARG00000018943 | CYBB         | 41.65   | 26.41  | -1.58 | 0.011613 | 0.037766 |
| ENSOARG00000017785 | FAM89A       | 49.19   | 10.15  | -4.85 | 0.011577 | 0.037766 |
| ENSOARG00000015192 | HACL1        | 44.11   | 12.21  | -3.61 | 0.011611 | 0.037766 |
| ENSOARG00000013211 | KANK1        | 47.55   | 27.02  | -1.76 | 0.01163  | 0.037766 |
| ENSOARG00000014296 | KLHDC8B      | 8.44    | 2.14   | -3.94 | 0.011582 | 0.037766 |
| ENSOARG00000007234 | PLK2         | 78.68   | 220.37 | 2.8   | 0.01167  | 0.037766 |
| ENSOARG00000007884 | PROZ         | 21.36   | 6.89   | -3.1  | 0.011569 | 0.037766 |
| ENSOARG00000014705 | SEPTIN8      | 29.32   | 18.02  | -1.63 | 0.011563 | 0.037766 |
| ENSOARG00000010035 | SERPING1     | 318.01  | 174.38 | -1.82 | 0.011627 | 0.037766 |
| ENSOARG00000016653 | SFXN1        | 95.59   | 48.12  | -1.99 | 0.011679 | 0.037766 |
| ENSOARG00000019699 | STK40        | 80.08   | 138.25 | 1.73  | 0.011641 | 0.037766 |
| ENSOARG00000007484 | WDSUB1       | 11.43   | 19.01  | 1.66  | 0.011582 | 0.037766 |
| ENSOARG00000015283 | WAC          | 89.72   | 135.18 | 1.51  | 0.011687 | 0.037774 |
| ENSOARG00000000971 | ANKRD12      | 18.43   | 34.99  | 1.9   | 0.01171  | 0.037814 |
| ENSOARG00000000576 | GSDMD        | 57.83   | 36.4   | -1.59 | 0.011718 | 0.037814 |
| ENSOARG00000011563 | RNF38        | 22.07   | 34.07  | 1.54  | 0.011713 | 0.037814 |
| ENSOARG00000009618 | EPC2         | 15.71   | 28.69  | 1.83  | 0.011749 | 0.037855 |
| ENSOARG00000018401 | FMNL3        | 43.23   | 90.98  | 2.1   | 0.01174  | 0.037855 |
| ENSOARG00000013108 | CHCHD10      | 44.58   | 82.28  | 1.85  | 0.011771 | 0.037906 |
| ENSOARG00000009901 | PRAG1        | 13.22   | 42.98  | 3.25  | 0.011783 | 0.037925 |
| ENSOARG00000016834 | ITPRID2      | 27.16   | 69.66  | 2.56  | 0.011849 | 0.037999 |
| ENSOARG00000009294 | MAGED1       | 202.37  | 84.19  | -2.4  | 0.01184  | 0.037999 |
| ENSOARG00000012679 | WBP1         | 29.57   | 13.84  | -2.14 | 0.011846 | 0.037999 |
| ENSOARG00000004070 | CALHM2       | 44.84   | 23.03  | -1.95 | 0.011884 | 0.038062 |
| ENSOARG00000004404 | SBNO1        | 13.45   | 21.52  | 1.6   | 0.011877 | 0.038062 |
| ENSOARG00000018732 | UACA         | 18.1    | 28.5   | 1.57  | 0.011962 | 0.038282 |
| ENSOARG00000005093 | ARHGEF2      | 59.27   | 120.79 | 2.04  | 0.011984 | 0.038307 |
| ENSOARG00000014894 | ASAP2        | 16.65   | 41.2   | 2.47  | 0.01199  | 0.038307 |
| ENSOARG00000017589 | DSTN         | 515.6   | 896.24 | 1.74  | 0.012007 | 0.038307 |
| ENSOARG00000004895 | RPS6KA2      | 9.92    | 17.52  | 1.77  | 0.012002 | 0.038307 |
| ENSOARG00000021738 | -            | 3126.41 | 869.49 | -3.6  | 0.012056 | 0.038406 |
| ENSOARG00000010442 | ALDH4A1      | 57.86   | 28.63  | -2.02 | 0.012103 | 0.038533 |
| ENSOARG00000010868 | TEX10        | 8.35    | 20.51  | 2.46  | 0.012116 | 0.038534 |
| ENSOARG00000013292 | GOLGA5       | 27.98   | 46.78  | 1.67  | 0.012129 | 0.038559 |
| ENSOARG00000010657 | LOC101120470 | 26.49   | 14.63  | -1.81 | 0.012145 | 0.038584 |
| ENSOARG00000010264 | PDLIM2       | 82.55   | 25.21  | -3.27 | 0.012155 | 0.038584 |
| ENSOARG00000020282 | RUBCN        | 7.77    | 13.84  | 1.78  | 0.012173 | 0.038617 |
| ENSOARG00000026720 | -            | 10.25   | 4.37   | -2.35 | 0.012187 | 0.038643 |
| ENSOARG00000004087 | URI1         | 25.06   | 62.34  | 2.49  | 0.012196 | 0.038652 |
| ENSOARG00000005170 | FBXW8        | 43.26   | 27.05  | -1.6  | 0.012208 | 0.038655 |
| ENSOARG00000015642 | CRTAP        | 53.98   | 29.13  | -1.85 | 0.012267 | 0.038686 |

|                    |          |        |        |       |          |          |
|--------------------|----------|--------|--------|-------|----------|----------|
| ENSOARG00000005915 | ECHDC2   | 11.61  | 3.33   | -3.49 | 0.012247 | 0.038686 |
| ENSOARG00000002391 | MSRB2    | 15.07  | 6.77   | -2.23 | 0.012259 | 0.038686 |
| ENSOARG00000017626 | PITX3    | 1.42   | 8.91   | 6.27  | 0.012281 | 0.038686 |
| ENSOARG00000019505 | PNKD     | 50.31  | 16.61  | -3.03 | 0.012228 | 0.038686 |
| ENSOARG00000006883 | VSIR     | 34.03  | 18.85  | -1.81 | 0.012288 | 0.038686 |
| ENSOARG00000005806 | MECP2    | 29.85  | 56.02  | 1.88  | 0.012308 | 0.03872  |
| ENSOARG00000008473 | PLAU     | 25.13  | 48.69  | 1.94  | 0.012328 | 0.038751 |
| ENSOARG00000014657 | ANKRD22  | 26.75  | 63.99  | 2.39  | 0.012354 | 0.038793 |
| ENSOARG00000012720 | IRF6     | 52.56  | 114.43 | 2.18  | 0.01238  | 0.038836 |
| ENSOARG00000002679 | PPP1R9A  | 13.96  | 6.32   | -2.21 | 0.012424 | 0.038954 |
| ENSOARG00000013572 | ERMP1    | 16.83  | 9.55   | -1.76 | 0.012456 | 0.039035 |
| ENSOARG00000005242 | GRPEL2   | 15.94  | 32.39  | 2.03  | 0.012477 | 0.039081 |
| ENSOARG00000010957 | AEN      | 18.05  | 50.34  | 2.79  | 0.012505 | 0.03911  |
| ENSOARG00000000340 | ELOB     | 228.11 | 149.07 | -1.53 | 0.012504 | 0.03911  |
| ENSOARG00000005080 | PRODH2   | 10.3   | 2.22   | -4.64 | 0.012512 | 0.039111 |
| ENSOARG00000016193 | IL18     | 10.76  | 16.61  | 1.54  | 0.012546 | 0.039197 |
| ENSOARG00000007048 | ANKRD10  | 23.89  | 12.34  | -1.94 | 0.012569 | 0.039227 |
| ENSOARG00000007716 | BPGM     | 43.36  | 176.78 | 4.08  | 0.012576 | 0.039227 |
| ENSOARG00000007696 | ECHDC1   | 30.76  | 20.08  | -1.53 | 0.012562 | 0.039227 |
| ENSOARG00000016751 | NCKAP1   | 64.87  | 129.7  | 2     | 0.012581 | 0.039227 |
| ENSOARG00000011509 | -        | 12.3   | 19.4   | 1.58  | 0.012618 | 0.039285 |
| ENSOARG00000007798 | NCK1     | 29.69  | 48.57  | 1.64  | 0.012631 | 0.039285 |
| ENSOARG00000018374 | NDUFA2   | 246.04 | 157.87 | -1.56 | 0.012607 | 0.039285 |
| ENSOARG00000017097 | PPTC7    | 11.6   | 22.48  | 1.94  | 0.012621 | 0.039285 |
| ENSOARG00000006863 | AGA      | 28.43  | 17.96  | -1.58 | 0.012651 | 0.039288 |
| ENSOARG00000020479 | RETSAT   | 17.78  | 7.47   | -2.38 | 0.01265  | 0.039288 |
| ENSOARG00000005626 | RHOQ     | 128.33 | 246.26 | 1.92  | 0.012639 | 0.039288 |
| ENSOARG00000000940 | ALDH6A1  | 62.81  | 18.46  | -3.4  | 0.012668 | 0.039292 |
| ENSOARG00000001326 | ATP6AP2  | 35.54  | 78.34  | 2.2   | 0.012717 | 0.039292 |
| ENSOARG00000012271 | C6orf136 | 17.66  | 29.64  | 1.68  | 0.012704 | 0.039292 |
| ENSOARG00000010640 | CALM3    | 238.58 | 121.56 | -1.96 | 0.01269  | 0.039292 |
| ENSOARG00000006023 | ERBIN    | 40.49  | 68.76  | 1.7   | 0.012743 | 0.039292 |
| ENSOARG00000007605 | FNBP4    | 34.8   | 52.09  | 1.5   | 0.012736 | 0.039292 |
| ENSOARG00000008027 | MYC      | 117.3  | 247.67 | 2.11  | 0.012718 | 0.039292 |
| ENSOARG00000006978 | RAB4B    | 12.59  | 22.03  | 1.75  | 0.012748 | 0.039292 |
| ENSOARG00000003520 | RNF170   | 45.57  | 26.36  | -1.73 | 0.012735 | 0.039292 |
| ENSOARG00000000569 | TNFAIP3  | 8.7    | 27.31  | 3.14  | 0.012723 | 0.039292 |
| ENSOARG00000002762 | TUBG2    | 17.1   | 9.05   | -1.89 | 0.012663 | 0.039292 |
| ENSOARG00000005061 | TXNL1    | 110.74 | 173.43 | 1.57  | 0.012725 | 0.039292 |
| ENSOARG00000000732 | XPC      | 47.43  | 20.49  | -2.31 | 0.01268  | 0.039292 |
| ENSOARG00000012169 | HAL      | 46.43  | 15.11  | -3.07 | 0.012755 | 0.039296 |
| ENSOARG00000018763 | UNC119   | 37.14  | 19.75  | -1.88 | 0.012768 | 0.039303 |
| ENSOARG00000011371 | ATXN7    | 10.73  | 17.03  | 1.59  | 0.012792 | 0.039336 |

|                    |              |        |         |       |          |          |
|--------------------|--------------|--------|---------|-------|----------|----------|
| ENSOARG00000009677 | CISD3        | 28.36  | 16.25   | -1.75 | 0.01291  | 0.039547 |
| ENSOARG00000006848 | NAXD         | 35.2   | 19.26   | -1.83 | 0.012908 | 0.039547 |
| ENSOARG00000005291 | CFI          | 287.88 | 130.71  | -2.2  | 0.012939 | 0.039548 |
| ENSOARG00000000729 | ITIH4        | 641.06 | 419.89  | -1.53 | 0.01294  | 0.039548 |
| ENSOARG00000013995 | EPM2AIP1     | 40.47  | 24.72   | -1.64 | 0.013001 | 0.039643 |
| ENSOARG00000000092 | SHISA5       | 53.21  | 29.67   | -1.79 | 0.012989 | 0.039643 |
| ENSOARG00000012574 | NMRK1        | 36.62  | 18.1    | -2.02 | 0.013028 | 0.039681 |
| ENSOARG00000006546 | ALDH5A1      | 38.11  | 18.76   | -2.03 | 0.013078 | 0.039754 |
| ENSOARG00000013390 | GIPC2        | 5.19   | 11.43   | 2.2   | 0.013075 | 0.039754 |
| ENSOARG00000014368 | DYRK1A       | 28.78  | 46.34   | 1.61  | 0.013099 | 0.039778 |
| ENSOARG00000005517 | ERICH1       | 10.81  | 21.36   | 1.98  | 0.013099 | 0.039778 |
| ENSOARG00000015818 | LMO7         | 25.93  | 16.43   | -1.58 | 0.013111 | 0.039778 |
| ENSOARG00000012928 | HSPA5        | 465.12 | 1054.37 | 2.27  | 0.013118 | 0.03978  |
| ENSOARG00000012097 | MSI1         | 7.55   | 26.13   | 3.46  | 0.013148 | 0.039849 |
| ENSOARG00000008121 | C8B          | 24.64  | 5.21    | -4.73 | 0.013208 | 0.039894 |
| ENSOARG00000002568 | NATD1        | 45.17  | 101.38  | 2.24  | 0.013196 | 0.039894 |
| ENSOARG00000010061 | PATZ1        | 15.99  | 8.76    | -1.83 | 0.013188 | 0.039894 |
| ENSOARG00000007055 | RFX1         | 9.67   | 21.29   | 2.2   | 0.013191 | 0.039894 |
| ENSOARG00000006838 | CFL2         | 59.72  | 107.82  | 1.81  | 0.013219 | 0.039904 |
| ENSOARG00000007250 | IBTK         | 30.56  | 70.59   | 2.31  | 0.013224 | 0.039904 |
| ENSOARG00000006997 | HMG3         | 208.21 | 70.88   | -2.94 | 0.013234 | 0.039915 |
| ENSOARG00000011947 | AFAP1        | 6.86   | 13.97   | 2.04  | 0.013385 | 0.03999  |
| ENSOARG00000015984 | ARIH2        | 45.64  | 70.67   | 1.55  | 0.013359 | 0.03999  |
| ENSOARG00000020113 | BMP2K        | 29.64  | 70.73   | 2.39  | 0.01331  | 0.03999  |
| ENSOARG00000005128 | CDK2AP1      | 67.31  | 38.56   | -1.75 | 0.013273 | 0.03999  |
| ENSOARG00000015965 | DNAJA2       | 120.32 | 224.73  | 1.87  | 0.013346 | 0.03999  |
| ENSOARG00000021021 | DUT          | 16.86  | 10.67   | -1.58 | 0.013324 | 0.03999  |
| ENSOARG00000020622 | EPS8         | 89.74  | 177.78  | 1.98  | 0.013388 | 0.03999  |
| ENSOARG00000007795 | F7           | 48.28  | 20.01   | -2.41 | 0.013345 | 0.03999  |
| ENSOARG00000011463 | IER3         | 278.65 | 736.86  | 2.64  | 0.013385 | 0.03999  |
| ENSOARG00000009637 | KIFC1        | 9.21   | 3.73    | -2.47 | 0.013323 | 0.03999  |
| ENSOARG00000011895 | MOSPD2       | 43.26  | 65.28   | 1.51  | 0.013334 | 0.03999  |
| ENSOARG00000009534 | MRPS31       | 27.67  | 47.6    | 1.72  | 0.013372 | 0.03999  |
| ENSOARG00000006160 | NSMCE4A      | 11.23  | 5.53    | -2.03 | 0.013362 | 0.03999  |
| ENSOARG00000007247 | TMEM106B     | 47.32  | 89.84   | 1.9   | 0.013363 | 0.03999  |
| ENSOARG00000011786 | MRPL28       | 52.06  | 33.57   | -1.55 | 0.013415 | 0.040011 |
| ENSOARG00000016659 | DCHS1        | 9.94   | 16.86   | 1.7   | 0.013452 | 0.040078 |
| ENSOARG00000004544 | VAT1         | 309.03 | 530.93  | 1.72  | 0.013463 | 0.040078 |
| ENSOARG00000017300 | FKBP7        | 26.35  | 15.58   | -1.69 | 0.013521 | 0.040138 |
| ENSOARG00000004345 | GTF2H5       | 163.43 | 104.27  | -1.57 | 0.013512 | 0.040138 |
| ENSOARG00000010864 | SPTLC3       | 9.43   | 19.56   | 2.07  | 0.013517 | 0.040138 |
| ENSOARG00000002819 | ALOX5        | 10.61  | 5.11    | -2.08 | 0.013561 | 0.040142 |
| ENSOARG00000010566 | LOC101115236 | 22.68  | 43.6    | 1.92  | 0.013571 | 0.040142 |

|                    |              |        |        |       |          |          |
|--------------------|--------------|--------|--------|-------|----------|----------|
| ENSOARG00000017075 | MTFR1        | 51.08  | 117.76 | 2.31  | 0.013582 | 0.040142 |
| ENSOARG00000020593 | PID1         | 31.54  | 91.06  | 2.89  | 0.013541 | 0.040142 |
| ENSOARG00000013044 | TJP2         | 49.62  | 107.3  | 2.16  | 0.013608 | 0.040186 |
| ENSOARG00000016081 | UPP1         | 28.09  | 15.55  | -1.81 | 0.013616 | 0.040186 |
| ENSOARG00000016510 | LOC101109643 | 11.9   | 4.67   | -2.55 | 0.01363  | 0.040196 |
| ENSOARG00000008034 | MAF          | 47.8   | 31.02  | -1.54 | 0.013635 | 0.040196 |
| ENSOARG00000003257 | LGALS3BP     | 118.15 | 48.7   | -2.43 | 0.013651 | 0.040212 |
| ENSOARG00000018288 | NCKAP5L      | 15.26  | 8.25   | -1.85 | 0.013658 | 0.040214 |
| ENSOARG00000004658 | C1S          | 83.7   | 42.57  | -1.97 | 0.013738 | 0.040405 |
| ENSOARG00000013373 | JMJD8        | 47.92  | 31.36  | -1.53 | 0.013752 | 0.040405 |
| ENSOARG00000012557 | TIRAP        | 18.55  | 9.3    | -1.99 | 0.013749 | 0.040405 |
| ENSOARG00000020816 | RORA         | 6.64   | 25.5   | 3.84  | 0.013775 | 0.040442 |
| ENSOARG00000001308 | PCDH1        | 152.9  | 81.77  | -1.87 | 0.013794 | 0.040478 |
| ENSOARG00000008361 | ARSD         | 12.09  | 6.77   | -1.79 | 0.013812 | 0.040494 |
| ENSOARG00000011184 | ZFP91        | 36.77  | 59.29  | 1.61  | 0.013811 | 0.040494 |
| ENSOARG00000005586 | PHYH         | 121.15 | 246.33 | 2.03  | 0.013833 | 0.040536 |
| ENSOARG00000001047 | ATP6V0E2     | 19.08  | 10.42  | -1.83 | 0.013849 | 0.040543 |
| ENSOARG00000017909 | CD59         | 426.23 | 241.13 | -1.77 | 0.013869 | 0.040553 |
| ENSOARG00000013168 | IFNGR2       | 133.06 | 87.33  | -1.52 | 0.013869 | 0.040553 |
| ENSOARG00000009938 | KYNU         | 57.66  | 36.82  | -1.57 | 0.013872 | 0.040553 |
| ENSOARG00000003372 | FLNC         | 63.7   | 225.49 | 3.54  | 0.013914 | 0.0406   |
| ENSOARG00000018551 | ANP32A       | 32.41  | 12.81  | -2.53 | 0.013984 | 0.040704 |
| ENSOARG00000020383 | BDH1         | 6.25   | 12.8   | 2.05  | 0.014009 | 0.040704 |
| ENSOARG00000014590 | CRYM         | 14.8   | 6.56   | -2.26 | 0.01399  | 0.040704 |
| ENSOARG00000000925 | EID1         | 132.26 | 64.67  | -2.05 | 0.013965 | 0.040704 |
| ENSOARG00000012914 | SMC5         | 13.34  | 25.33  | 1.9   | 0.013957 | 0.040704 |
| ENSOARG00000013765 | TCF7         | 10.54  | 27.81  | 2.64  | 0.014    | 0.040704 |
| ENSOARG00000013198 | UCHL1        | 134.56 | 64.92  | -2.07 | 0.014005 | 0.040704 |
| ENSOARG00000002647 | MAP4         | 271.12 | 439.73 | 1.62  | 0.014023 | 0.040706 |
| ENSOARG00000004783 | CMKLR1       | 16.99  | 7.64   | -2.22 | 0.01405  | 0.040707 |
| ENSOARG00000016514 | SP1          | 50.27  | 95.59  | 1.9   | 0.014042 | 0.040707 |
| ENSOARG00000010932 | ZC3H4        | 27.38  | 17.67  | -1.55 | 0.01405  | 0.040707 |
| ENSOARG00000018902 | ESPNL        | 7.72   | 1.45   | -5.32 | 0.014078 | 0.040733 |
| ENSOARG00000014904 | TENT4A       | 21.16  | 33.38  | 1.58  | 0.014076 | 0.040733 |
| ENSOARG00000012181 | TLK2         | 15.16  | 26.59  | 1.75  | 0.014068 | 0.040733 |
| ENSOARG00000014334 | CDK10        | 26.17  | 15.76  | -1.66 | 0.014093 | 0.040757 |
| ENSOARG00000019116 | CIDEB        | 189.39 | 68.34  | -2.77 | 0.014158 | 0.040781 |
| ENSOARG00000005118 | KCNK12       | 37.05  | 108.58 | 2.93  | 0.014147 | 0.040781 |
| ENSOARG00000008808 | MPZL2        | 5.21   | 21.44  | 4.12  | 0.014157 | 0.040781 |
| ENSOARG00000015431 | ODC1         | 86.56  | 158.85 | 1.84  | 0.014109 | 0.040781 |
| ENSOARG00000002725 | PLAAT3       | 11.03  | 2.54   | -4.34 | 0.014139 | 0.040781 |
| ENSOARG00000004826 | SIRT1        | 13.21  | 26.93  | 2.04  | 0.014174 | 0.040781 |
| ENSOARG00000015331 | CSNK1E       | 49.84  | 78.16  | 1.57  | 0.014192 | 0.040811 |

|                    |            |        |        |       |          |          |
|--------------------|------------|--------|--------|-------|----------|----------|
| ENSOARG00000003489 | GGPS1      | 10     | 17.57  | 1.76  | 0.014198 | 0.040811 |
| ENSOARG00000004438 | EZR        | 116.21 | 242.57 | 2.09  | 0.014248 | 0.040861 |
| ENSOARG00000009242 | GABRB3     | 6.72   | 12.6   | 1.87  | 0.014248 | 0.040861 |
| ENSOARG00000005557 | PLSCR1     | 42.29  | 24.13  | -1.75 | 0.014236 | 0.040861 |
| ENSOARG00000006068 | ZFP36      | 97.36  | 253.3  | 2.6   | 0.014233 | 0.040861 |
| ENSOARG00000012403 | FAM207A    | 13.74  | 8.66   | -1.59 | 0.014276 | 0.040921 |
| ENSOARG00000010272 | DUSP4      | 10.93  | 48.68  | 4.45  | 0.014301 | 0.040976 |
| ENSOARG00000009334 | UBAP1      | 110.42 | 269.98 | 2.45  | 0.014309 | 0.040978 |
| ENSOARG00000007712 | SLC5A3     | 12.68  | 38.43  | 3.03  | 0.014347 | 0.041068 |
| ENSOARG00000004295 | ATP9B      | 18.73  | 10.47  | -1.79 | 0.014373 | 0.041086 |
| ENSOARG00000006078 | COL27A1    | 33.62  | 64.75  | 1.93  | 0.01436  | 0.041086 |
| ENSOARG00000003947 | CSGALNACT2 | 11.73  | 20.98  | 1.79  | 0.014372 | 0.041086 |
| ENSOARG00000016053 | -          | 98.26  | 179.68 | 1.83  | 0.014412 | 0.041096 |
| ENSOARG00000017259 | ABHD8      | 11.19  | 5.04   | -2.22 | 0.014453 | 0.041096 |
| ENSOARG00000003544 | COG8       | 26.17  | 15.59  | -1.68 | 0.014398 | 0.041096 |
| ENSOARG00000016804 | FBXW4      | 10.75  | 17.78  | 1.65  | 0.014428 | 0.041096 |
| ENSOARG00000018463 | KIF3C      | 9.1    | 17.02  | 1.87  | 0.014427 | 0.041096 |
| ENSOARG00000010144 | KLF3       | 43.54  | 70.72  | 1.62  | 0.01443  | 0.041096 |
| ENSOARG00000008643 | MPZL3      | 14.36  | 26.2   | 1.82  | 0.014388 | 0.041096 |
| ENSOARG00000016229 | NEMP2      | 10.63  | 16.44  | 1.55  | 0.014403 | 0.041096 |
| ENSOARG00000013017 | SUZ12      | 16.1   | 32.75  | 2.03  | 0.014456 | 0.041096 |
| ENSOARG00000018215 | UPRT       | 22.71  | 37.67  | 1.66  | 0.014447 | 0.041096 |
| ENSOARG00000006465 | -          | 97.26  | 204.49 | 2.1   | 0.014482 | 0.04113  |
| ENSOARG00000008573 | NNT        | 44.76  | 25.27  | -1.77 | 0.014478 | 0.04113  |
| ENSOARG00000018388 | BBS2       | 17.76  | 50.3   | 2.83  | 0.014509 | 0.04115  |
| ENSOARG00000000315 | POLR3F     | 11.24  | 20.36  | 1.81  | 0.014496 | 0.04115  |
| ENSOARG00000016176 | CHD7       | 7.86   | 18.53  | 2.36  | 0.014519 | 0.04116  |
| ENSOARG00000004700 | HEXB       | 41.33  | 95.13  | 2.3   | 0.014529 | 0.04117  |
| ENSOARG00000013998 | WIPF2      | 31.92  | 86.88  | 2.72  | 0.014565 | 0.041254 |
| ENSOARG00000011675 | CD2AP      | 55.49  | 118.78 | 2.14  | 0.014586 | 0.041285 |
| ENSOARG00000002939 | RCC1       | 11.52  | 6.18   | -1.86 | 0.014626 | 0.04135  |
| ENSOARG00000007810 | ANKRD16    | 10.96  | 4.86   | -2.26 | 0.014641 | 0.041365 |
| ENSOARG00000017227 | APPL2      | 18.27  | 9.12   | -2    | 0.014672 | 0.041422 |
| ENSOARG00000010744 | UHMK1      | 31.85  | 54.05  | 1.7   | 0.014717 | 0.041495 |
| ENSOARG00000003506 | ATP6V1F    | 243.32 | 415.37 | 1.71  | 0.014752 | 0.041524 |
| ENSOARG00000000142 | HSPA8      | 292.84 | 443.02 | 1.51  | 0.014783 | 0.041524 |
| ENSOARG00000016613 | TVP23C     | 51.08  | 85.66  | 1.68  | 0.014772 | 0.041524 |
| ENSOARG00000004687 | XYLT2      | 22.52  | 9.4    | -2.4  | 0.014783 | 0.041524 |
| ENSOARG00000003640 | BRD4       | 49.08  | 86.21  | 1.76  | 0.014827 | 0.041599 |
| ENSOARG00000019544 | PPP1CB     | 93.96  | 140.54 | 1.5   | 0.014828 | 0.041599 |
| ENSOARG00000009512 | PPME1      | 29.52  | 16.83  | -1.75 | 0.014836 | 0.041602 |
| ENSOARG00000008818 | HSD17B8    | 27.51  | 17.18  | -1.6  | 0.014872 | 0.041645 |
| ENSOARG00000012491 | CRYZ       | 55.34  | 26.04  | -2.13 | 0.014916 | 0.041694 |

|                    |            |        |        |       |          |          |
|--------------------|------------|--------|--------|-------|----------|----------|
| ENSOARG00000020165 | ZHX2       | 14.34  | 40.83  | 2.85  | 0.01491  | 0.041694 |
| ENSOARG00000011634 | SPR        | 41     | 24.59  | -1.67 | 0.014926 | 0.041703 |
| ENSOARG00000015776 | C21orf91   | 14.99  | 31.5   | 2.1   | 0.014966 | 0.041757 |
| ENSOARG00000012400 | EPHA2      | 60.78  | 123.69 | 2.04  | 0.015014 | 0.041759 |
| ENSOARG00000016991 | HSPB2      | 53.02  | 94.56  | 1.78  | 0.015011 | 0.041759 |
| ENSOARG00000003620 | KCP        | 7.26   | 1.4    | -5.19 | 0.014995 | 0.041759 |
| ENSOARG00000001261 | SPAG1      | 9.44   | 19.63  | 2.08  | 0.014987 | 0.041759 |
| ENSOARG00000018528 | TGM2       | 42.72  | 118.09 | 2.76  | 0.01501  | 0.041759 |
| ENSOARG00000003896 | LAMTOR1    | 103.8  | 159.25 | 1.53  | 0.015031 | 0.041787 |
| ENSOARG00000001906 | BUD13      | 16.03  | 31     | 1.93  | 0.01505  | 0.041822 |
| ENSOARG00000008122 | CMC2       | 32.37  | 16.59  | -1.95 | 0.015118 | 0.041953 |
| ENSOARG00000012909 | HK2        | 7.14   | 33.54  | 4.7   | 0.01512  | 0.041953 |
| ENSOARG00000003629 | LGALS8     | 38.79  | 25.88  | -1.5  | 0.015124 | 0.041953 |
| ENSOARG00000005848 | ECH1       | 15.38  | 9.32   | -1.65 | 0.015173 | 0.041956 |
| ENSOARG00000014103 | NOCT       | 28.76  | 46.37  | 1.61  | 0.015167 | 0.041956 |
| ENSOARG00000006053 | PAF1       | 66.84  | 106.35 | 1.59  | 0.015147 | 0.041956 |
| ENSOARG00000021060 | RORC       | 31.54  | 11.27  | -2.8  | 0.015142 | 0.041956 |
| ENSOARG00000004279 | SLC7A9     | 15.73  | 2.73   | -5.76 | 0.01516  | 0.041956 |
| ENSOARG00000012477 | ZNF143     | 12.47  | 29.66  | 2.38  | 0.015173 | 0.041956 |
| ENSOARG00000002903 | AC078927.1 | 259.32 | 432.02 | 1.67  | 0.015189 | 0.041976 |
| ENSOARG00000006415 | SFR1       | 10.11  | 21.71  | 2.15  | 0.015238 | 0.04208  |
| ENSOARG00000001013 | RNF19A     | 49.77  | 78.05  | 1.57  | 0.015249 | 0.042083 |
| ENSOARG00000011183 | CEBPG      | 73.93  | 191.37 | 2.59  | 0.015299 | 0.042149 |
| ENSOARG00000000832 | MGAT2      | 65.88  | 41.02  | -1.61 | 0.015315 | 0.042149 |
| ENSOARG00000016178 | NREP       | 89.64  | 35.34  | -2.54 | 0.015313 | 0.042149 |
| ENSOARG00000010858 | VGF        | 228.56 | 599.13 | 2.62  | 0.015306 | 0.042149 |
| ENSOARG00000017667 | FKBP10     | 39.52  | 20.28  | -1.95 | 0.015335 | 0.042156 |
| ENSOARG00000007280 | SEC14L2    | 13.29  | 7.96   | -1.67 | 0.015341 | 0.042156 |
| ENSOARG00000016244 | NCKIPSD    | 9.58   | 15.32  | 1.6   | 0.015375 | 0.042195 |
| ENSOARG00000005341 | MRM2       | 16.08  | 10.02  | -1.6  | 0.015396 | 0.042215 |
| ENSOARG00000004352 | SIAH2      | 46.57  | 79.89  | 1.72  | 0.015404 | 0.042218 |
| ENSOARG00000012663 | STK26      | 7.99   | 14.81  | 1.85  | 0.015411 | 0.042218 |
| ENSOARG00000014802 | ARHGEF3    | 4.42   | 11.91  | 2.69  | 0.015459 | 0.042257 |
| ENSOARG00000020580 | CHRD       | 12.5   | 5.81   | -2.15 | 0.015462 | 0.042257 |
| ENSOARG00000004241 | SMO        | 47.12  | 28.22  | -1.67 | 0.015466 | 0.042257 |
| ENSOARG00000010825 | AUTS2      | 22.57  | 36.96  | 1.64  | 0.015519 | 0.042272 |
| ENSOARG00000004489 | EGR2       | 6.11   | 12.46  | 2.04  | 0.0155   | 0.042272 |
| ENSOARG00000010628 | PACC1      | 19.43  | 34.57  | 1.78  | 0.015492 | 0.042272 |
| ENSOARG00000015307 | PANK1      | 13.39  | 6.34   | -2.11 | 0.015511 | 0.042272 |
| ENSOARG00000001513 | SLC26A11   | 12.92  | 4.98   | -2.59 | 0.015481 | 0.042272 |
| ENSOARG00000008508 | ZBTB10     | 7.41   | 14.7   | 1.98  | 0.015542 | 0.042313 |
| ENSOARG00000009200 | SLC2A10    | 11.46  | 4.07   | -2.82 | 0.015549 | 0.042316 |
| ENSOARG00000004417 | C4orf46    | 13.18  | 6.97   | -1.89 | 0.015565 | 0.042339 |



|                     |         |        |        |       |          |          |
|---------------------|---------|--------|--------|-------|----------|----------|
| ENSOARG00000008601  | -       | 18.45  | 4.77   | -3.87 | 0.015599 | 0.04235  |
| ENSOARG00000002144  | LDLRAD4 | 15.98  | 7.84   | -2.04 | 0.01561  | 0.04235  |
| ENSOARG00000000757  | MYNN    | 14.11  | 29.47  | 2.09  | 0.015591 | 0.04235  |
| ENSOARG000000006673 | MYO6    | 9.39   | 14.7   | 1.57  | 0.015632 | 0.042391 |
| ENSOARG00000002954  | KAT6A   | 14.57  | 23.26  | 1.6   | 0.015707 | 0.042503 |
| ENSOARG000000012748 | GPNMB   | 82.54  | 185.04 | 2.24  | 0.015749 | 0.042527 |
| ENSOARG000000006114 | KIF12   | 81.96  | 37.27  | -2.2  | 0.015735 | 0.042527 |
| ENSOARG000000009470 | RNASEK  | 396.83 | 696.71 | 1.76  | 0.01573  | 0.042527 |
| ENSOARG000000003846 | SLC5A9  | 8.72   | 1.04   | -8.38 | 0.015751 | 0.042527 |
| ENSOARG000000015004 | TASOR   | 20.47  | 12.28  | -1.67 | 0.015745 | 0.042527 |
| ENSOARG000000017824 | TP53I3  | 11.23  | 5.59   | -2.01 | 0.015778 | 0.042565 |
| ENSOARG000000013207 | RCN3    | 39.9   | 24.19  | -1.65 | 0.015811 | 0.042633 |
| ENSOARG000000007720 | PLPP1   | 153.33 | 97.35  | -1.58 | 0.01583  | 0.042666 |
| ENSOARG000000000935 | ABCC4   | 17.57  | 27.07  | 1.54  | 0.015853 | 0.042673 |
| ENSOARG000000009687 | SLC39A5 | 43.86  | 19.99  | -2.19 | 0.015853 | 0.042673 |
| ENSOARG000000017752 | AMIGO2  | 50.1   | 179.08 | 3.57  | 0.01587  | 0.042681 |
| ENSOARG000000009667 | ARMC6   | 18.95  | 9.85   | -1.92 | 0.015909 | 0.042713 |
| ENSOARG000000011122 | CLEC3B  | 43.34  | 26.02  | -1.67 | 0.015937 | 0.042713 |
| ENSOARG000000010315 | DUSP12  | 14.13  | 24.92  | 1.76  | 0.015925 | 0.042713 |
| ENSOARG000000010177 | MED30   | 21.8   | 34     | 1.56  | 0.01589  | 0.042713 |
| ENSOARG000000020754 | OTUD7B  | 20.67  | 41.96  | 2.03  | 0.015937 | 0.042713 |
| ENSOARG000000012100 | SLC46A3 | 33.45  | 15.93  | -2.1  | 0.0159   | 0.042713 |
| ENSOARG000000017615 | TOX3    | 39.27  | 124.51 | 3.17  | 0.015926 | 0.042713 |
| ENSOARG000000015891 | FAM168B | 77.4   | 126.94 | 1.64  | 0.015954 | 0.04274  |
| ENSOARG000000020682 | TTC14   | 29.2   | 16.75  | -1.74 | 0.01599  | 0.042799 |
| ENSOARG000000017789 | SNTB1   | 46.23  | 22.99  | -2.01 | 0.016    | 0.042808 |
| ENSOARG000000011418 | AMIGO1  | 12.93  | 4.05   | -3.19 | 0.016018 | 0.042819 |
| ENSOARG000000008648 | MTMR2   | 28.98  | 68.23  | 2.35  | 0.016014 | 0.042819 |
| ENSOARG000000014033 | ASPDH   | 9.3    | 2.28   | -4.08 | 0.016035 | 0.042844 |
| ENSOARG000000002455 | FAAH    | 27.22  | 16.98  | -1.6  | 0.016049 | 0.042866 |
| ENSOARG000000005065 | ACAP3   | 12.7   | 7.3    | -1.74 | 0.016071 | 0.042874 |
| ENSOARG000000007567 | TTC39C  | 13.03  | 22.18  | 1.7   | 0.016101 | 0.042874 |
| ENSOARG000000002941 | ULBP3   | 43.98  | 92.01  | 2.09  | 0.016076 | 0.042874 |
| ENSOARG000000012603 | RASL11A | 39.38  | 10.02  | -3.93 | 0.016127 | 0.042925 |
| ENSOARG000000007682 | HAUS7   | 22.55  | 45.23  | 2.01  | 0.016176 | 0.042991 |
| ENSOARG000000014807 | MTPAP   | 16.07  | 24.87  | 1.55  | 0.01618  | 0.042991 |
| ENSOARG000000015319 | KLF11   | 19.32  | 36.46  | 1.89  | 0.016203 | 0.043015 |
| ENSOARG000000014653 | NFS1    | 19.15  | 10.83  | -1.77 | 0.016263 | 0.043138 |
| ENSOARG000000012390 | MYLIP   | 8.91   | 31.17  | 3.5   | 0.01638  | 0.043393 |
| ENSOARG000000013481 | SLC39A4 | 17.01  | 9.39   | -1.81 | 0.016436 | 0.043503 |
| ENSOARG000000003338 | HNF1B   | 11.16  | 6.12   | -1.82 | 0.01651  | 0.043606 |
| ENSOARG000000018986 | RRP7A   | 23.45  | 11.7   | -2    | 0.016503 | 0.043606 |
| ENSOARG000000020876 | ZNF280D | 8.22   | 15.53  | 1.89  | 0.016539 | 0.043628 |

|                     |          |        |         |       |          |          |
|---------------------|----------|--------|---------|-------|----------|----------|
| ENSOARG00000000944  | TRIM21   | 14.54  | 7.09    | -2.05 | 0.016613 | 0.043767 |
| ENSOARG00000004709  | FXD1     | 93.21  | 51.78   | -1.8  | 0.016631 | 0.043792 |
| ENSOARG00000005098  | ST3GAL2  | 32.61  | 12.09   | -2.7  | 0.016637 | 0.043792 |
| ENSOARG00000004523  | SOD2     | 841.91 | 1800.43 | 2.14  | 0.016651 | 0.04381  |
| ENSOARG00000003685  | SLC4A11  | 37.05  | 17.22   | -2.15 | 0.016667 | 0.043813 |
| ENSOARG000000011732 | SLC30A10 | 10.42  | 3.37    | -3.09 | 0.016701 | 0.043867 |
| ENSOARG00000006539  | SAMD1    | 24.35  | 12.81   | -1.9  | 0.016722 | 0.043885 |
| ENSOARG00000009644  | NHLRC3   | 32.88  | 18.5    | -1.78 | 0.016735 | 0.043901 |
| ENSOARG000000019625 | RAB2B    | 30.14  | 46.68   | 1.55  | 0.016742 | 0.043901 |
| ENSOARG000000020781 | RPIA     | 25.04  | 45.69   | 1.82  | 0.016759 | 0.043926 |
| ENSOARG000000015161 | RAP2B    | 106.39 | 261.04  | 2.45  | 0.016782 | 0.043949 |
| ENSOARG000000010526 | C2CD2    | 10.14  | 16.73   | 1.65  | 0.016797 | 0.043968 |
| ENSOARG000000015898 | ROCK2    | 45.59  | 86.26   | 1.89  | 0.016819 | 0.043973 |
| ENSOARG000000001863 | SEMA6A   | 8.33   | 25.69   | 3.08  | 0.01682  | 0.043973 |
| ENSOARG00000006286  | SGPL1    | 102.71 | 168.44  | 1.64  | 0.016816 | 0.043973 |
| ENSOARG000000015417 | MAPRE1   | 18.62  | 31.18   | 1.67  | 0.016868 | 0.044044 |
| ENSOARG000000017460 | RAC3     | 28.13  | 17.2    | -1.64 | 0.016861 | 0.044044 |
| ENSOARG000000017816 | CRY1     | 9.3    | 28.09   | 3.02  | 0.016886 | 0.044059 |
| ENSOARG000000013134 | MTARC2   | 168.48 | 92.89   | -1.81 | 0.016888 | 0.044059 |
| ENSOARG000000006185 | ABHD16A  | 48.19  | 29.96   | -1.61 | 0.016914 | 0.044088 |
| ENSOARG00000000674  | S100A2   | 851.87 | 1716.3  | 2.01  | 0.016954 | 0.044137 |
| ENSOARG000000018649 | ABT1     | 26.84  | 41.83   | 1.56  | 0.016966 | 0.04415  |
| ENSOARG00000004252  | ILVBL    | 96.14  | 152.97  | 1.59  | 0.017005 | 0.044197 |
| ENSOARG000000009170 | RMDN2    | 16.18  | 10.29   | -1.57 | 0.016994 | 0.044197 |
| ENSOARG000000020631 | ABCC5    | 17.85  | 48.36   | 2.71  | 0.017021 | 0.044218 |
| ENSOARG000000011869 | AMACR    | 90.87  | 60.1    | -1.51 | 0.017041 | 0.044235 |
| ENSOARG000000017414 | DNAJC2   | 9.97   | 15.17   | 1.52  | 0.017049 | 0.044235 |
| ENSOARG000000013136 | PITRM1   | 28.08  | 51.47   | 1.83  | 0.017085 | 0.044292 |
| ENSOARG000000014988 | AHNAK    | 60.4   | 32.37   | -1.87 | 0.017147 | 0.044326 |
| ENSOARG000000009034 | BET1L    | 29.81  | 15.91   | -1.87 | 0.017144 | 0.044326 |
| ENSOARG000000016528 | BTAF1    | 11.29  | 19.19   | 1.7   | 0.017162 | 0.044326 |
| ENSOARG000000016913 | NPEPL1   | 15.96  | 8.51    | -1.88 | 0.017134 | 0.044326 |
| ENSOARG000000012078 | REEP6    | 14.04  | 7.52    | -1.87 | 0.017139 | 0.044326 |
| ENSOARG000000016855 | SLC23A2  | 15.56  | 28.06   | 1.8   | 0.01717  | 0.044326 |
| ENSOARG000000000378 | TCEAL8   | 179.73 | 82.5    | -2.18 | 0.017186 | 0.04435  |
| ENSOARG000000012776 | APLNR    | 22.99  | 5.82    | -3.95 | 0.017227 | 0.04442  |
| ENSOARG000000009365 | COMMD7   | 48.97  | 24.78   | -1.98 | 0.017235 | 0.04442  |
| ENSOARG000000026123 | -        | 20.9   | 9.14    | -2.29 | 0.017267 | 0.04447  |
| ENSOARG000000007803 | C21orf62 | 35.27  | 11.03   | -3.2  | 0.017276 | 0.04447  |
| ENSOARG000000012463 | GYS1     | 10.14  | 22.7    | 2.24  | 0.017275 | 0.04447  |
| ENSOARG000000004677 | SCN1B    | 71.68  | 32.63   | -2.2  | 0.017315 | 0.044553 |
| ENSOARG000000016847 | COG7     | 14.46  | 8.96    | -1.61 | 0.017366 | 0.044636 |
| ENSOARG000000012366 | MFSD12   | 57.7   | 121.69  | 2.11  | 0.017369 | 0.044636 |

|                    |          |        |         |       |          |          |
|--------------------|----------|--------|---------|-------|----------|----------|
| ENSOARG00000012096 | SUV39H1  | 15.63  | 9.19    | -1.7  | 0.017379 | 0.044643 |
| ENSOARG00000014053 | BTBD1    | 39.87  | 92.55   | 2.32  | 0.01739  | 0.044652 |
| ENSOARG00000013718 | ERLIN1   | 18.72  | 12.29   | -1.52 | 0.017425 | 0.044704 |
| ENSOARG00000010948 | DERL1    | 60.68  | 94.6    | 1.56  | 0.017441 | 0.044715 |
| ENSOARG00000015829 | PTPN18   | 14.07  | 8.88    | -1.58 | 0.017445 | 0.044715 |
| ENSOARG00000001691 | TMEM176B | 130.62 | 69.71   | -1.87 | 0.01748  | 0.044759 |
| ENSOARG00000014101 | MCOLN3   | 2.03   | 7.93    | 3.91  | 0.017512 | 0.044816 |
| ENSOARG00000025181 | SLC35A4  | 34.68  | 22.49   | -1.54 | 0.017547 | 0.044888 |
| ENSOARG00000004194 | TIAM2    | 3.67   | 11.42   | 3.11  | 0.017637 | 0.045024 |
| ENSOARG00000014923 | B3GALNT1 | 4.14   | 10.47   | 2.53  | 0.017649 | 0.045035 |
| ENSOARG00000014623 | TCF21    | 21.17  | 11.64   | -1.82 | 0.017656 | 0.045035 |
| ENSOARG00000010190 | TCF19    | 9.97   | 4.51    | -2.21 | 0.017746 | 0.045211 |
| ENSOARG00000011436 | MGAT5    | 10.21  | 16.2    | 1.59  | 0.017777 | 0.045219 |
| ENSOARG00000003976 | SH2D4A   | 22.79  | 14.8    | -1.54 | 0.017775 | 0.045219 |
| ENSOARG00000003559 | ABCC3    | 14.05  | 31.44   | 2.24  | 0.017796 | 0.045243 |
| ENSOARG00000008337 | CAMK2G   | 16.83  | 9.35    | -1.8  | 0.017831 | 0.045284 |
| ENSOARG00000010496 | OSBPL3   | 9.79   | 24.73   | 2.53  | 0.017834 | 0.045284 |
| ENSOARG00000011149 | CRYBG1   | 15.08  | 6.14    | -2.46 | 0.017861 | 0.045336 |
| ENSOARG00000002260 | MDFI     | 66.38  | 26.86   | -2.47 | 0.017891 | 0.045391 |
| ENSOARG00000014953 | EREG     | 7.29   | 27.28   | 3.74  | 0.017911 | 0.0454   |
| ENSOARG00000010414 | GHITM    | 67.32  | 109.17  | 1.62  | 0.017904 | 0.0454   |
| ENSOARG00000017129 | ZBED5    | 11.02  | 3.9     | -2.83 | 0.017944 | 0.045453 |
| ENSOARG00000008856 | FBXO33   | 22.6   | 14.45   | -1.56 | 0.017997 | 0.045549 |
| ENSOARG00000011846 | NTN4     | 61.42  | 115.2   | 1.88  | 0.018005 | 0.045549 |
| ENSOARG00000008022 | SORBS2   | 46.06  | 26.83   | -1.72 | 0.018021 | 0.045573 |
| ENSOARG00000000536 | AGPAT1   | 15.54  | 9.81    | -1.58 | 0.01807  | 0.045583 |
| ENSOARG00000004173 | GLYR1    | 45.3   | 29.35   | -1.54 | 0.018056 | 0.045583 |
| ENSOARG00000017427 | LDB1     | 31.39  | 20.99   | -1.5  | 0.018044 | 0.045583 |
| ENSOARG00000013452 | MITD1    | 23.26  | 12.67   | -1.84 | 0.018059 | 0.045583 |
| ENSOARG00000016775 | ATF4     | 810.28 | 1964.12 | 2.42  | 0.018096 | 0.045595 |
| ENSOARG00000009421 | ENOSF1   | 23.28  | 12.06   | -1.93 | 0.018085 | 0.045595 |
| ENSOARG00000018137 | TIMM10B  | 74.67  | 154.91  | 2.07  | 0.01812  | 0.045636 |
| ENSOARG00000002923 | TIPARP   | 20.97  | 57.43   | 2.74  | 0.018152 | 0.04568  |
| ENSOARG00000000328 | TCEAL9   | 49.39  | 25.74   | -1.92 | 0.018207 | 0.045782 |
| ENSOARG00000004931 | RAB3B    | 2.3    | 10.21   | 4.44  | 0.018225 | 0.045783 |
| ENSOARG00000014772 | ADD1     | 32.41  | 19.83   | -1.63 | 0.018239 | 0.045786 |
| ENSOARG00000002512 | COMMD4   | 41.02  | 24.73   | -1.66 | 0.018254 | 0.045786 |
| ENSOARG00000026365 | -        | 15.27  | 8.59    | -1.78 | 0.018285 | 0.045811 |
| ENSOARG00000009992 | AKR7L    | 14.09  | 6.96    | -2.02 | 0.018274 | 0.045811 |
| ENSOARG00000004239 | CPEB4    | 13.15  | 29.39   | 2.23  | 0.018286 | 0.045811 |
| ENSOARG00000025779 | -        | 1.64   | 13.1    | 7.99  | 0.018325 | 0.045853 |
| ENSOARG00000019208 | C1QTNF6  | 14.65  | 6.75    | -2.17 | 0.018317 | 0.045853 |
| ENSOARG00000003012 | PLEKHG1  | 18.35  | 28.04   | 1.53  | 0.018319 | 0.045853 |

|                    |         |         |        |       |          |          |
|--------------------|---------|---------|--------|-------|----------|----------|
| ENSOARG00000005409 | DHX8    | 25.92   | 45.62  | 1.76  | 0.018347 | 0.04587  |
| ENSOARG00000013190 | MAP4K4  | 66.44   | 109.34 | 1.65  | 0.018345 | 0.04587  |
| ENSOARG00000013819 | GRB10   | 27.4    | 42.44  | 1.55  | 0.018368 | 0.045887 |
| ENSOARG00000017588 | -       | 3.53    | 9.42   | 2.67  | 0.01845  | 0.045968 |
| ENSOARG00000010799 | FBXL20  | 12.26   | 19.91  | 1.62  | 0.018453 | 0.045968 |
| ENSOARG00000004859 | HOPX    | 112.13  | 207.14 | 1.85  | 0.018432 | 0.045968 |
| ENSOARG00000012925 | KLF6    | 75.31   | 113.77 | 1.51  | 0.018441 | 0.045968 |
| ENSOARG00000003115 | GALNT2  | 67.78   | 45.18  | -1.5  | 0.018526 | 0.046078 |
| ENSOARG00000013501 | STK38   | 25.38   | 50.74  | 2     | 0.018546 | 0.046089 |
| ENSOARG00000006382 | UNC5B   | 39.86   | 60.99  | 1.53  | 0.01854  | 0.046089 |
| ENSOARG00000020808 | EMP1    | 34.4    | 99.16  | 2.88  | 0.018592 | 0.046185 |
| ENSOARG00000000326 | -       | 24.68   | 11.28  | -2.19 | 0.018675 | 0.046242 |
| ENSOARG00000018595 | FAM13A  | 7.89    | 13.13  | 1.66  | 0.018667 | 0.046242 |
| ENSOARG00000012426 | GOT1    | 30.56   | 55.66  | 1.82  | 0.018651 | 0.046242 |
| ENSOARG00000014954 | XPNPEP2 | 41.88   | 17.55  | -2.39 | 0.018669 | 0.046242 |
| ENSOARG00000018383 | DHX58   | 12.53   | 3.82   | -3.28 | 0.018711 | 0.046258 |
| ENSOARG00000009749 | PLCD3   | 5.41    | 11.25  | 2.08  | 0.018706 | 0.046258 |
| ENSOARG00000003080 | STK3    | 26.38   | 42.26  | 1.6   | 0.018696 | 0.046258 |
| ENSOARG00000005660 | PCTP    | 36.01   | 21.81  | -1.65 | 0.01873  | 0.046272 |
| ENSOARG00000006256 | RSRP1   | 22.22   | 13.59  | -1.64 | 0.018732 | 0.046272 |
| ENSOARG00000016924 | ZNF385B | 52.39   | 103.25 | 1.97  | 0.018759 | 0.046321 |
| ENSOARG00000015176 | NUDT5   | 12.46   | 3.92   | -3.18 | 0.018812 | 0.046432 |
| ENSOARG00000006399 | DSG2    | 52.35   | 84.16  | 1.61  | 0.018831 | 0.046437 |
| ENSOARG00000015468 | EPB41L1 | 20.15   | 41.33  | 2.05  | 0.018836 | 0.046437 |
| ENSOARG00000019655 | IGSF11  | 9.32    | 3.09   | -3.02 | 0.018854 | 0.046463 |
| ENSOARG00000004515 | C1R     | 180.9   | 114.13 | -1.59 | 0.018888 | 0.046472 |
| ENSOARG00000020078 | EAF2    | 14.25   | 6.07   | -2.35 | 0.018876 | 0.046472 |
| ENSOARG00000005832 | PJA1    | 14.68   | 8.46   | -1.74 | 0.018885 | 0.046472 |
| ENSOARG00000007546 | DCAF1   | 16.77   | 25.11  | 1.5   | 0.01891  | 0.04649  |
| ENSOARG00000015847 | MYL9    | 109.85  | 52.38  | -2.1  | 0.018908 | 0.04649  |
| ENSOARG00000013394 | KCTD20  | 58.03   | 117.66 | 2.03  | 0.018929 | 0.046499 |
| ENSOARG00000016733 | FGA     | 1360.89 | 693.04 | -1.96 | 0.019059 | 0.046651 |
| ENSOARG00000016857 | FNBP1L  | 28.94   | 58.22  | 2.01  | 0.019057 | 0.046651 |
| ENSOARG00000009856 | HEXIM2  | 11.82   | 3.1    | -3.81 | 0.019049 | 0.046651 |
| ENSOARG00000016259 | INPP1   | 90.47   | 138.65 | 1.53  | 0.019096 | 0.046651 |
| ENSOARG00000005573 | MAGEH1  | 19.11   | 12.78  | -1.5  | 0.019058 | 0.046651 |
| ENSOARG00000019315 | NRBP1   | 151.86  | 260.54 | 1.72  | 0.019096 | 0.046651 |
| ENSOARG00000000485 | SOD3    | 10.98   | 3.7    | -2.97 | 0.019093 | 0.046651 |
| ENSOARG00000008423 | SOS1    | 15.84   | 28.56  | 1.8   | 0.019059 | 0.046651 |
| ENSOARG00000007238 | PAK1    | 39.56   | 73.31  | 1.85  | 0.019113 | 0.046672 |
| ENSOARG00000013699 | COG1    | 28.79   | 18.26  | -1.58 | 0.019196 | 0.04684  |
| ENSOARG00000005067 | VHL     | 39.21   | 26.07  | -1.5  | 0.019206 | 0.046844 |
| ENSOARG00000019350 | PECR    | 33.67   | 14.69  | -2.29 | 0.019256 | 0.046875 |

|                    |              |        |        |       |          |          |
|--------------------|--------------|--------|--------|-------|----------|----------|
| ENSOARG00000001026 | SLC13A5      | 16.34  | 6.87   | -2.38 | 0.019247 | 0.046875 |
| ENSOARG00000009811 | SUGP2        | 23.98  | 7.24   | -3.31 | 0.019236 | 0.046875 |
| ENSOARG00000011482 | GRHPR        | 14.37  | 6.88   | -2.09 | 0.019288 | 0.046915 |
| ENSOARG00000014939 | CLDN15       | 23.26  | 7.45   | -3.12 | 0.01932  | 0.046937 |
| ENSOARG00000012018 | SYBU         | 17.56  | 8.05   | -2.18 | 0.019316 | 0.046937 |
| ENSOARG00000006919 | KIF2A        | 16.82  | 28.97  | 1.72  | 0.019346 | 0.046945 |
| ENSOARG00000020987 | RFX5         | 10.48  | 5.16   | -2.03 | 0.019341 | 0.046945 |
| ENSOARG00000008939 | WDFY2        | 9.96   | 15.74  | 1.58  | 0.01938  | 0.04699  |
| ENSOARG00000010960 | ALG2         | 28.18  | 17.36  | -1.62 | 0.019402 | 0.047008 |
| ENSOARG00000014496 | CXCL8        | 34.14  | 117.42 | 3.44  | 0.019412 | 0.047012 |
| ENSOARG00000009498 | NFKBIE       | 17.36  | 11.43  | -1.52 | 0.019419 | 0.047013 |
| ENSOARG00000005944 | ADGRE5       | 95.82  | 60.98  | -1.57 | 0.019485 | 0.04706  |
| ENSOARG00000007254 | MCU          | 57.46  | 92.68  | 1.61  | 0.019451 | 0.04706  |
| ENSOARG00000013351 | TMEM102      | 7.93   | 1.64   | -4.84 | 0.019471 | 0.04706  |
| ENSOARG00000016350 | RNF39        | 6.92   | 18.4   | 2.66  | 0.019502 | 0.047084 |
| ENSOARG00000014800 | IFIT3        | 39.51  | 10.83  | -3.65 | 0.019536 | 0.047138 |
| ENSOARG00000005665 | PTK7         | 32.71  | 21.83  | -1.5  | 0.01954  | 0.047138 |
| ENSOARG00000009518 | SOX4         | 76.04  | 220.23 | 2.9   | 0.019631 | 0.047302 |
| ENSOARG00000011865 | ERBB2        | 75.55  | 28.6   | -2.64 | 0.019655 | 0.047343 |
| ENSOARG00000018865 | KIAA1671     | 22.24  | 52.2   | 2.35  | 0.019714 | 0.047448 |
| ENSOARG00000020846 | ZNF362       | 10.83  | 5.32   | -2.04 | 0.019723 | 0.047451 |
| ENSOARG00000006990 | CCNJ         | 8.12   | 23.9   | 2.94  | 0.019734 | 0.047454 |
| ENSOARG00000013412 | DENND6A      | 9.9    | 16.88  | 1.71  | 0.019755 | 0.047454 |
| ENSOARG00000011356 | GADD45A      | 122.07 | 425.92 | 3.49  | 0.019753 | 0.047454 |
| ENSOARG00000011930 | NRM          | 23.32  | 13.86  | -1.68 | 0.01974  | 0.047454 |
| ENSOARG00000014258 | F13B         | 68.41  | 31.13  | -2.2  | 0.019772 | 0.047475 |
| ENSOARG00000019578 | ANO6         | 48.05  | 82.05  | 1.71  | 0.019887 | 0.047678 |
| ENSOARG00000009050 | APOF         | 28.9   | 5.61   | -5.15 | 0.019885 | 0.047678 |
| ENSOARG00000016442 | USP31        | 4.6    | 10.07  | 2.19  | 0.019927 | 0.047738 |
| ENSOARG00000020351 | NRROS        | 13.06  | 22.08  | 1.69  | 0.019952 | 0.04776  |
| ENSOARG00000020711 | PIK3CA       | 18.48  | 30.23  | 1.64  | 0.019989 | 0.047829 |
| ENSOARG00000020533 | VAMP8        | 110.45 | 67.42  | -1.64 | 0.020093 | 0.048005 |
| ENSOARG00000014060 | FAHD2A       | 32.95  | 17.55  | -1.88 | 0.020146 | 0.048074 |
| ENSOARG00000013728 | NICN1        | 21.08  | 11.53  | -1.83 | 0.020182 | 0.048135 |
| ENSOARG00000014975 | GTF3C3       | 9.21   | 14.28  | 1.55  | 0.020195 | 0.048137 |
| ENSOARG00000000500 | RNF24        | 2.79   | 9.64   | 3.46  | 0.020298 | 0.048271 |
| ENSOARG00000016019 | -            | 9.02   | 3.05   | -2.96 | 0.020334 | 0.048278 |
| ENSOARG00000000040 | ACBD3        | 53.29  | 82.28  | 1.54  | 0.020325 | 0.048278 |
| ENSOARG00000011734 | FBXO31       | 42.81  | 28.01  | -1.53 | 0.020336 | 0.048278 |
| ENSOARG00000007864 | LCP1         | 103.95 | 180.73 | 1.74  | 0.02034  | 0.048278 |
| ENSOARG00000000194 | ATF2         | 27.37  | 47.6   | 1.74  | 0.020383 | 0.048332 |
| ENSOARG00000009537 | DUSP5        | 45.84  | 124.8  | 2.72  | 0.02043  | 0.048393 |
| ENSOARG00000011042 | LOC101113745 | 21.97  | 10.99  | -2    | 0.020486 | 0.048457 |

|                     |          |        |        |       |          |          |
|---------------------|----------|--------|--------|-------|----------|----------|
| ENSOARG00000002687  | TUBG1    | 25.15  | 14.03  | -1.79 | 0.02048  | 0.048457 |
| ENSOARG000000018727 | FAM13A   | 24.89  | 61.11  | 2.46  | 0.020574 | 0.048628 |
| ENSOARG000000006780 | KBTBD2   | 26.03  | 43.67  | 1.68  | 0.020619 | 0.048678 |
| ENSOARG000000005972 | TNFSF15  | 3.6    | 11.67  | 3.24  | 0.020619 | 0.048678 |
| ENSOARG000000020984 | TRPM7    | 14.94  | 24.36  | 1.63  | 0.020632 | 0.04869  |
| ENSOARG000000006799 | ACOT8    | 15.61  | 9.31   | -1.68 | 0.02069  | 0.048752 |
| ENSOARG000000016432 | ATG12    | 27.03  | 46.74  | 1.73  | 0.020756 | 0.048853 |
| ENSOARG000000002809 | GMEB1    | 9.92   | 18.32  | 1.85  | 0.020754 | 0.048853 |
| ENSOARG000000001920 | SLC22A9  | 19.12  | 1.31   | -14.6 | 0.020748 | 0.048853 |
| ENSOARG000000010273 | SIX5     | 14.85  | 7.33   | -2.03 | 0.020773 | 0.048863 |
| ENSOARG000000003377 | SPINDOC  | 7.03   | 13.4   | 1.91  | 0.020776 | 0.048863 |
| ENSOARG000000013621 | GYPC     | 27.44  | 15.84  | -1.73 | 0.020785 | 0.048865 |
| ENSOARG000000016807 | SAMHD1   | 30.49  | 19.04  | -1.6  | 0.020839 | 0.048954 |
| ENSOARG000000002055 | FOXP4    | 47.22  | 80.77  | 1.71  | 0.020866 | 0.048998 |
| ENSOARG000000010139 | WASF1    | 2.68   | 9.64   | 3.6   | 0.020946 | 0.049151 |
| ENSOARG000000015254 | FBXO9    | 41.68  | 24.5   | -1.7  | 0.020969 | 0.049185 |
| ENSOARG000000006514 | FRMD4A   | 20.82  | 13.32  | -1.56 | 0.020992 | 0.049201 |
| ENSOARG000000016594 | ASPH     | 26.32  | 16.01  | -1.64 | 0.021018 | 0.049243 |
| ENSOARG000000005907 | CD180    | 12.09  | 4.82   | -2.51 | 0.021051 | 0.049292 |
| ENSOARG000000007779 | MANF     | 148.53 | 224.27 | 1.51  | 0.021055 | 0.049292 |
| ENSOARG000000019131 | DHRS1    | 122.73 | 79.99  | -1.53 | 0.021091 | 0.04934  |
| ENSOARG000000004975 | KHDC4    | 35.56  | 21.27  | -1.67 | 0.021121 | 0.049372 |
| ENSOARG000000017872 | AMMECR1  | 39.98  | 96.84  | 2.42  | 0.021203 | 0.049384 |
| ENSOARG000000015908 | ANKRD1   | 203.87 | 856.58 | 4.2   | 0.021169 | 0.049384 |
| ENSOARG000000013781 | PARD6B   | 50.43  | 99.94  | 1.98  | 0.021165 | 0.049384 |
| ENSOARG000000004233 | PML      | 21.51  | 11.99  | -1.79 | 0.021186 | 0.049384 |
| ENSOARG000000006968 | PTPN3    | 34.6   | 19.97  | -1.73 | 0.02117  | 0.049384 |
| ENSOARG000000015011 | ROM1     | 10.46  | 4.07   | -2.57 | 0.021206 | 0.049384 |
| ENSOARG000000001693 | TSPAN3   | 138.14 | 214.14 | 1.55  | 0.021172 | 0.049384 |
| ENSOARG000000010392 | TMEM51   | 54.03  | 83.95  | 1.55  | 0.021221 | 0.049395 |
| ENSOARG000000013061 | UBLCP1   | 56.94  | 34.63  | -1.64 | 0.021234 | 0.049395 |
| ENSOARG000000000089 | GTF3C1   | 22.87  | 14.17  | -1.61 | 0.021325 | 0.049549 |
| ENSOARG000000012445 | PTP4A1   | 74.73  | 131.05 | 1.75  | 0.021346 | 0.04958  |
| ENSOARG000000009235 | RFXANK   | 22.49  | 13.92  | -1.62 | 0.021354 | 0.04958  |
| ENSOARG000000025508 | -        | 7.72   | 2.21   | -3.49 | 0.021393 | 0.049652 |
| ENSOARG000000005859 | SLC25A22 | 23.34  | 15.56  | -1.5  | 0.021451 | 0.049711 |
| ENSOARG000000010596 | GMEB2    | 21.44  | 33.85  | 1.58  | 0.021472 | 0.049741 |
| ENSOARG000000014176 | CCNA2    | 8.91   | 3.2    | -2.78 | 0.021501 | 0.049753 |
| ENSOARG000000011253 | HAPLN3   | 24.35  | 13.39  | -1.82 | 0.021509 | 0.049753 |
| ENSOARG000000007365 | HRAS     | 60.75  | 109.07 | 1.8   | 0.021502 | 0.049753 |
| ENSOARG000000019332 | CCDC80   | 83.76  | 27.23  | -3.08 | 0.021534 | 0.04977  |
| ENSOARG000000016073 | DNAL4    | 12.36  | 28.62  | 2.32  | 0.02154  | 0.04977  |
| ENSOARG000000019942 | OLFML3   | 181.69 | 64.86  | -2.8  | 0.021562 | 0.0498   |

|                    |          |        |       |       |          |          |
|--------------------|----------|--------|-------|-------|----------|----------|
| ENSOARG00000010952 | ARHGEF6  | 37.34  | 24.81 | -1.51 | 0.021586 | 0.049831 |
| ENSOARG00000003704 | NUDT16L1 | 27.41  | 15.09 | -1.82 | 0.021591 | 0.049831 |
| ENSOARG00000008461 | HABP4    | 21.13  | 36.63 | 1.73  | 0.021614 | 0.049847 |
| ENSOARG00000005798 | MT-ND4L  | 130.97 | 72.6  | -1.8  | 0.02161  | 0.049847 |
| ENSOARG00000016628 | CDKN2D   | 14.47  | 26.09 | 1.8   | 0.021665 | 0.049895 |
| ENSOARG00000008040 | CTF1     | 17.42  | 7.77  | -2.24 | 0.021667 | 0.049895 |
| ENSOARG00000003550 | MAP3K6   | 11.5   | 4.99  | -2.3  | 0.021751 | 0.049921 |
| ENSOARG00000012375 | MLXIPL   | 17.03  | 4.99  | -3.41 | 0.021722 | 0.049921 |
| ENSOARG00000001571 | NADSYN1  | 9.53   | 4.22  | -2.26 | 0.021736 | 0.049921 |
| ENSOARG00000011030 | NDUFV3   | 29.98  | 45.45 | 1.52  | 0.021732 | 0.049921 |
| ENSOARG00000008585 | ASF1A    | 23.85  | 15.91 | -1.5  | 0.021795 | 0.049985 |
