# Supplementary material
Source: publisher figshare collection journal article supplement (https://diabetesjournals.figshare.com/articles/dataset/_/23553117)
Supplement: Supplementary file 6 [file 1]

**Table S6. DEGs in IPA pathway for NRF2-mediated Oxidative Stress Response**

| <b>Gene Symbol</b> |
|--------------------|
| ABCC2              |
| ABCC4              |
| AKR1A1             |
| AOX1               |
| ATF4               |
| BACH1              |
| CAT                |
| CBR1               |
| CDC34              |
| DNAJA2             |
| DNAJA4             |
| DNAJB9             |
| DNAJC16            |
| DNAJC21            |
| DNAJC9             |
| EIF2AK3            |
| EPHX1              |
| FOSL1              |
| GCLC               |
| GSTA1              |
| GSTA4              |
| GSTO1              |
| HRAS               |
| HSPB8              |
| MAF                |
| MAFF               |
| MAFG               |
| MAP2K7             |
| MAPK8              |
| MGST2              |
| MRAS               |
| PIK3CA             |
| PRKCE              |
| RAP1B              |
| RAP2A              |
| RAP2B              |
| RASD1              |
| RRAS2              |
| SOD2               |
| SOD3               |
| SQSTM1             |
| TXNRD1             |
| UBE2E3             |
