# Supplementary material
Source: publisher figshare collection journal article supplement (https://diabetesjournals.figshare.com/articles/dataset/_/23553117)
Supplement: Supplementary file 7 [file 1]

**Table S3: Real time PCR Cp values for metformin transporters in fetal liver**

| <b>Gene</b>                | <b>Cp value liver<sup>1</sup></b> |
|----------------------------|-----------------------------------|
| Fetal sheep                |                                   |
| <i>OCT1</i>                | 23.1                              |
| <i>OCT2</i>                | 31.4                              |
| <i>OCT3</i>                | 30.7                              |
| <i>MATE1</i>               | 26.3                              |
| <i>MATE2</i>               | 31.8                              |
| <i>RPS15</i>               | 22.1                              |
| Fetal rhesus macaque       |                                   |
| <i>OCT1</i>                | 19.2                              |
| <i>OCT2</i>                | 32.3                              |
| <i>OCT3</i>                | 29.2                              |
| <i>MATE1</i>               | 23.0                              |
| <i>MATE2</i>               | 30.2                              |
| <i>RPS15</i>               | 19.7                              |
| Fetal Japanese macaque     |                                   |
| <i>OCT1</i>                | 19.8                              |
| <i>RPS15</i>               | 22.0                              |
| Postnatal Japanese macaque |                                   |
| <i>OCT1</i>                | 19.2                              |
| <i>RPS15</i>               | 22.7                              |

<sup>1</sup> The average crossing point threshold value obtained from LightCycler 2<sup>nd</sup> derivative max analysis for fetal liver samples.
