# Supplementary material
Source: publisher figshare collection journal article supplement (https://diabetesjournals.figshare.com/articles/dataset/_/23553117)

Figure S1

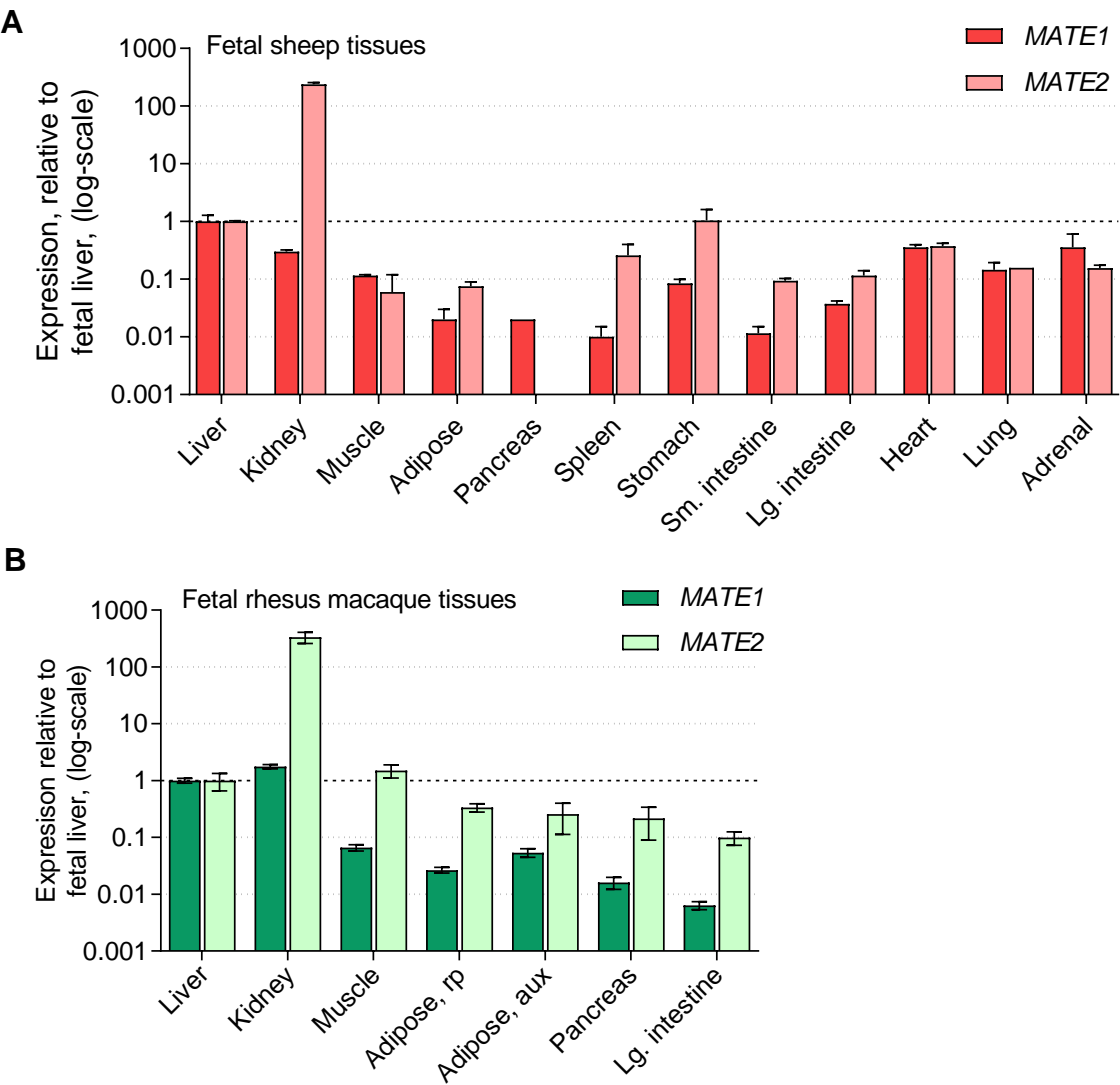

Figure S2

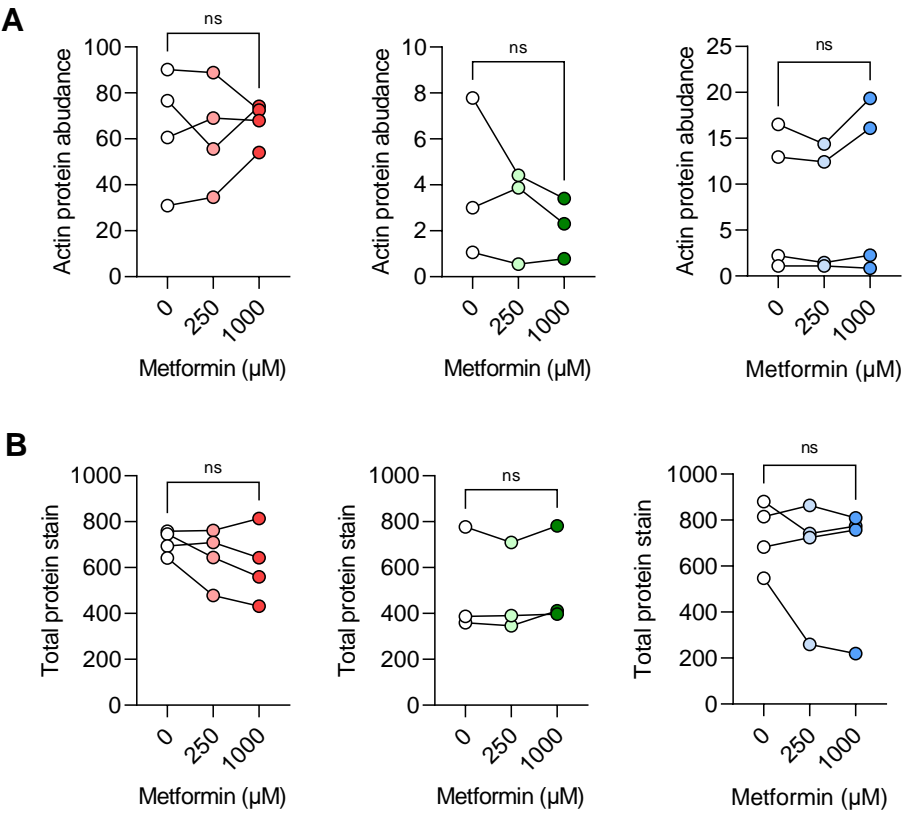

**Figure S3**

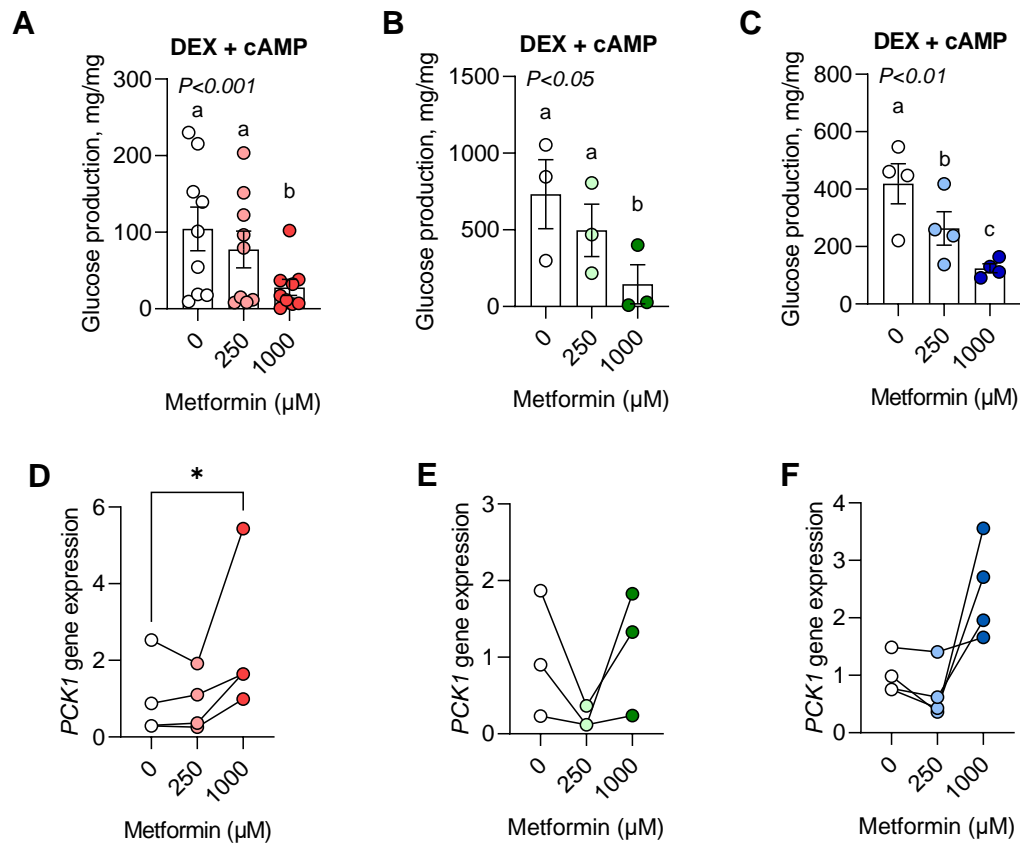

**Figure S4**

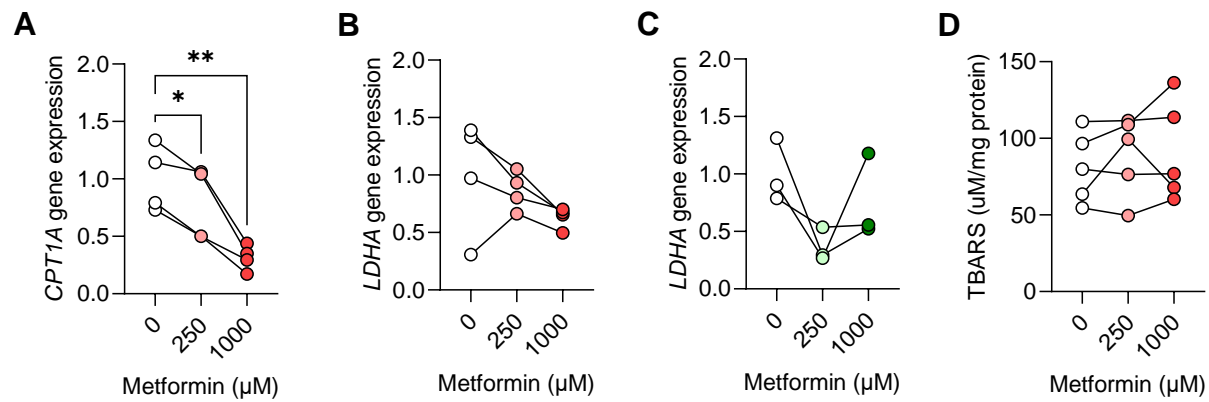

**Figure S5**

**A** Fetal rhesus macaque hepatocytes

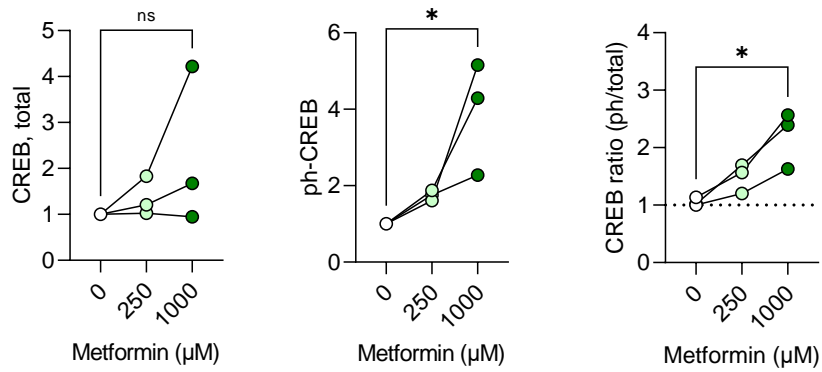

**B** Juvenile Japanese macaque hepatocytes

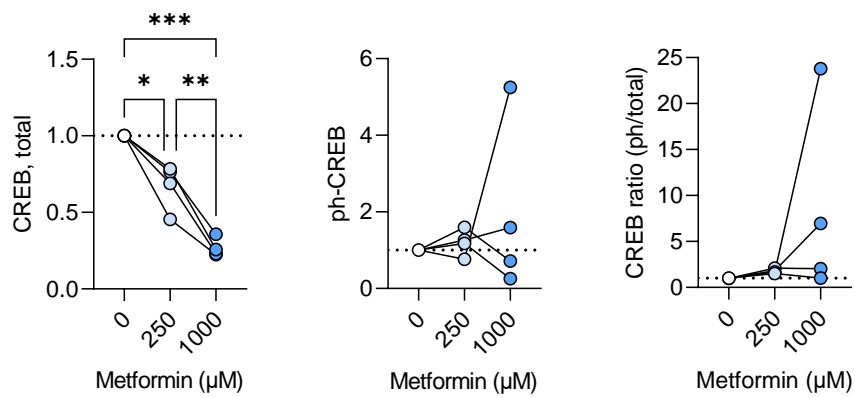

**Figure S6**

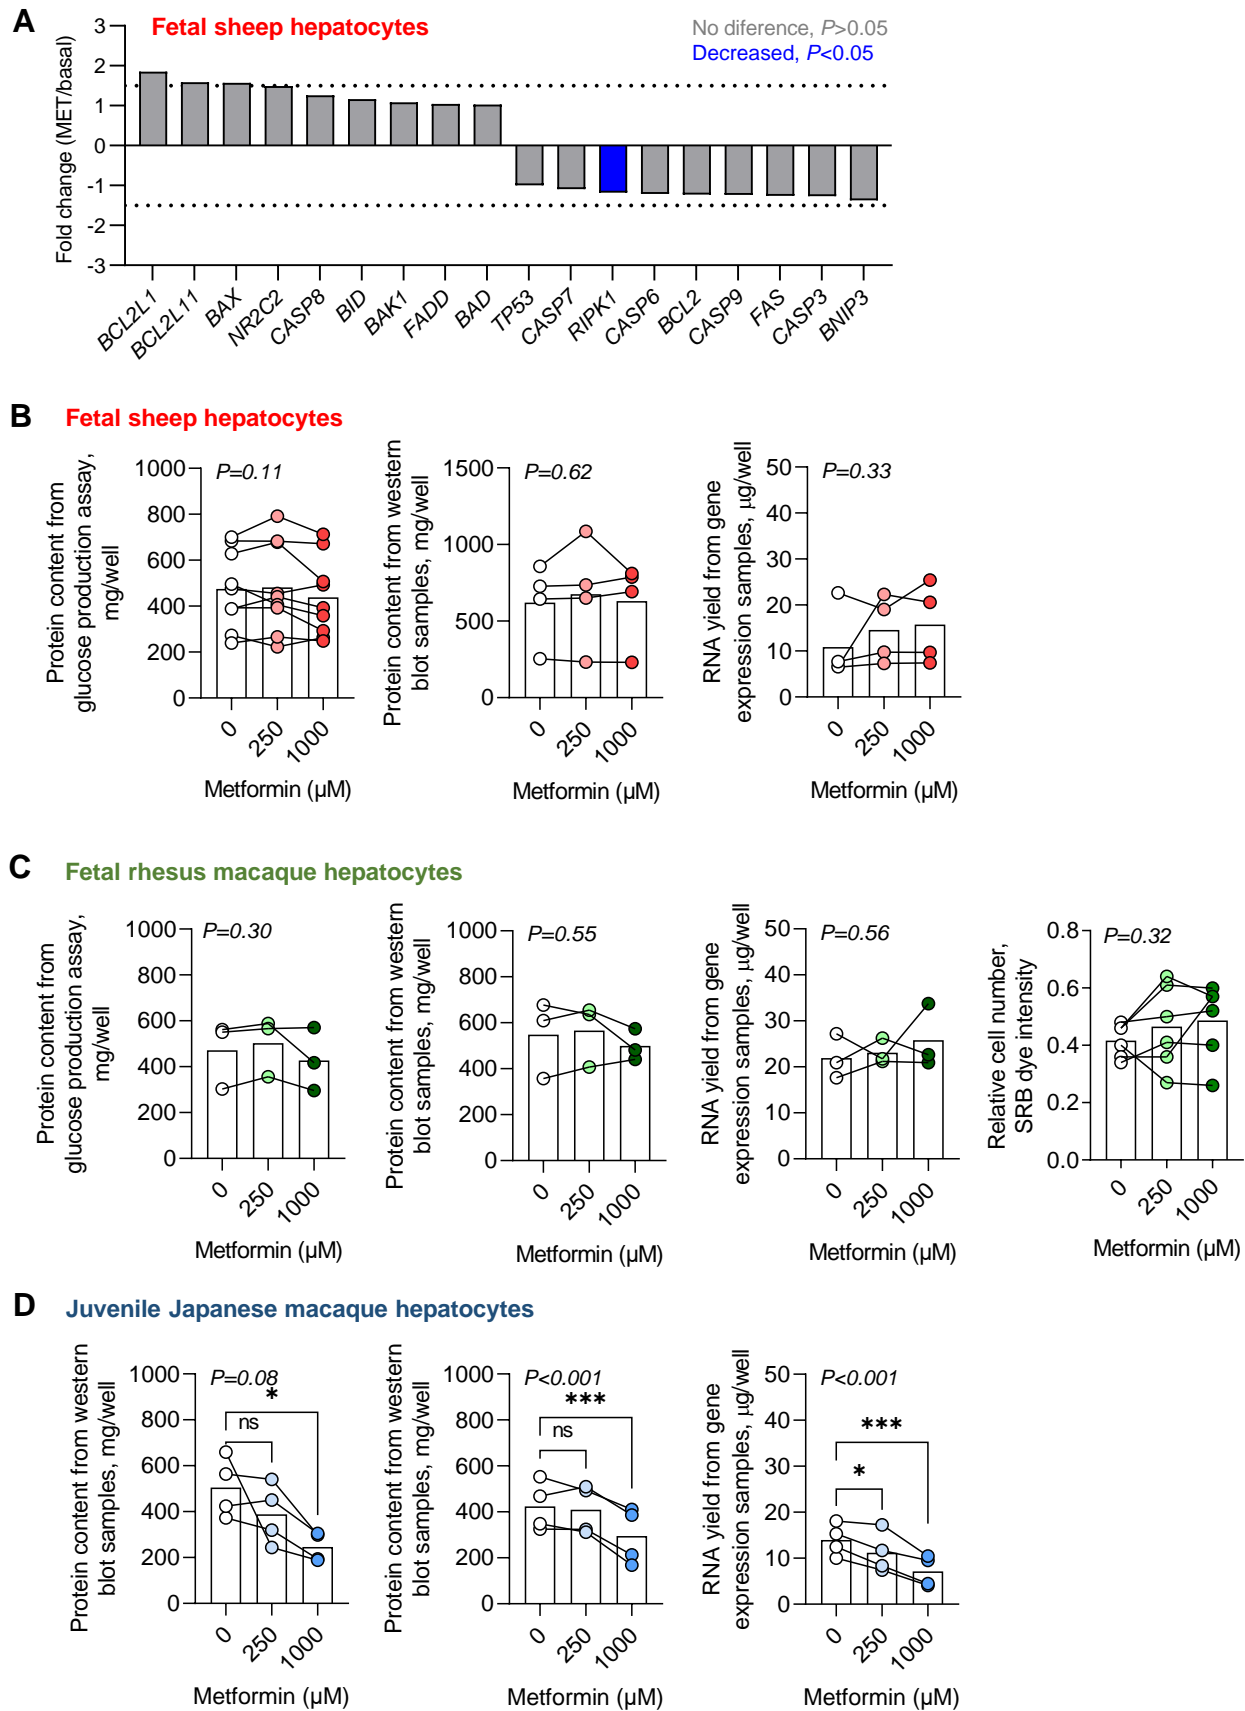

Figure S7

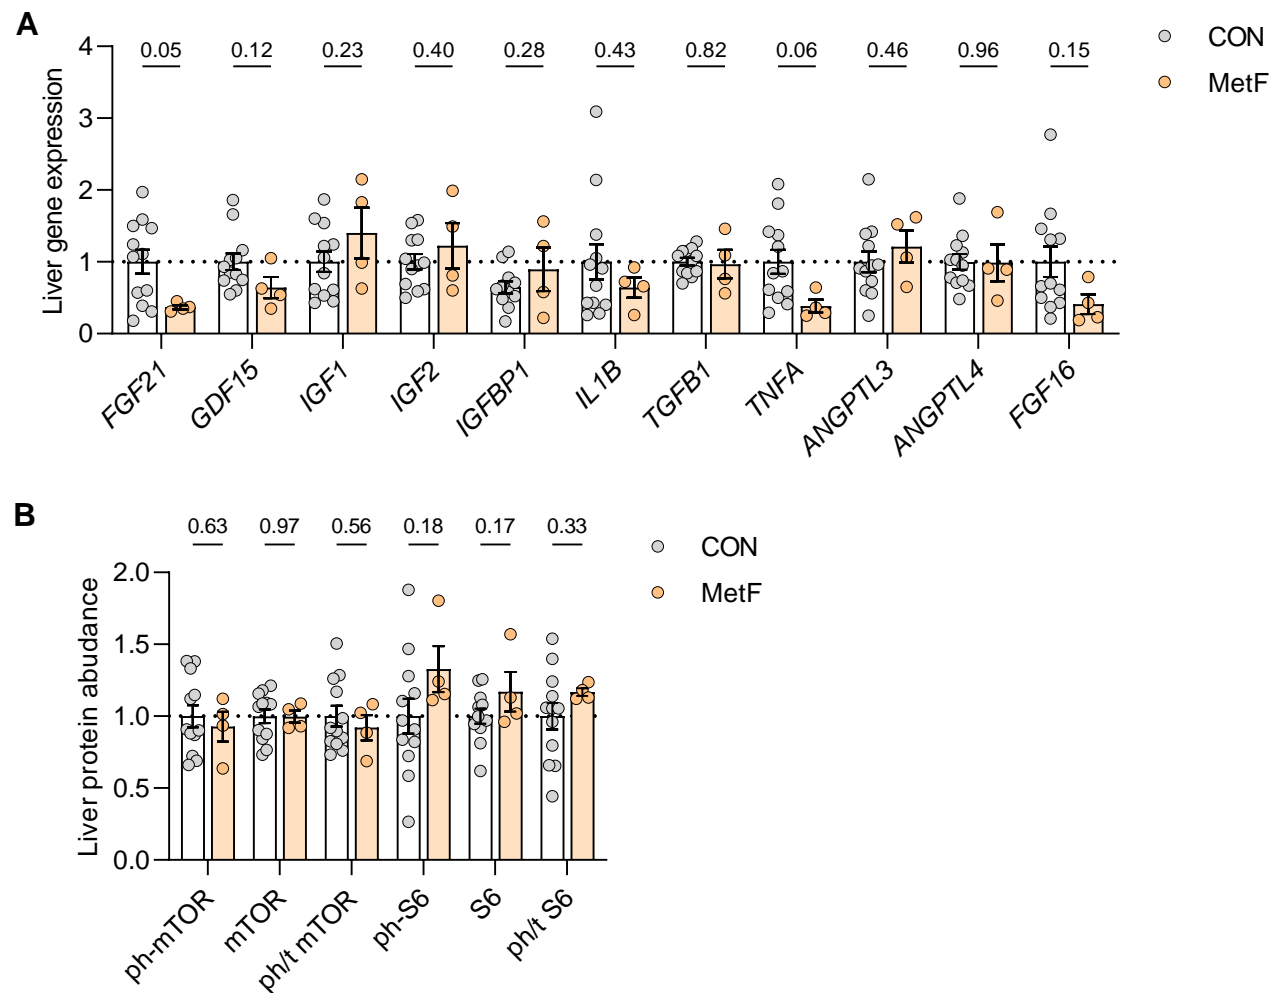

Supplement: Supplementary file 8 [file 1]
